# Supplementary material for: Hierarchical multi-label classification model for science and technology news based on heterogeneous graph semantic enhancement
Source: PeerJ Comput Sci. 2024 Nov 12;10:e2469. doi: 10.7717/peerj-cs.2469 (PMC11623068; doi:10.7717/peerj-cs.2469)
Supplement: Supplemental Information 7 [file peerj-cs-10-2469-s007.xlsx]

## Sheet: Sheet1
Title	Link	Link.1
The 5G Symphony of “Fuzhou on the Sea”	http://money.fjsen.com/2023-01/12/content_31225528.htm	http://money.fjsen.com/2023-01/12/content_31225528.htm
Strong Economic Resilience and Multiple Livelihood Benefits (New Data and Highlights) -2022 from Ten Data Groups	http://www.fjsen.com/2022-12/30/content_31216530.htm	http://www.fjsen.com/2022-12/30/content_31216530.htm
Deep integration and joint construction to build a new pattern of regional coordinated development	http://nd.fjsen.com/2022-12/30/content_31219811.htm	http://nd.fjsen.com/2022-12/30/content_31219811.htm
Xinhua News Agency+Anchoring Innovation Engine, Fujian Striving for Waves in New Manufacturing	http://fjnews.fjsen.com/2022-12/29/content_31215768.htm	http://fjnews.fjsen.com/2022-12/29/content_31215768.htm
Zhangzhou Development Zone: Co Creation Space Listed on Provincial Co Creation Space Recognition List	http://zzpd.fjsen.com/2022-12/28/content_31212244.htm	http://zzpd.fjsen.com/2022-12/28/content_31212244.htm
Accelerate the construction of a modern industrial system (better coordinate supply side structural reform and expand domestic demand)	http://www.fjsen.com/2022-12/28/content_31215090.htm	http://www.fjsen.com/2022-12/28/content_31215090.htm
Liang Weixin: Striving to Write a Chapter in the Comprehensive Construction of a Socialist Modern Country in Ningde	http://ndwm.fjsen.com/2022-12/27/content_31214655.htm	http://ndwm.fjsen.com/2022-12/27/content_31214655.htm
Striving to write a chapter in the comprehensive construction of a socialist modernized country in Ningde - Interview with Ningde Municipal Party Secretary Liang Weixin	http://fjnews.fjsen.com/2022-12/27/content_31214097.htm	http://fjnews.fjsen.com/2022-12/27/content_31214097.htm
Multiple projects in Quanzhou City have become key construction projects for provincial-level vocational education	http://qz.fjsen.com/2022-12/26/content_31213662.htm	http://qz.fjsen.com/2022-12/26/content_31213662.htm
Xiamen Torch High tech Zone: Creating an International Talent Attraction Strong Magnetic Field	http://fjnews.fjsen.com/2022-12/26/content_31213435.htm	http://fjnews.fjsen.com/2022-12/26/content_31213435.htm
Industrial Internet innovation and development exchange training held in Sanming	http://sm.fjsen.com/2022-12/25/content_31213135.htm	http://sm.fjsen.com/2022-12/25/content_31213135.htm
Sanming City accelerates the transformation and upgrading of manufacturing industry	http://sm.fjsen.com/2022-12/25/content_31213134.htm	http://sm.fjsen.com/2022-12/25/content_31213134.htm
Private enterprises in various regions actively seek development	http://www.fjsen.com/2022-12/22/content_31211781.htm	http://www.fjsen.com/2022-12/22/content_31211781.htm
Normalized acceptance of provincial key technological renovation projects in 2023	http://qz.fjsen.com/2022-12/21/content_31210978.htm	http://qz.fjsen.com/2022-12/21/content_31210978.htm
Fujian Industrial Internet Innovation and Development Exchange Training and 2022 Industrial Internet Security Attack and Defense Drill (Sanming Station) was held	http://zzpd.fjsen.com/2022-12/19/content_31209522.htm	http://zzpd.fjsen.com/2022-12/19/content_31209522.htm
Enhancing the competitiveness of the real economy and promoting high-quality industrial development - Interview with Meng Qian, Secretary and Director of the Party Group of the Provincial Development and Reform Commission	http://www.518fuzhou.com/2022-12/19/content_31209474.htm	http://www.518fuzhou.com/2022-12/19/content_31209474.htm
Embracing a more magnificent and bright future - Understanding the overall trend of China's economic development	http://news.fjsen.com/2022-12/16/content_31207439.htm	http://news.fjsen.com/2022-12/16/content_31207439.htm
Beijing Tianjin Hebei, Yangtze River Delta, Guangdong Hong Kong Macao... There are many highlights of regional scientific and technological innovation in China	http://news.fjsen.com/2022-12/15/content_31206868.htm	http://news.fjsen.com/2022-12/15/content_31206868.htm
There are many highlights of regional scientific and technological innovation in China	http://www.fjsen.com/2022-12/15/content_31206828.htm	http://www.fjsen.com/2022-12/15/content_31206828.htm
Protecting Tianbao Rock and nurturing the 'ecological pearl'	http://fjnews.fjsen.com/2022-12/14/content_31205241.htm	http://fjnews.fjsen.com/2022-12/14/content_31205241.htm
Interview with Lin Baojin, member of the Standing Committee of the Provincial Party Committee and Secretary of the Fuzhou Municipal Party Committee: Accelerating the Construction of a Modern International City to Better Benefit the People in the Blessed State	http://fjnews.fjsen.com/2022-12/14/content_31205227.htm	http://fjnews.fjsen.com/2022-12/14/content_31205227.htm
Rongqiao Development Zone builds a modern manufacturing base	http://www.fzccpit.org/2022-12/12/content_31203715.htm	http://www.fzccpit.org/2022-12/12/content_31203715.htm
Fuzhou Science and Technology Innovation Corridor focuses on precise development of new tracks	http://www.fzccpit.org/2022-12/12/content_31203731.htm	http://www.fzccpit.org/2022-12/12/content_31203731.htm
Innovation drives Dehua ceramics to burst with surging vitality	http://qz.fjsen.com/2022-12/10/content_31202607.htm	http://qz.fjsen.com/2022-12/10/content_31202607.htm
Xiamen issues implementation rules to clarify the testing conditions for intelligent connected vehicles on the road	http://xm.fjsen.com/2022-12/10/content_31202528.htm	http://xm.fjsen.com/2022-12/10/content_31202528.htm
Zhangzhou: Leveraging "Smart Wings" to Create Civilized Communities and Promoting Co governance and Good Governance through "Smart" Governance	http://wmf.fjsen.com/2022-12/08/content_31199986.htm	http://wmf.fjsen.com/2022-12/08/content_31199986.htm
Fujian Province's Top 100 Enterprises, Xiamen Enterprises, Take Over the Top Three	http://xm.fjsen.com/2022-12/08/content_31200431.htm	http://xm.fjsen.com/2022-12/08/content_31200431.htm
Gulou continues to innovate its talent work mechanism and promotes the gathering of talents in the three major industries of digital legal finance	http://www.fzccpit.org/2022-12/07/content_31198851.htm	http://www.fzccpit.org/2022-12/07/content_31198851.htm
Zhengli Marine Engineering: Striving for "High Precision and Cutting Edge" to Explore "New Blue Ocean"	http://ptxw.fjsen.com/2022-12/07/content_31200019.htm	http://ptxw.fjsen.com/2022-12/07/content_31200019.htm
Striving to create a new situation of high-quality development of meteorology in Fujian Province - The report of the 20th National Congress of the Communist Party of China has caused a warm response in the meteorological department of Fujian Province	http://www.fjsen.com/zhuanti/2022-12/05/content_31261343.htm	http://www.fjsen.com/zhuanti/2022-12/05/content_31261343.htm
Fujian Province has issued the "Three Year Action Plan for Industrial Digital Transformation in Fujian Province (2023-2025)"	http://fjnews.fjsen.com/2022-12/03/content_31196991.htm	http://fjnews.fjsen.com/2022-12/03/content_31196991.htm
Xiamen University can independently determine the disciplines for provincial "Double First Class" construction	http://xm.fjsen.com/2022-12/03/content_31196779.htm	http://xm.fjsen.com/2022-12/03/content_31196779.htm
The power battery cluster in Ningde City has been selected as one of the 45 national advanced manufacturing clusters	http://nd.fjsen.com/2022-12/01/content_31198900.htm	http://nd.fjsen.com/2022-12/01/content_31198900.htm
Ningde Power Battery Cluster Selected as National Advanced Manufacturing Cluster	http://fjnews.fjsen.com/2022-12/01/content_31194720.htm	http://fjnews.fjsen.com/2022-12/01/content_31194720.htm
The Central Committee of the CPC, the Standing Committee of the National People's Congress of the People's Republic of China, the National Committee of the Chinese People's Political Consultative Conference under the State Council of the People's Republic of China, the CPC and the Central Military Commission of the People's Republic of China report to the whole party, the whole military and the w…	http://www.fjsen.com/2022-11/30/content_31194631.htm	http://www.fjsen.com/2022-11/30/content_31194631.htm
Practicing the management concept of Mulan River and creating a high-quality development and innovation belt - Interview with Fu Chaoyang, Secretary of the Putian Municipal Party Committee	http://pt.fjsen.com/xw/2022-11/30/content_31194374.htm	http://pt.fjsen.com/xw/2022-11/30/content_31194374.htm
Message to the entire Party, army, and people of all ethnic groups in the country	http://www.fjsen.com/2022-11/30/content_31194356.htm	http://www.fjsen.com/2022-11/30/content_31194356.htm
China Telecom supports the vigorous development of industrial intelligent manufacturing in Fujian	http://www.fjsen.com/zhuanti/2022-11/30/content_31193360.htm	http://www.fjsen.com/zhuanti/2022-11/30/content_31193360.htm
Five enterprises in Jinjiang selected as provincial typical application cases	http://qz.fjsen.com/2022-11/29/content_31192196.htm	http://qz.fjsen.com/2022-11/29/content_31192196.htm
The list of the second batch of typical application cases for integrated development in the province has been announced, and 10 spring enterprises have been selected, ranking first in the province in terms of the number of selected cases	http://qz.fjsen.com/2022-11/29/content_31190612.htm	http://qz.fjsen.com/2022-11/29/content_31190612.htm
Xiamen has newly recognized 30 municipal key laboratories this year	http://xm.fjsen.com/2022-11/29/content_31191799.htm	http://xm.fjsen.com/2022-11/29/content_31191799.htm
The Ten Year Development Plan for Higher Education in Fujian Province (2021-2030) has been issued	http://i.fjsen.com/2022-11/25/content_31188908.htm	http://i.fjsen.com/2022-11/25/content_31188908.htm
Luo Yuan: A good new energy project has been put into operation for over two months	http://fjnews.fjsen.com/2022-11/25/content_31188572.htm	http://fjnews.fjsen.com/2022-11/25/content_31188572.htm
Fujian Zhangzhou Yutang Digital Economy Industrial Park Phase I Project has multiple factory buildings with their main structures capped	http://zzpd.fjsen.com/2022-11/24/content_31187843.htm	http://zzpd.fjsen.com/2022-11/24/content_31187843.htm
Consolidate the foundation for the recovery and improvement of industrial economy	http://money.fjsen.com/2022-11/23/content_31187248.htm	http://money.fjsen.com/2022-11/23/content_31187248.htm
High quality and efficient financial services tailored for science and technology innovation enterprises	http://qz.fjsen.com/2022-11/22/content_31185669.htm	http://qz.fjsen.com/2022-11/22/content_31185669.htm
From "leaf shaped" to "tree root shaped", Quanzhou's intellectual property work achieves quantity and quality improvement	http://qz.fjsen.com/2022-11/22/content_31185168.htm	http://qz.fjsen.com/2022-11/22/content_31185168.htm
Today's listing: Ruijie Network	http://money.fjsen.com/2022-11/21/content_31184894.htm	http://money.fjsen.com/2022-11/21/content_31184894.htm
Xinhua News Agency+| Consolidate the foundation of "stability" and accumulate the momentum of "progress" - Observation of the continued recovery trend of the national economy	http://www.fjsen.com/2022-11/19/content_31183487.htm	http://www.fjsen.com/2022-11/19/content_31183487.htm
Fujian wisdom | How did a piece of glass from Fujian go global?	http://np.fjsen.com/2022-11/18/content_31302843.htm	http://np.fjsen.com/2022-11/18/content_31302843.htm
Changle District leaders conduct research on digital new infrastructure work	http://cl.fjsen.com/2022-11/18/content_31181786.htm	http://cl.fjsen.com/2022-11/18/content_31181786.htm
Craftsman Zheng Wen: Craftsmanship remains unchanged, striving for excellence	http://fjnews.fjsen.com/2022-11/18/content_31182533.htm	http://fjnews.fjsen.com/2022-11/18/content_31182533.htm
Jingzhida passed the meeting: This year's 362nd IPO was approved, and CITIC Securities has invested 34.5 times	http://money.fjsen.com/2022-11/18/content_31182244.htm	http://money.fjsen.com/2022-11/18/content_31182244.htm
Unveiled: How Fujian's lace fabric world leader uses 5G+AI to detect defects	http://fjnews.fjsen.com/2022-11/16/content_31180750.htm	http://fjnews.fjsen.com/2022-11/16/content_31180750.htm
Fujian Province launches the application process for the 2022 Postdoctoral Innovation Practice Base	http://fjnews.fjsen.com/2022-11/13/content_31177535.htm	http://fjnews.fjsen.com/2022-11/13/content_31177535.htm
Focusing on industry, "Putian Car" strives to gallop	http://fjnews.fjsen.com/2022-11/12/content_31177202.htm	http://fjnews.fjsen.com/2022-11/12/content_31177202.htm
Today's subscription: Ruijie Network, Matrix Shares	http://money.fjsen.com/2022-11/11/content_31176115.htm	http://money.fjsen.com/2022-11/11/content_31176115.htm
The national roadshow for overseas students returning to China to start their own businesses was held in Xiamen - over a hundred overseas returnees brought their projects to Xiamen for docking	http://fjnews.fjsen.com/2022-11/11/content_31176283.htm	http://fjnews.fjsen.com/2022-11/11/content_31176283.htm
Fuzhou: Play a combination punch to ensure that no one is missed in the sampling process	http://wmf.fjsen.com/2022-11/09/content_31174585.htm	http://wmf.fjsen.com/2022-11/09/content_31174585.htm
Fujian: Guarding the Coral Sea	http://travel.fjsen.com/2022-11/08/content_31173642.htm	http://travel.fjsen.com/2022-11/08/content_31173642.htm
Forge ahead and embark on a new journey with courage and determination towards the future! Hanjiang District thoroughly studies and implements the spirit of the 20th National Congress of the Communist Party of China	http://wmf.fjsen.com/2022-11/08/content_31172892.htm	http://wmf.fjsen.com/2022-11/08/content_31172892.htm
Fuzhou: Play a combination punch to ensure that no one is missed in the sampling process	http://fz.fjsen.com/2022-11/08/content_31173342.htm	http://fz.fjsen.com/2022-11/08/content_31173342.htm
Pioneer | Zhang Hui: Brave as a Pioneer in Technological Innovation	http://fjnews.fjsen.com/2022-11/04/content_31170958.htm	http://fjnews.fjsen.com/2022-11/04/content_31170958.htm
9 Fujian enterprises have been shortlisted for the national pilot demonstration list of integrated development	http://money.fjsen.com/2022-11/03/content_31169403.htm	http://money.fjsen.com/2022-11/03/content_31169403.htm
Fujian: Cherish 'soil' like gold, tap into 'living' land	http://fjnews.fjsen.com/2022-11/03/content_31169590.htm	http://fjnews.fjsen.com/2022-11/03/content_31169590.htm
16 companies from Shishi have been listed as leading industrial enterprises in Quanzhou	http://qz.fjsen.com/2022-11/01/content_31167791.htm	http://qz.fjsen.com/2022-11/01/content_31167791.htm
congratulate! Two parks in Fuqing have been put into operation!	http://www.fzccpit.org/2022-11/01/content_31168061.htm	http://www.fzccpit.org/2022-11/01/content_31168061.htm
Party members, cadres, and the masses in Fuzhou earnestly study and implement the spirit of the 20th National Congress of the Communist Party of China	http://www.fzccpit.org/2022-10/31/content_31166834.htm	http://www.fzccpit.org/2022-10/31/content_31166834.htm
New Digital Momentum Promotes New Development - Experts Discuss the Achievements of Building a Digital China in the New Era	http://www.fjsen.com/zhuanti/2022-10/31/content_31164616.htm	http://www.fjsen.com/zhuanti/2022-10/31/content_31164616.htm
Quanzhou establishes Science and Technology Innovation Angel Fund	http://qz.fjsen.com/2022-10/28/content_31165446.htm	http://qz.fjsen.com/2022-10/28/content_31165446.htm
Quanzhou enterprises account for half of the total	http://money.fjsen.com/2022-10/28/content_31164888.htm	http://money.fjsen.com/2022-10/28/content_31164888.htm
Liang Weixin goes deep into key enterprises in Ningde City to preach the spirit of the 20th National Congress of the Communist Party of China	http://nd.fjsen.com/2022-10/27/content_31164304.htm	http://nd.fjsen.com/2022-10/27/content_31164304.htm
Quanzhou enterprises account for half of the top ten patent applications in the global sports shoe industry	http://fjnews.fjsen.com/2022-10/27/content_31164072.htm	http://fjnews.fjsen.com/2022-10/27/content_31164072.htm
Academicians and experts provide suggestions for Fujian's' Digital Ocean '	http://www.518fuzhou.com/2022-10/25/content_31162687.htm	http://www.518fuzhou.com/2022-10/25/content_31162687.htm
For three consecutive years, the total scale of the digital economy has ranked among the top in the city - digital empowerment adds a smart wing to the development of Nan'an	http://qz.fjsen.com/2022-10/24/content_31161453.htm	http://qz.fjsen.com/2022-10/24/content_31161453.htm
The evaluation results of the standardized construction of pilot parks in the province for 2021 have been released, and Rongqiao Development Zone ranks third	http://fq.fjsen.com/2022-10/18/content_31157439.htm	http://fq.fjsen.com/2022-10/18/content_31157439.htm
Advancing towards a strong sea map and advancing towards deep blue Fuzhou to promote high-quality development of the marine economy	http://www.fzccpit.org/2022-10/17/content_31155870.htm	http://www.fzccpit.org/2022-10/17/content_31155870.htm
Ping Shan Jun | Let the innovation "factor" unleash strong development momentum	http://www.fjnjnews.cn/2022-10/17/content_31156350.htm	http://www.fjnjnews.cn/2022-10/17/content_31156350.htm
Innovative development of modern industries strengthens the backbone	http://money.fjsen.com/2022-10/17/content_31154237.htm	http://money.fjsen.com/2022-10/17/content_31154237.htm
Huli, Xiamen: Pioneers of Reform and Development Set Sail and Embark on a New Journey	http://xm.fjsen.com/2022-10/14/content_31160374.htm	http://xm.fjsen.com/2022-10/14/content_31160374.htm
Xiamen Torch High tech Zone: Recruiting Talents, Attracting Intelligence, and Going Global	http://money.fjsen.com/2022-10/14/content_31153149.htm	http://money.fjsen.com/2022-10/14/content_31153149.htm
Fuzhou accelerates the construction of a modern industrial system	http://www.fzccpit.org/2022-10/14/content_31154381.htm	http://www.fzccpit.org/2022-10/14/content_31154381.htm
Huli, Xiamen: The birthplace of the special economic zone plays a magnificent melody of the new era	http://wmf.fjsen.com/2022-10/14/content_31154122.htm	http://wmf.fjsen.com/2022-10/14/content_31154122.htm
[Celebrating the 20th National Congress of the Communist Party of China Special Issue] Extraordinary · Striving | Innovative Development of Modern Industries Strong Muscle and Bone	http://fjnews.fjsen.com/2022-10/14/content_31154149.htm	http://fjnews.fjsen.com/2022-10/14/content_31154149.htm
Only through openness can there be a way out - "Let the Blessed State Better Benefit the People" continues to generate enthusiastic responses among cadres and the masses in Fuzhou	http://fz.fjsen.com/2022-10/12/content_31151930.htm	http://fz.fjsen.com/2022-10/12/content_31151930.htm
Fuzhou Intelligent Connected Industry Development Seminar Held	http://yq.fjsen.com/2022-10/10/content_31149009.htm	http://yq.fjsen.com/2022-10/10/content_31149009.htm
Ocean Economy Pursuing Dreams Deep Blue	http://money.fjsen.com/2022-10/09/content_31149157.htm	http://money.fjsen.com/2022-10/09/content_31149157.htm
Implementing the Capital Market Enhancement Project to Write a New Chapter of High Quality Development	http://money.fjsen.com/2022-10/09/content_31149158.htm	http://money.fjsen.com/2022-10/09/content_31149158.htm
Changle: With the wind rising, bravely stand at the forefront of the East China Sea and set off again	http://cl.fjsen.com/2022-10/09/content_31148276.htm	http://cl.fjsen.com/2022-10/09/content_31148276.htm
Leading the way in digital economy innovation	http://money.fjsen.com/2022-10/09/content_31147949.htm	http://money.fjsen.com/2022-10/09/content_31147949.htm
Celebrating the 20th National Congress | Fujian: Pursuing Dreams in the Ocean Economy - Deep Blue	http://wmf.fjsen.com/2022-10/09/content_31148983.htm	http://wmf.fjsen.com/2022-10/09/content_31148983.htm
Celebrating the 20th National Congress | Fujian: Leading in Digital Economy Innovation	http://ndwm.fjsen.com/2022-10/09/content_31148981.htm	http://ndwm.fjsen.com/2022-10/09/content_31148981.htm
Fuzhou Intelligent Connected Industry Development Seminar held at Fujian University of Engineering	http://fjnews.fjsen.com/2022-10/08/content_31148806.htm	http://fjnews.fjsen.com/2022-10/08/content_31148806.htm
Forge ahead on a new journey, make achievements in the new era, extraordinary decade | Digital new momentum drives new development - Experts discuss the achievements of building a digital China in the new era	http://www.fjsen.com/2022-10/03/content_31146451.htm	http://www.fjsen.com/2022-10/03/content_31146451.htm
Fuzhou: Industrial Chain Strengthens the Backbone of Manufacturing Industry	http://www.518fuzhou.com/2022-09/30/content_31145142.htm	http://www.518fuzhou.com/2022-09/30/content_31145142.htm
Answering questions from reporters at the press conference of the Provincial Department of Industry and Information Technology on promoting industrial quality improvement, efficiency enhancement, and serving the overall development of the economy	http://fjnews.fjsen.com/2022-09/29/content_31144247.htm	http://fjnews.fjsen.com/2022-09/29/content_31144247.htm
Fujian Province's level of industrial digitization, networking, and intelligence has risen to the forefront of the country	http://fjnews.fjsen.com/2022-09/29/content_31144248.htm	http://fjnews.fjsen.com/2022-09/29/content_31144248.htm
Jin'an District held a press conference on the special economic construction of "Celebrating the 20th National Congress and Advancing New Jin'an"	http://www.fzccpit.org/2022-09/29/content_31143129.htm	http://www.fzccpit.org/2022-09/29/content_31143129.htm
Fujian State owned Enterprises Take New Steps towards High Quality Development in Fujian Province, Fujian Province	http://fjnews.fjsen.com/2022-09/29/content_31143522.htm	http://fjnews.fjsen.com/2022-09/29/content_31143522.htm
Nan'an strives to achieve a digital economy scale of over 100 billion next year	http://qz.fjsen.com/2022-09/27/content_31142205.htm	http://qz.fjsen.com/2022-09/27/content_31142205.htm
85 Years of Pragmatism and Diligence, Striving Forward on the Road of "Medicine"	http://nd.fjsen.com/2022-09/27/content_31142042.htm	http://nd.fjsen.com/2022-09/27/content_31142042.htm
Digital Fuzhou Leads the Tide - Wang Jing Talks about the Innovative Development Path of Digital Fuzhou Construction	http://www.518fuzhou.com/2022-09/26/content_31140983.htm	http://www.518fuzhou.com/2022-09/26/content_31140983.htm
Pingtan: Carefully building nests to attract phoenixes to settle down	http://ptxw.fjsen.com/2022-09/26/content_31140401.htm	http://ptxw.fjsen.com/2022-09/26/content_31140401.htm
Fujian: Creating Dual Innovation Engines to Release New Development Momentum	http://www.518fuzhou.com/2022-09/23/content_31139178.htm	http://www.518fuzhou.com/2022-09/23/content_31139178.htm
Xiamen Torch High tech Zone introduces policies to promote the development of digital economy	http://fjnews.fjsen.com/2022-09/23/content_31138973.htm	http://fjnews.fjsen.com/2022-09/23/content_31138973.htm
The first ETC ramp pre trading system in Fujian Province has been officially launched	http://overseas.fjsen.com/2022-09/22/content_31138869.htm	http://overseas.fjsen.com/2022-09/22/content_31138869.htm
Accelerating the construction of a green supply chain in Fujian under the background of the "dual carbon" target	http://money.fjsen.com/2022-09/21/content_31136147.htm	http://money.fjsen.com/2022-09/21/content_31136147.htm
2022 China Industrial Internet Security Competition (Fujian Provincial Trial)	http://zzpd.fjsen.com/2022-09/20/content_31135515.htm	http://zzpd.fjsen.com/2022-09/20/content_31135515.htm
A company in Sanming has been selected as a typical case of intelligent manufacturing and digital transformation in the national building materials industry	http://sm.fjsen.com/2022-09/20/content_31135745.htm	http://sm.fjsen.com/2022-09/20/content_31135745.htm
Overseas Chinese University has independently added three disciplines, including Intelligent Manufacturing Engineering	http://xm.fjsen.com/2022-09/19/content_31134653.htm	http://xm.fjsen.com/2022-09/19/content_31134653.htm
The Propaganda Department of the Fujian Provincial Party Committee held a press conference on the theme of "Remembering the Mission and Striving for the People" (special session by the Provincial Meteorological Bureau)	http://www.fjsen.com/zhuanti/2022-09/19/content_31245439.htm	http://www.fjsen.com/zhuanti/2022-09/19/content_31245439.htm
Nanping accelerates industrial transformation and upgrading to promote high-quality development of green industry	http://np.fjsen.com/2022-09/18/content_31134323.htm	http://np.fjsen.com/2022-09/18/content_31134323.htm
Nanping Aluminum Industry has been awarded the 3A certification of the National Integration of Informatization and Industrialization Management System	http://np.fjsen.com/2022-09/18/content_31134328.htm	http://np.fjsen.com/2022-09/18/content_31134328.htm
Fujian 1 project selected as the first batch of pilot applications for intelligent transportation pilot	http://fjnews.fjsen.com/2022-09/17/content_31133980.htm	http://fjnews.fjsen.com/2022-09/17/content_31133980.htm
Special press conference on the theme of "Remembering the Mission and Striving for the People" by the Provincial Meteorological Bureau - High quality Meteorological Services for a Better Life for the People	http://fjnews.fjsen.com/2022-09/17/content_31133975.htm	http://fjnews.fjsen.com/2022-09/17/content_31133975.htm
Overseas Chinese University has added three disciplines, including the overseas dissemination of Chinese culture	http://xm.fjsen.com/2022-09/16/content_31133660.htm	http://xm.fjsen.com/2022-09/16/content_31133660.htm
The research results of the key science and technology plan project of Fujian Provincial Quality Inspection Institute and Provincial Bureau have reached the leading level in China	http://www.fjsen.com/zhuanti/2022-09/16/content_31133404.htm	http://www.fjsen.com/zhuanti/2022-09/16/content_31133404.htm
The "White Egret Star" Innovation and Entrepreneurship Competition is held in Xiamen	http://overseas.fjsen.com/2022-09/16/content_31133361.htm	http://overseas.fjsen.com/2022-09/16/content_31133361.htm
In the past decade, Fujian's meteorological forecasts have become more accurate, serving people's livelihoods with greater precision	http://fjnews.fjsen.com/2022-09/16/content_31133708.htm	http://fjnews.fjsen.com/2022-09/16/content_31133708.htm
The Provincial Meteorological Bureau's press conference on "Adhering to the principle of putting people first and life first, providing high-quality meteorological services for a better life for the people" answered questions from reporters	http://fjnews.fjsen.com/2022-09/16/content_31133706.htm	http://fjnews.fjsen.com/2022-09/16/content_31133706.htm
Fuzhou Software Park: Innovation surges, driving force increases, makers gather, promoting employment	http://fz.fjsen.com/2022-09/16/content_31132960.htm	http://fz.fjsen.com/2022-09/16/content_31132960.htm
Dawn Vocational University: Integrating the "Four Movements" into Practice to Demonstrate the Responsibility of the Times	http://qz.fjsen.com/2022-09/15/content_31132491.htm	http://qz.fjsen.com/2022-09/15/content_31132491.htm
Zhangzhou Development Zone: The world's largest single volume intelligent heavy-duty truck without cockpit has been delivered offline	http://zzpd.fjsen.com/2022-09/13/content_31128945.htm	http://zzpd.fjsen.com/2022-09/13/content_31128945.htm
Xiamen establishes intelligent sensor industry alliance	http://fjnews.fjsen.com/2022-09/13/content_31129818.htm	http://fjnews.fjsen.com/2022-09/13/content_31129818.htm
Demand drives efficient collaboration between industrial and supply chains	http://money.fjsen.com/2022-09/09/content_31128483.htm	http://money.fjsen.com/2022-09/09/content_31128483.htm
During the '98' period, 55 projects with a total investment of nearly 40 billion yuan were signed in Huli, Xiamen	http://xm.fjsen.com/2022-09/09/content_31128533.htm	http://xm.fjsen.com/2022-09/09/content_31128533.htm
IPv6 Wave Rises, Southeast Treads on Waves	http://fjnews.fjsen.com/2022-09/09/content_31128190.htm	http://fjnews.fjsen.com/2022-09/09/content_31128190.htm
The wave of IPv6 is on the rise, taking a stroll in the southeast	http://fjnews.fjsen.com/2022-09/09/content_31128148.htm	http://fjnews.fjsen.com/2022-09/09/content_31128148.htm
The final of the 2022 BRICS Industrial Innovation Competition is launched in Xiamen	http://overseas.fjsen.com/2022-09/07/content_31126060.htm	http://overseas.fjsen.com/2022-09/07/content_31126060.htm
The final of the 2022 BRICS Industrial Innovation Competition will be held in Xiamen	http://xm.fjsen.com/2022-09/07/content_31125901.htm	http://xm.fjsen.com/2022-09/07/content_31125901.htm
Fujian Province introduces nine measures to support the digital transformation of industrial enterprises	http://overseas.fjsen.com/2022-09/06/content_31125729.htm	http://overseas.fjsen.com/2022-09/06/content_31125729.htm
Our province has introduced nine measures to support the digital transformation of industrial enterprises	http://money.fjsen.com/2022-09/06/content_31125141.htm	http://money.fjsen.com/2022-09/06/content_31125141.htm
Building a 10000 ton giant ship in the blue ocean of digital economy	http://money.fjsen.com/2022-09/05/content_31123911.htm	http://money.fjsen.com/2022-09/05/content_31123911.htm
These small and medium-sized enterprises in Fujian are very capable of "fighting"	http://money.fjsen.com/2022-09/05/content_31122534.htm	http://money.fjsen.com/2022-09/05/content_31122534.htm
Promote the deep integration of artificial intelligence and the real economy - the acceleration of the development engine of the intelligent economy is stronger	http://www.fjsen.com/2022-09/05/content_31123640.htm	http://www.fjsen.com/2022-09/05/content_31123640.htm
Rongchuang Carnival and the 6th Fuzhou Innovation and Entrepreneurship Competition Finals were held	http://fjnews.fjsen.com/2022-09/03/content_31123325.htm	http://fjnews.fjsen.com/2022-09/03/content_31123325.htm
China's Ten Years · Fujian | Igniting the Innovation Driven Main Engine	http://www.518fuzhou.com/2022-09/02/content_31122831.htm	http://www.518fuzhou.com/2022-09/02/content_31122831.htm
Luojiang District holds the "Digital Empowerment and Smart Future" Digital Economy Industry Development Forum	http://qz.fjsen.com/2022-09/02/content_31121504.htm	http://qz.fjsen.com/2022-09/02/content_31121504.htm
Deepening the integration and innovation of digital technology to promote the leapfrog development of smart oceans	http://money.fjsen.com/2022-09/01/content_31121701.htm	http://money.fjsen.com/2022-09/01/content_31121701.htm
Quanzhou Luojiang: Sixteen digital economy industry projects signed in a centralized manner	http://money.fjsen.com/2022-09/01/content_31121703.htm	http://money.fjsen.com/2022-09/01/content_31121703.htm
The provincial finals of the "Chuangxiang Fujian" competition ended in Fuzhou	http://fjnews.fjsen.com/2022-09/01/content_31121773.htm	http://fjnews.fjsen.com/2022-09/01/content_31121773.htm
Longyan High tech Zone: Focusing on Industry, Seeking Innovation, Rushing out of the Xintiandi of Development	http://ly.fjsen.com/2022-08/31/content_31120574.htm	http://ly.fjsen.com/2022-08/31/content_31120574.htm
Fujian Jinjiang solidly promotes high-quality development of county-level economy	http://qz.fjsen.com/2022-08/30/content_31119520.htm	http://qz.fjsen.com/2022-08/30/content_31119520.htm
Headline on the front page of People's Daily: Fujian Jinjiang solidly promotes high-quality development of county-level economy	http://wmf.fjsen.com/2022-08/28/content_31118404.htm	http://wmf.fjsen.com/2022-08/28/content_31118404.htm
Zhuzifang Industrial Investment Guidance Fund established	http://fz.fjsen.com/2022-08/27/content_31117956.htm	http://fz.fjsen.com/2022-08/27/content_31117956.htm
The first national special support policy for parent funds was released in Xiamen	http://fjnews.fjsen.com/2022-08/26/content_31117624.htm	http://fjnews.fjsen.com/2022-08/26/content_31117624.htm
Building Dreams, Setting Sail in a New Blue Ocean, Embarking on a New Journey. The construction of Fuzhou Silk Road Harbor City is in full swing	http://www.fzccpit.org/2022-08/26/content_31117481.htm	http://www.fzccpit.org/2022-08/26/content_31117481.htm
The flower of technology blooms in the fields and land - a summary of the 23rd anniversary of the implementation of the science and technology special envoy system in Nanping City	http://np.fjsen.com/2022-08/26/content_31117226.htm	http://np.fjsen.com/2022-08/26/content_31117226.htm
Seize the new opportunities of financial capital, gather and develop beyond new driving forces	http://money.fjsen.com/2022-08/25/content_31116774.htm	http://money.fjsen.com/2022-08/25/content_31116774.htm
Fujian: Seize the New Opportunities of Financial Capital, Gather Development, and Surpass New Momentum	http://www.fzccpit.org/2022-08/25/content_31116639.htm	http://www.fzccpit.org/2022-08/25/content_31116639.htm
Zhangzhou: Here, the big health industry is rising	http://fjnews.fjsen.com/2022-08/25/content_31116375.htm	http://fjnews.fjsen.com/2022-08/25/content_31116375.htm
Nanping Power Supply: "Two Substitutes" Empower Substation Operation and Maintenance to Improve Quality and Efficiency	http://np.fjsen.com/2022-08/24/content_31116212.htm	http://np.fjsen.com/2022-08/24/content_31116212.htm
Academicians and experts focus on "Research on Science and Technology Innovation Cooperation between Fujian and the Guangdong Hong Kong Macao Greater Bay Area"	http://fjnews.fjsen.com/2022-08/24/content_31115416.htm	http://fjnews.fjsen.com/2022-08/24/content_31115416.htm
Xiamen accelerates digital infrastructure to build bridges and roads for the development of the digital economy	http://women.fjsen.com/2022-08/23/content_31114533.htm	http://women.fjsen.com/2022-08/23/content_31114533.htm
Fujian Provincial Party Committee and Government issue important implementation opinions	http://www.fjsen.com/zhuanti/2022-08/22/content_31114077.htm	http://www.fjsen.com/zhuanti/2022-08/22/content_31114077.htm
Building bridges and roads for the development of the digital economy	http://money.fjsen.com/2022-08/22/content_31113815.htm	http://money.fjsen.com/2022-08/22/content_31113815.htm
The Provincial Party Committee and Government have issued the 'Implementation Opinions', which comprehensively and accurately implement the new development concept and do a good job in achieving carbon peak and carbon neutrality	http://fjnews.fjsen.com/2022-08/21/content_31113320.htm	http://fjnews.fjsen.com/2022-08/21/content_31113320.htm
Take control of key core technologies in your own hands (in the past decade, General Secretary has encouraged enterprises to develop with high quality)	http://www.fjsen.com/2022-08/20/content_31113249.htm	http://www.fjsen.com/2022-08/20/content_31113249.htm
Over the past decade, Zhangzhou has unwaveringly adhered to the path of high-quality industrial development	http://zzpd.fjsen.com/2022-08/20/content_31113109.htm	http://zzpd.fjsen.com/2022-08/20/content_31113109.htm
Fujian Provincial Political Consultative Conference Special Political Consultative Committee Meeting Held	http://fjnews.fjsen.com/2022-08/19/content_31112229.htm	http://fjnews.fjsen.com/2022-08/19/content_31112229.htm
Fujian Provincial Political Consultative Conference negotiates and discusses on "Enhancing the Digitalization Level of Fujian Manufacturing and Accelerating the Construction of a Strong Manufacturing Province"	http://fjnews.fjsen.com/2022-08/18/content_31112149.htm	http://fjnews.fjsen.com/2022-08/18/content_31112149.htm
Gather the power to move forward and strengthen the backbone of the industry	http://money.fjsen.com/2022-08/18/content_31111558.htm	http://money.fjsen.com/2022-08/18/content_31111558.htm
Gathering the power to move forward and standing up the backbone of the industry - Inheriting and promoting the "Jinjiang experience" and fully promoting high-quality development in Fujian (Part 1)	http://wmf.fjsen.com/2022-08/18/content_31111420.htm	http://wmf.fjsen.com/2022-08/18/content_31111420.htm
The 11th "Ruizhi Cup" Fujian Province College Student Intelligent Design Competition (Undergraduate Group) Finals came to an end	http://fjnews.fjsen.com/2022-08/15/content_31108828.htm	http://fjnews.fjsen.com/2022-08/15/content_31108828.htm
Fujian: Embrace RCEP to jointly build the "the Belt and Road" with high quality	http://www.fzccpit.org/2022-08/11/content_31106169.htm	http://www.fzccpit.org/2022-08/11/content_31106169.htm
Empowering industrial transformation and upgrading with digital technology	http://money.fjsen.com/2022-08/11/content_31106036.htm	http://money.fjsen.com/2022-08/11/content_31106036.htm
Towards Green Intelligent Manufacturing	http://money.fjsen.com/2022-08/11/content_31105858.htm	http://money.fjsen.com/2022-08/11/content_31105858.htm
Embrace RCEP's high-quality co construction of the "the Belt and Road"	http://money.fjsen.com/2022-08/11/content_31105820.htm	http://money.fjsen.com/2022-08/11/content_31105820.htm
Latest notice from Fuzhou! It is related to the relocation and renovation of industrial enterprises in the central urban area!	http://fz.fjsen.com/2022-08/10/content_31105411.htm	http://fz.fjsen.com/2022-08/10/content_31105411.htm
Fujian Mobile releases new products and services, collaborates with industry partners to fully integrate into the construction of 'Digital Fujian'	http://fjnews.fjsen.com/2022-08/10/content_31104806.htm	http://fjnews.fjsen.com/2022-08/10/content_31104806.htm
Leading by industry, Zhangzhou's development is on the backbone	http://fjnews.fjsen.com/2022-08/10/content_31104790.htm	http://fjnews.fjsen.com/2022-08/10/content_31104790.htm
Fujian Province introduces 25 measures to assist small and medium-sized enterprises in overcoming difficulties	http://fz.fjsen.com/2022-08/08/content_31102843.htm	http://fz.fjsen.com/2022-08/08/content_31102843.htm
2022 Xiamen Wuhan IoT Industry Matchmaking Conference held	http://xm.fjsen.com/2022-08/08/content_31102798.htm	http://xm.fjsen.com/2022-08/08/content_31102798.htm
Guomao Zhigu Dual Carbon Industry Salon and Project Cooperation Signing Conference held in Taiwan Business District	http://zzpd.fjsen.com/2022-08/07/content_31102549.htm	http://zzpd.fjsen.com/2022-08/07/content_31102549.htm
The 6th Quanzhou Vocational Skills Competition for Persons with Disabilities was held	http://qz.fjsen.com/2022-08/06/content_31102552.htm	http://qz.fjsen.com/2022-08/06/content_31102552.htm
Quanzhou: Adhere to the people-centered approach and continuously ensure and improve people's livelihoods in development	http://qz.fjsen.com/2022-08/04/content_31101370.htm	http://qz.fjsen.com/2022-08/04/content_31101370.htm
Fuqing is listed as a leading county (city) of industrial Internet to promote digital innovation	http://fq.fjsen.com/2022-08/03/content_31100113.htm	http://fq.fjsen.com/2022-08/03/content_31100113.htm
The 10th National College Student Optoelectronic Design Competition Southeast Region Competition was held at Fujian Normal University	http://fjnews.fjsen.com/2022-08/02/content_31099509.htm	http://fjnews.fjsen.com/2022-08/02/content_31099509.htm
Accurate and effective policies to assist enterprises, steady growth in industrial production	http://money.fjsen.com/2022-08/02/content_31099189.htm	http://money.fjsen.com/2022-08/02/content_31099189.htm
Xiamen: Building a talent led high-quality development demonstration zone	http://fjnews.fjsen.com/2022-08/02/content_31098675.htm	http://fjnews.fjsen.com/2022-08/02/content_31098675.htm
Fuzhou is poised to attract investment with steady progress, and good news spreads again. In the first half of the year, the city reported 1700 projects	http://fz.fjsen.com/2022-08/02/content_31098546.htm	http://fz.fjsen.com/2022-08/02/content_31098546.htm
Luoyuan: Introducing high-end manufacturing projects to shape a livable city with beautiful mountains and clear waters	http://fz.fjsen.com/2022-08/01/content_31097446.htm	http://fz.fjsen.com/2022-08/01/content_31097446.htm
Focus Interview | Digital Engine Intelligent Manufacturing for the Future	http://www.fjsen.com/2022-07/30/content_31097019.htm	http://www.fjsen.com/2022-07/30/content_31097019.htm
[Great Era] Fuzhou: City of Thousand Gardens Shines the "Green" Background, "Blessed State" Ignites the Seaside Landscape	http://www.fjsen.com/2022-07/29/content_31096862.htm	http://www.fjsen.com/2022-07/29/content_31096862.htm
These female college students from Rong have achieved excellent results in the provincial competition, and they come from	http://i.fjsen.com/2022-07/29/content_31096590.htm	http://i.fjsen.com/2022-07/29/content_31096590.htm
Xiamen Torch High tech Zone: Innovation driven high-tech has "numbers"	http://fjnews.fjsen.com/2022-07/29/content_31095966.htm	http://fjnews.fjsen.com/2022-07/29/content_31095966.htm
Fuzhou: The City of Thousand Gardens Shines the "Green" Background and "Blessed State" Ignites the Seaside Landscape	http://fz.fjsen.com/2022-07/29/content_31095899.htm	http://fz.fjsen.com/2022-07/29/content_31095899.htm
Fujian: Accurate and effective policies to assist enterprises, stable growth of industrial production	http://money.fjsen.com/2022-07/28/content_31095287.htm	http://money.fjsen.com/2022-07/28/content_31095287.htm
The construction of Digital China is gaining momentum	http://news.fjsen.com/2022-07/28/content_31095083.htm	http://news.fjsen.com/2022-07/28/content_31095083.htm
Fujian Education Development Foundation donates artificial intelligence equipment with a total value of 100 million yuan	http://fjnews.fjsen.com/2022-07/27/content_31094604.htm	http://fjnews.fjsen.com/2022-07/27/content_31094604.htm
The "Digital Leading Maritime Silk Road Sailing" Forum and the Establishment Ceremony of the Digital Economy Alliance under the Fujian Provincial Federation of Industry and Commerce were successfully held	http://fjnews.fjsen.com/2022-07/27/content_31094468.htm	http://fjnews.fjsen.com/2022-07/27/content_31094468.htm
Inventory of the 5 'Greatest' of this year's Digital Summit	http://www.518fuzhou.com/2022-07/27/content_31094429.htm	http://www.518fuzhou.com/2022-07/27/content_31094429.htm
CGTN | "Endless Digital Grand Event" full of new ideas	http://fz.fjsen.com/2022-07/26/content_31094048.htm	http://fz.fjsen.com/2022-07/26/content_31094048.htm
Absorbing thousands of rivers into the sea and drawing a concentric circle - Comrade Xi Jinping's exploration and practice of united front work during his work in Fujian	http://overseas.fjsen.com/2022-07/26/content_31093653.htm	http://overseas.fjsen.com/2022-07/26/content_31093653.htm
Hardcore technology, showcasing the hardcore strength of digital China	http://overseas.fjsen.com/2022-07/26/content_31093394.htm	http://overseas.fjsen.com/2022-07/26/content_31093394.htm
Review of the 5th Digital China Construction Summit: "Numbers" Gather in Rongcheng to Talk about the Future	http://overseas.fjsen.com/2022-07/26/content_31093267.htm	http://overseas.fjsen.com/2022-07/26/content_31093267.htm
A batch of digital innovation achievements in Sanming City appeared at the Digital Summit	http://sm.fjsen.com/2022-07/26/content_31093102.htm	http://sm.fjsen.com/2022-07/26/content_31093102.htm
The 5th Digital China Construction Summit New Area Supporting Activity - Digital Interactive Forum was successfully held	http://tv.fjsen.com/2022-07/25/content_31092517.htm	http://tv.fjsen.com/2022-07/25/content_31092517.htm
Guangming Daily | Embracing a broader digital future	http://fz.fjsen.com/2022-07/25/content_31092293.htm	http://fz.fjsen.com/2022-07/25/content_31092293.htm
The "Blessed State · Dialogue on the Future" series of activities will continue to be held in Sanfang and Qixiang	http://fz.fjsen.com/2022-07/25/content_31091970.htm	http://fz.fjsen.com/2022-07/25/content_31091970.htm
Luo Yuan: Taking "numbers" as wings and "intelligence" towards the future	http://fz.fjsen.com/2022-07/25/content_31091932.htm	http://fz.fjsen.com/2022-07/25/content_31091932.htm
【 Summit Deep 1 ℃ 】 Empowering the Cultural and Tourism Industry with "Numbers" to See How to Improve "Intelligent" Growth Rate	http://fjnews.fjsen.com/2022-07/24/content_31091786.htm	http://fjnews.fjsen.com/2022-07/24/content_31091786.htm
The Sanming City Competition of China Innovation and Entrepreneurship Competition was successfully held	http://sm.fjsen.com/2022-07/24/content_31091785.htm	http://sm.fjsen.com/2022-07/24/content_31091785.htm
Quanzhou Federation of Trade Unions and Southeast Net jointly launch a series of interviews with employee representatives	http://fjnews.fjsen.com/2022-07/24/content_31124486.htm	http://fjnews.fjsen.com/2022-07/24/content_31124486.htm
How can the integration of data and reality empower industries to improve quality and efficiency at the Digital Summit, which is 1 ℃ deep? These digital enterprises use "numbers" and "squares"	http://fjnews.fjsen.com/2022-07/24/content_31091745.htm	http://fjnews.fjsen.com/2022-07/24/content_31091745.htm
Setting Sail towards the Future - Observation of the Main Forum of the 5th Digital China Construction Summit	http://fjnews.fjsen.com/2022-07/24/content_31091596.htm	http://fjnews.fjsen.com/2022-07/24/content_31091596.htm
Fujian leads industrial transformation to new heights with innovation	http://www.fjsen.com/2022-07/23/content_31091397.htm	http://www.fjsen.com/2022-07/23/content_31091397.htm
Digital leads the new pattern - written on the occasion of the opening of the 5th Digital China Construction Summit	http://www.fjsen.com/2022-07/23/content_31091394.htm	http://www.fjsen.com/2022-07/23/content_31091394.htm
Numbers are flourishing in Fuzhou	http://www.fjsen.com/2022-07/23/content_31091393.htm	http://www.fjsen.com/2022-07/23/content_31091393.htm
The 5th Digital China Construction Achievement Exhibition "Get a First Look"	http://www.fjsen.com/2022-07/23/content_31091392.htm	http://www.fjsen.com/2022-07/23/content_31091392.htm
Interview with Quanzhou Employee Representatives | Leveraging the Leading Role of "Model Workers and Craftsmen" to Empower Industrial Workers for Growth	http://qz.fjsen.com/2022-07/22/content_31090161.htm	http://qz.fjsen.com/2022-07/22/content_31090161.htm
The "Smart Ocean" sub track of the 2022 Digital China Innovation Competition supports industrial digitization	http://overseas.fjsen.com/2022-07/22/content_31090901.htm	http://overseas.fjsen.com/2022-07/22/content_31090901.htm
The first in the country! This weather radar experiment has been launched in Fuzhou	http://fjnews.fjsen.com/2022-07/22/content_31090821.htm	http://fjnews.fjsen.com/2022-07/22/content_31090821.htm
CGTN | Cangshan, Fuzhou: Experts gather to discuss grassroots' smart governance '	http://fz.fjsen.com/2022-07/22/content_31090344.htm	http://fz.fjsen.com/2022-07/22/content_31090344.htm
Quanzhou: High tech industries gradually become new growth poles	http://fjnews.fjsen.com/2022-07/22/content_31090320.htm	http://fjnews.fjsen.com/2022-07/22/content_31090320.htm
Fuzhou Drum Tower: Lighting up the Future with Digital Finance	http://fz.fjsen.com/2022-07/21/content_31089393.htm	http://fz.fjsen.com/2022-07/21/content_31089393.htm
Fuzhou: Digital Party Building Empowers Comprehensive Promotion of High Quality Development Beyond Empowerment	http://fz.fjsen.com/2022-07/19/content_31087509.htm	http://fz.fjsen.com/2022-07/19/content_31087509.htm
Fuzhou Yongli is at the forefront of digital economy development	http://fz.fjsen.com/2022-07/19/content_31087461.htm	http://fz.fjsen.com/2022-07/19/content_31087461.htm
Fujian Manufacturing: Looking forward to jumping from "chain thinking" to "ecological thinking"	http://www.fjsen.com/r/2022-07/18/content_31086872.htm	http://www.fjsen.com/r/2022-07/18/content_31086872.htm
Fujian is committed to high-quality development, with a 2.4-fold increase in gross domestic product over the past decade	http://fjnews.fjsen.com/2022-07/14/content_31084937.htm	http://fjnews.fjsen.com/2022-07/14/content_31084937.htm
Leveraging Cloud Technology to Achieve Transformation and Promote Enterprises to Expand into Global Markets	http://xm.fjsen.com/2022-07/14/content_31084929.htm	http://xm.fjsen.com/2022-07/14/content_31084929.htm
Ten Year Cross Strait Livelihood Meteorological Forum Embarks Again: New Starting Point, New Mission, and New Journey	http://www.fjsen.com/zhuanti/2022-07/14/content_31245162.htm	http://www.fjsen.com/zhuanti/2022-07/14/content_31245162.htm
The on-site meeting for the digital transformation of Jinjiang's industries was held, and Kang Tao attended	http://qz.fjsen.com/2022-07/14/content_31084305.htm	http://qz.fjsen.com/2022-07/14/content_31084305.htm
71 new provincial science and technology small giant enterprises added in Zhangzhou	http://fjnews.fjsen.com/2022-07/14/content_31084158.htm	http://fjnews.fjsen.com/2022-07/14/content_31084158.htm
List of 118 Fujian digital economy innovation enterprises to be selected for 2022 announced in Xiamen	http://xm.fjsen.com/2022-07/14/content_31084011.htm	http://xm.fjsen.com/2022-07/14/content_31084011.htm
Seize opportunities, integrate development, and fully promote the digital transformation of industries in Fujian Province	http://fjnews.fjsen.com/2022-07/14/content_31083985.htm	http://fjnews.fjsen.com/2022-07/14/content_31083985.htm
Ten major technology projects have been selected for the "unveiling and leading" initiative	http://qz.fjsen.com/2022-07/10/content_31081113.htm	http://qz.fjsen.com/2022-07/10/content_31081113.htm
Dividends continue to be released! The Digital Summit brings these changes to Fuzhou	http://fz.fjsen.com/2022-07/10/content_31081049.htm	http://fz.fjsen.com/2022-07/10/content_31081049.htm
China's digital economy ranks second in the world in terms of scale, and its independent chip research and development capabilities are steadily improving	http://www.fjsen.com/2022-07/06/content_31078802.htm	http://www.fjsen.com/2022-07/06/content_31078802.htm
The 'power' of numbers surges through the city of Rongcheng	http://www.fzccpit.org/2022-07/06/content_31078412.htm	http://www.fzccpit.org/2022-07/06/content_31078412.htm
Putian: 60 measures to stabilize the economy introduced	http://overseas.fjsen.com/2022-07/06/content_31078224.htm	http://overseas.fjsen.com/2022-07/06/content_31078224.htm
Migu, Alibaba, Tencent... are here! This month, top enterprises across the country gathered in Fuzhou to discuss the 2022 Digital Interactive Forum	http://tv.fjsen.com/2022-07/05/content_31077563.htm	http://tv.fjsen.com/2022-07/05/content_31077563.htm
The first digital community education college in the province has settled in Zhangzhou Vocational and Technical College	http://zzpd.fjsen.com/2022-07/05/content_31076241.htm	http://zzpd.fjsen.com/2022-07/05/content_31076241.htm
Sanming: Highlighting "fast," "excellent," and "practical" initiatives to promote entrepreneurship and development	http://sm.fjsen.com/2022-07/04/content_31076108.htm	http://sm.fjsen.com/2022-07/04/content_31076108.htm
Fujian Mobile holds 5G Smart Ocean launch event in Ningde	http://money.fjsen.com/2022-06/30/content_31074066.htm	http://money.fjsen.com/2022-06/30/content_31074066.htm
Fujian Telecom's broadband users exceed 10 million, and nine cities have the ability to form gigabit city clusters	http://zzpd.fjsen.com/2022-06/28/content_31072167.htm	http://zzpd.fjsen.com/2022-06/28/content_31072167.htm
Over 10 million broadband users, China Telecom fully supports the construction of 'New Fujian'	http://www.fjsen.com/zhuanti/2022-06/28/content_31072095.htm	http://www.fjsen.com/zhuanti/2022-06/28/content_31072095.htm
Accelerate the cultivation of Fujian's cultural and tourism economy industry, allowing "poetry" and "distant" to travel in both directions	http://fjnews.fjsen.com/2022-06/26/content_31070304.htm	http://fjnews.fjsen.com/2022-06/26/content_31070304.htm
Jinjiang City, Fujian Province - Focusing on Industry Without distractions, Firmly Grasping Innovation (Walking into the County to See Development)	http://www.fjsen.com/2022-06/24/content_31069580.htm	http://www.fjsen.com/2022-06/24/content_31069580.htm
Quanzhou will establish a 200 million yuan angel fund to support college students' entrepreneurship	http://qz.fjsen.com/2022-06/24/content_31069466.htm	http://qz.fjsen.com/2022-06/24/content_31069466.htm
Fuzhou builds a new highland for the development of digital economy	http://www.fzccpit.org/2022-06/24/content_31069386.htm	http://www.fzccpit.org/2022-06/24/content_31069386.htm
The firepower of attracting investment is fully unleashed, optimizing the environment and encouraging innovation. Fuzhou is building a new highland for the development of the digital economy	http://www.518fuzhou.com/2022-06/23/content_31068390.htm	http://www.518fuzhou.com/2022-06/23/content_31068390.htm
Innovation, no matter "background" or "pursuit of glory", moves forward all the way - revisiting Fujian Fuguang Co., Ltd	http://fz.fjsen.com/2022-06/23/content_31068122.htm	http://fz.fjsen.com/2022-06/23/content_31068122.htm
The press conference for the "Yongquan" campaign was held to provide a detailed explanation of the policies for entrepreneurship, employment, and welfare in Quanzhou	http://qz.fjsen.com/2022-06/22/content_31067626.htm	http://qz.fjsen.com/2022-06/22/content_31067626.htm
Building Free Trade Zones and Free Trade Ports - Creating a New High Ground for Reform and Opening up in the New Era	http://www.fjsen.com/2022-06/22/content_31067524.htm	http://www.fjsen.com/2022-06/22/content_31067524.htm
Building a virtuous industrial ecosystem for intelligent construction	http://fjnews.fjsen.com/2022-06/21/content_31066129.htm	http://fjnews.fjsen.com/2022-06/21/content_31066129.htm
Qishan Sci Tech Innovation Cloud Incubation Results Debut at the Sea Innovation Fair, Showcasing the "Intelligence" of Universities	http://www.fjsen.com/zhuanti/2022-06/20/content_31070391.htm	http://www.fjsen.com/zhuanti/2022-06/20/content_31070391.htm
Fujian Port Group: Green and efficient, intelligent services, building a world-class port cluster	http://money.fjsen.com/2022-06/20/content_31065787.htm	http://money.fjsen.com/2022-06/20/content_31065787.htm
The 20th Hai Chuang Fair brings together innovative achievements, and Quanzhou's "hardcore products" make a stunning debut	http://www.fjsen.com/zhuanti/2022-06/20/content_31065643.htm	http://www.fjsen.com/zhuanti/2022-06/20/content_31065643.htm
Observation of the Fujian Financial Services' Four Major Economies' Matchmaking Conference: Stimulating New Momentum and Leading New Directions	http://www.fjsen.com/zhuanti/2022-06/20/content_31065500.htm	http://www.fjsen.com/zhuanti/2022-06/20/content_31065500.htm
Haisheng Panji Science City: "Digital" and "Intelligent" Parks Rise from the Ground	http://www.518fuzhou.com/2022-06/20/content_31065356.htm	http://www.518fuzhou.com/2022-06/20/content_31065356.htm
The 20th Hai Chuang Fair opens, with 19 enterprises from Quanzhou exhibiting 23 innovative project achievements	http://qz.fjsen.com/2022-06/18/content_31064368.htm	http://qz.fjsen.com/2022-06/18/content_31064368.htm
Xiamen issues invitation letters to universities and Xiamen graduates in Xiamen	http://xm.fjsen.com/2022-06/17/content_31064250.htm	http://xm.fjsen.com/2022-06/17/content_31064250.htm
Fujian Leidun Information Security Co., Ltd.: Leveraging platform advantages to create a win-win situation	http://www.fjsen.com/zhuanti/2022-06/17/content_31064191.htm	http://www.fjsen.com/zhuanti/2022-06/17/content_31064191.htm
Fujian Zhonglin Information Technology Co., Ltd. is about to settle in Songxi County	http://np.fjsen.com/2022-06/17/content_31064108.htm	http://np.fjsen.com/2022-06/17/content_31064108.htm
The Blue Book of Fujian Merchants: Development Report of Fujian Merchants (2022) has been released	http://fjnews.fjsen.com/2022-06/17/content_31063357.htm	http://fjnews.fjsen.com/2022-06/17/content_31063357.htm
Fujian style pre made dishes are seizing the new trend	http://fjnews.fjsen.com/2022-06/16/content_31062349.htm	http://fjnews.fjsen.com/2022-06/16/content_31062349.htm
BRICS Innovation Base and New Development Bank sign memorandum of understanding on cooperation	http://fjnews.fjsen.com/2022-06/15/content_31061390.htm	http://fjnews.fjsen.com/2022-06/15/content_31061390.htm
The final of the first Fuzhou Overseas Students Entrepreneurship Competition was held	http://fz.fjsen.com/2022-06/15/content_31061313.htm	http://fz.fjsen.com/2022-06/15/content_31061313.htm
Building a high-level digital government to create a 'convenient Fujian'	http://fjnews.fjsen.com/2022-06/14/content_31060417.htm	http://fjnews.fjsen.com/2022-06/14/content_31060417.htm
The Gate of the Building, the True Chapter of High Quality Development	http://fjnews.fjsen.com/2022-06/14/content_31060207.htm	http://fjnews.fjsen.com/2022-06/14/content_31060207.htm
External communication! Fuzhou Software Park showcases its' international style '!	http://fz.fjsen.com/2022-06/13/content_31059222.htm	http://fz.fjsen.com/2022-06/13/content_31059222.htm
Xiamen: Forge ahead with courage and strive to write a new chapter in the development of the special economic zone	http://fjnews.fjsen.com/2022-06/13/content_31059134.htm	http://fjnews.fjsen.com/2022-06/13/content_31059134.htm
The second phase of the province's industrial Internet training was held in Fuzhou to promote the province's industry to move towards the middle and high end of the value chain	http://fjnews.fjsen.com/2022-06/10/content_31057865.htm	http://fjnews.fjsen.com/2022-06/10/content_31057865.htm
At first sight, three sets of words to understand the profound meaning behind General Secretary Xi Jinping's visit to a private enterprise	http://www.fjsen.com/2022-06/10/content_31057864.htm	http://www.fjsen.com/2022-06/10/content_31057864.htm
Rongqiao Development Zone has developed into Fuzhou's first hundred billion yuan industrial park	http://fz.fjsen.com/2022-06/10/content_31057753.htm	http://fz.fjsen.com/2022-06/10/content_31057753.htm
Opening up a 'new continent' in the digital age	http://fjnews.fjsen.com/2022-06/10/content_31057501.htm	http://fjnews.fjsen.com/2022-06/10/content_31057501.htm
Fully support stabilizing the economy, Industrial Bank helps Quanzhou's manufacturing industry to become bigger, better, and stronger	http://qz.fjsen.com/2022-06/09/content_31057175.htm	http://qz.fjsen.com/2022-06/09/content_31057175.htm
Sanming: 'Green Economy' unleashes ecological dividends	http://sm.fjsen.com/2022-06/09/content_31056582.htm	http://sm.fjsen.com/2022-06/09/content_31056582.htm
Luoyuan Mingguang Iron and Steel Phase II Full Line Thermal Load Test Run	http://fz.fjsen.com/2022-06/09/content_31056571.htm	http://fz.fjsen.com/2022-06/09/content_31056571.htm
Drum Tower: Creating a New High Ground for Digital Talents and Cultivating the "Most Beautiful Window" New Engine	http://www.518fuzhou.com/2022-06/09/content_31056526.htm	http://www.518fuzhou.com/2022-06/09/content_31056526.htm
Fujian Enterprise Yilianzhong Helps Build a National Unified Medical Insurance Information Platform	http://fjnews.fjsen.com/2022-06/08/content_31056281.htm	http://fjnews.fjsen.com/2022-06/08/content_31056281.htm
China NetEase magazine published a documentary on General Secretary Xi Jinping's guidance for the development of information technology in China	http://www.fjsen.com/2022-06/08/content_31055763.htm	http://www.fjsen.com/2022-06/08/content_31055763.htm
Following in the Footsteps of General Secretary · Fujian Chapter: Fujian Mountains, Fujian Waters, and Huaxin	http://www.fjsen.com/2022-06/08/content_31055762.htm	http://www.fjsen.com/2022-06/08/content_31055762.htm
Fujian Mountains, Fujian Waters, and Huaxin (Following the Footsteps of General Secretary · Fujian Chapter)	http://overseas.fjsen.com/2022-06/07/content_31054344.htm	http://overseas.fjsen.com/2022-06/07/content_31054344.htm
Xiamen Huli promotes high-quality development and strengthens its mission as the birthplace of the special economic zone	http://xm.fjsen.com/2022-06/06/content_31053606.htm	http://xm.fjsen.com/2022-06/06/content_31053606.htm
The Nan'an 7 project has been selected as one of the first batch of new generation information technology and manufacturing integration development projects in the province	http://qz.fjsen.com/2022-06/01/content_31050087.htm	http://qz.fjsen.com/2022-06/01/content_31050087.htm
Fujian Practice of "Four New" Construction | Fujian Agriculture and Forestry University "Three dimensional Efforts" to Promote the Construction of New Agricultural Science	http://i.fjsen.com/2022-05/31/content_31049672.htm	http://i.fjsen.com/2022-05/31/content_31049672.htm
Fengze is fully committed to promoting the accelerated development of the digital economy	http://qz.fjsen.com/2022-05/31/content_31048924.htm	http://qz.fjsen.com/2022-05/31/content_31048924.htm
Zhangzhou introduces eight measures to support the high-quality development of food processing industry clusters	http://zzpd.fjsen.com/2022-05/31/content_31048753.htm	http://zzpd.fjsen.com/2022-05/31/content_31048753.htm
The Third First Member Conference of Fujian Human Resources Service Industry Association was held in Minqing	http://fjnews.fjsen.com/2022-05/30/content_31048529.htm	http://fjnews.fjsen.com/2022-05/30/content_31048529.htm
30 Years and 30 Events | Fuzhou Software Park: The Rise of Fushan as a 'Billion Dollar Valley'	http://www.fzccpit.org/2022-05/30/content_31047742.htm	http://www.fzccpit.org/2022-05/30/content_31047742.htm
Pioneering the layout of the blessed state, shining with the radiance of 'numbers'	http://www.fzccpit.org/2022-05/30/content_31047735.htm	http://www.fzccpit.org/2022-05/30/content_31047735.htm
Representatives from Nanping enterprises went to Quanzhou for inspection and study of the "5G+Smart Factory" project	http://np.fjsen.com/2022-05/28/content_31046375.htm	http://np.fjsen.com/2022-05/28/content_31046375.htm
Xiamen: Gathering resources and promoting "hard" power through a "soft" environment	http://xm.fjsen.com/2022-05/26/content_31044989.htm	http://xm.fjsen.com/2022-05/26/content_31044989.htm
Fuzhou (Changle) International Aviation City launches' Ten Major Special Actions'	http://fjnews.fjsen.com/2022-05/25/content_31043190.htm	http://fjnews.fjsen.com/2022-05/25/content_31043190.htm
The Provincial Party Committee and Government solicit opinions and suggestions from experts, scholars, and business people on accelerating the high-quality development of digital economy, marine economy, green economy, and cultural tourism economy	http://wmf.fjsen.com/2022-05/23/content_31040911.htm	http://wmf.fjsen.com/2022-05/23/content_31040911.htm
Changle: Integrating the whole area into the construction of the new district and city, striving towards an important window of modernization as an international city	http://cl.fjsen.com/2022-05/23/content_31040822.htm	http://cl.fjsen.com/2022-05/23/content_31040822.htm
China Construction Bank Nanping Branch's "Technology Entrepreneurship Loan" Helps the Development of Technology based Enterprises	http://np.fjsen.com/2022-05/20/content_31039625.htm	http://np.fjsen.com/2022-05/20/content_31039625.htm
Industrial Bank supports the "Smart Tour of Sanming" and makes tourism accessible	http://sm.fjsen.com/2022-05/20/content_31039517.htm	http://sm.fjsen.com/2022-05/20/content_31039517.htm
The era of "technology flow" in Fujian's innovative financial services for science and technology innovation enterprises has arrived	http://fjnews.fjsen.com/2022-05/20/content_31039076.htm	http://fjnews.fjsen.com/2022-05/20/content_31039076.htm
Building infrastructure based on digitization, networking, and intelligence to create a "new urban construction" that makes cities better (new economic direction)	http://www.fjsen.com/2022-05/16/content_31035065.htm	http://www.fjsen.com/2022-05/16/content_31035065.htm
Fujian Province widely solicits direct financing needs from technology-based enterprises	http://overseas.fjsen.com/2022-05/16/content_31035016.htm	http://overseas.fjsen.com/2022-05/16/content_31035016.htm
New urban construction makes cities better	http://news.fjsen.com/2022-05/16/content_31034840.htm	http://news.fjsen.com/2022-05/16/content_31034840.htm
Strengthening digital empowerment and accelerating the upgrading of manufacturing industry. Hong Jiexu came to Putian for research	http://pt.fjsen.com/xw/2022-05/15/content_31034548.htm	http://pt.fjsen.com/xw/2022-05/15/content_31034548.htm
There seems to be a 'jade belt' around the village	http://fjnews.fjsen.com/2022-05/13/content_31033190.htm	http://fjnews.fjsen.com/2022-05/13/content_31033190.htm
Innovation subject, how to attract "external intelligence" and strengthen "muscles and bones"	http://fjnews.fjsen.com/2022-05/13/content_31033006.htm	http://fjnews.fjsen.com/2022-05/13/content_31033006.htm
Supporting the revitalization of rural industries with the "Three Strong Agriculture" initiatives	http://www.fjsen.com/r/2022-05/10/content_31029929.htm	http://www.fjsen.com/r/2022-05/10/content_31029929.htm
Fujian New Generation Information Technology and Manufacturing Integration Development Project Announced	http://zzpd.fjsen.com/2022-05/09/content_31028753.htm	http://zzpd.fjsen.com/2022-05/09/content_31028753.htm
Digital Youth Gathering in Fuzhou "- Face to face event for young entrepreneurs and technology talents	http://fjnews.fjsen.com/2022-05/07/content_31028172.htm	http://fjnews.fjsen.com/2022-05/07/content_31028172.htm
Aspire for national rejuvenation and strive to become a new generation of the times - Provincial Electronic Information Group launches the "14th Five Year Plan" development plan promotion and youth talent symposium	http://money.fjsen.com/2022-05/05/content_31025959.htm	http://money.fjsen.com/2022-05/05/content_31025959.htm
Gulou District launches special campaign to accelerate investment promotion and increase efficiency during the tough season	http://fz.fjsen.com/2022-05/05/content_31025005.htm	http://fz.fjsen.com/2022-05/05/content_31025005.htm
First quarter economic observation | 30 provinces achieve positive growth, investment becomes a powerful lever for stable growth	http://www.fjsen.com/2022-05/04/content_31024842.htm	http://www.fjsen.com/2022-05/04/content_31024842.htm
Fuzhou University: "Four Emphases" Solidly Promote the Development of New Engineering Construction	http://i.fjsen.com/2022-04/30/content_31023402.htm	http://i.fjsen.com/2022-04/30/content_31023402.htm
Cangshan District signed 12 key investment projects with an expected investment of 32.6 billion yuan	http://fz.fjsen.com/2022-04/28/content_31020968.htm	http://fz.fjsen.com/2022-04/28/content_31020968.htm
Promoting collaborative innovation in agricultural technology to assist the agricultural industry in overcoming difficulties	http://fjnews.fjsen.com/2022-04/26/content_31018827.htm	http://fjnews.fjsen.com/2022-04/26/content_31018827.htm
ICBC Longyan Branch escorts emerging industries and serves local economic transformation	http://ly.fjsen.com/2022-04/24/content_31017423.htm	http://ly.fjsen.com/2022-04/24/content_31017423.htm
A batch of good large-scale projects have landed in Fuzhou for the "Cloud Signing" project	http://fz.fjsen.com/2022-04/22/content_31015362.htm	http://fz.fjsen.com/2022-04/22/content_31015362.htm
The final of the Digital China Low Carbon Track was held in Nanping, and 36 teams were shortlisted	http://np.fjsen.com/2022-04/21/content_31014566.htm	http://np.fjsen.com/2022-04/21/content_31014566.htm
Fujian: Multi link efforts to safeguard the 'rice bag' of the masses	http://overseas.fjsen.com/2022-04/20/content_31013251.htm	http://overseas.fjsen.com/2022-04/20/content_31013251.htm
Changle Textile Industry is moving towards intelligent and high-end development	http://cl.fjsen.com/2022-04/20/content_31012757.htm	http://cl.fjsen.com/2022-04/20/content_31012757.htm
Fujian Province reserves 112900 tons to build a "ballast stone" for food security	http://fjnews.fjsen.com/2022-04/19/content_31012670.htm	http://fjnews.fjsen.com/2022-04/19/content_31012670.htm
Looking up at Fengyun Satellite Service for the Maritime Silk Road - Fujian Provincial Meteorological Bureau Fengyun Satellite Remote Sensing Service for the Construction of the 21st Century Maritime Silk Road	http://www.fjsen.com/zhuanti/2022-04/19/content_31242414.htm	http://www.fjsen.com/zhuanti/2022-04/19/content_31242414.htm
The Provincial Department of Industry and Information Technology, Provincial Department of Finance, and Provincial Financial Supervision Bureau have introduced measures to assist industrial enterprises in overcoming difficulties and stabilizing growth	http://money.fjsen.com/2022-04/18/content_31011480.htm	http://money.fjsen.com/2022-04/18/content_31011480.htm
Fuzhou enters the Internet IPv6 era: this is a new generation of network connection technology, which is widely used in production, life and other aspects	http://www.518fuzhou.com/2022-04/18/content_31010985.htm	http://www.518fuzhou.com/2022-04/18/content_31010985.htm
Fuzhou enters the era of Internet IPv6	http://fz.fjsen.com/2022-04/18/content_31010839.htm	http://fz.fjsen.com/2022-04/18/content_31010839.htm
Fujian Province introduces measures to promote relief and recovery of industrial enterprises, accelerate stable growth	http://money.fjsen.com/2022-04/13/content_31006939.htm	http://money.fjsen.com/2022-04/13/content_31006939.htm
Three departments in Fujian have introduced heavyweight measures to promote relief and stable growth through "real money and silver"	http://fjnews.fjsen.com/2022-04/12/content_31006405.htm	http://fjnews.fjsen.com/2022-04/12/content_31006405.htm
Fuzhou: 'Cloud Signing' Attracts Industry Chain	http://fjnews.fjsen.com/2022-04/08/content_31002766.htm	http://fjnews.fjsen.com/2022-04/08/content_31002766.htm
Changle Industry Chain Investment Promotion "Cloud Signing" 11 Projects	http://cl.fjsen.com/2022-04/08/content_31002557.htm	http://cl.fjsen.com/2022-04/08/content_31002557.htm
Give full play to the leading role of the industry and assist in the construction of "Digital Fuzhou"	http://www.fzccpit.org/2022-04/07/content_31001817.htm	http://www.fzccpit.org/2022-04/07/content_31001817.htm
Lin Baojin visited and researched the Provincial Communications Administration, the three major telecom operators, and New World Group	http://fz.fjsen.com/2022-04/07/content_31001423.htm	http://fz.fjsen.com/2022-04/07/content_31001423.htm
Authoritative and vivid teaching materials for the education of ideological methods	http://www.fjsen.com/2022-04/06/content_31001388.htm	http://www.fjsen.com/2022-04/06/content_31001388.htm
Quanzhou: New combination tax and fee support policy quickly implemented to help enterprises overcome difficulties	http://qz.fjsen.com/2022-04/06/content_31001403.htm	http://qz.fjsen.com/2022-04/06/content_31001403.htm
Enable industrial Internet, open up the industrial chain, supply chain, operation chain, Changle Textile, and move towards intelligent high-end	http://www.fzccpit.org/2022-04/06/content_31000719.htm	http://www.fzccpit.org/2022-04/06/content_31000719.htm
Sanming: With a proud stride and a firm and powerful pace of innovative development	http://sm.fjsen.com/2022-04/04/content_30999599.htm	http://sm.fjsen.com/2022-04/04/content_30999599.htm
The first "Cross Strait Chain" in China to promote the integration and development of cross-strait economy and trade has been launched and put into operation	http://taihai.fjsen.com/2022-04/02/content_30998295.htm	http://taihai.fjsen.com/2022-04/02/content_30998295.htm
Notice from the China Earthquake Administration on Issuing the National Earthquake Science and Technology Development Plan (2021-2035)	http://www.fjsen.com/zhuanti/2022-04/01/content_30998922.htm	http://www.fjsen.com/zhuanti/2022-04/01/content_30998922.htm
The launch and operation of the 'Cross Strait Chain' promotes the integration and development of cross-strait economic and trade	http://www.fzccpit.org/2022-04/01/content_30997331.htm	http://www.fzccpit.org/2022-04/01/content_30997331.htm
BOE Fuzhou's 8.5th generation semiconductor display production line has been awarded the title of "Lighthouse Factory"	http://fjnews.fjsen.com/2022-04/01/content_30997069.htm	http://fjnews.fjsen.com/2022-04/01/content_30997069.htm
Ye Renyou supervises and inspects the epidemic prevention and control work, and promotes the construction of key projects on site	http://fq.fjsen.com/2022-03/28/content_30993165.htm	http://fq.fjsen.com/2022-03/28/content_30993165.htm
Digital Fujian will complete 38 key tasks this year	http://overseas.fjsen.com/2022-03/28/content_30992860.htm	http://overseas.fjsen.com/2022-03/28/content_30992860.htm
Grateful for this year of progress | Changle: Building new districts and cities to shoulder the responsibility of the main force	http://fz.fjsen.com/2022-03/25/content_30991554.htm	http://fz.fjsen.com/2022-03/25/content_30991554.htm
Forge ahead on a new journey and make achievements in the new era. The modern service industry is accelerating its rise	http://www.fjsen.com/2022-03/25/content_30991362.htm	http://www.fjsen.com/2022-03/25/content_30991362.htm
Changle Construction New Area New City Shoulders the Main Force Responsibility	http://www.fzccpit.org/2022-03/25/content_30991282.htm	http://www.fzccpit.org/2022-03/25/content_30991282.htm
Grateful and striving towards the future	http://np.fjsen.com/2022-03/22/content_30988084.htm	http://np.fjsen.com/2022-03/22/content_30988084.htm
Fujian remembers General Secretary Xi Jinping's instructions to move forward courageously and strive to write a chapter in Fujian: gratitude and progress towards the future	http://fjnews.fjsen.com/2022-03/22/content_30987802.htm	http://fjnews.fjsen.com/2022-03/22/content_30987802.htm
Echoes of Spring | Regardless of 'background', pursuing 'light' innovation without stopping	http://fjnews.fjsen.com/2022-03/21/content_30986730.htm	http://fjnews.fjsen.com/2022-03/21/content_30986730.htm
Meet You in Fuzhou in April at the 2nd China International Data Expo	http://money.fjsen.com/2022-03/18/content_30985946.htm	http://money.fjsen.com/2022-03/18/content_30985946.htm
Grateful for the year of striving forward: Putian continues to struggle	http://fjnews.fjsen.com/2022-03/18/content_30985711.htm	http://fjnews.fjsen.com/2022-03/18/content_30985711.htm
Exploration of employment research and problem-solving in a non central coastal city: "Longwen Manufacturing", who will manufacture it?	http://fjnews.fjsen.com/2022-03/18/content_30985388.htm	http://fjnews.fjsen.com/2022-03/18/content_30985388.htm
Fujian Big Data Trading Center landed in Changle	http://www.fzccpit.org/2022-03/18/content_30985229.htm	http://www.fzccpit.org/2022-03/18/content_30985229.htm
The first teacher information literacy AI training studio in Fuzhou has been established	http://i.fjsen.com/2022-03/13/content_30980652.htm	http://i.fjsen.com/2022-03/13/content_30980652.htm
Nourishing market entities with 'green mountains and evergreen trees', Industrial Bank's inclusive small and micro loans exceed 300 billion yuan	http://qz.fjsen.com/2022-03/11/content_30980121.htm	http://qz.fjsen.com/2022-03/11/content_30980121.htm
The Taijiang Special Job Fair offers over 5000 job opportunities, bringing together 37 universities across the province	http://fz.fjsen.com/2022-03/11/content_30979397.htm	http://fz.fjsen.com/2022-03/11/content_30979397.htm
Taijiang's job fair accelerates government school enterprise cooperation to promote 'three improvements and three effects'	http://fz.fjsen.com/2022-03/11/content_30979368.htm	http://fz.fjsen.com/2022-03/11/content_30979368.htm
Good news! Xiamen Eye Center won the Fujian Provincial Science and Technology Award	http://fjnews.fjsen.com/2022-03/10/content_30979228.htm	http://fjnews.fjsen.com/2022-03/10/content_30979228.htm
The "Three Firsts, Three Abilities, and Three Hands" policy promotes the steady development of enterprises. The Party branch of Mingda Industry (Fujian) Co., Ltd. explores new methods of Party building	http://fq.fjsen.com/2022-03/10/content_30978828.htm	http://fq.fjsen.com/2022-03/10/content_30978828.htm
70 projects in Quanzhou have been included in provincial key technological renovation projects	http://qz.fjsen.com/2022-03/08/content_30976527.htm	http://qz.fjsen.com/2022-03/08/content_30976527.htm
The Science and Technology Innovation Corridor Fund injects wings for enterprises to soar	http://money.fjsen.com/2022-03/07/content_30975102.htm	http://money.fjsen.com/2022-03/07/content_30975102.htm
Pan Yue, deputy to the National People's Congress, suggested accelerating the construction of the governance and supervision system of the digital economy	http://fjnews.fjsen.com/2022-03/07/content_30974956.htm	http://fjnews.fjsen.com/2022-03/07/content_30974956.htm
University Study and Discussion | Striving for Responsibility as Courageous Progress and Creating the Future	http://xm.fjsen.com/2022-03/04/content_30980761.htm	http://xm.fjsen.com/2022-03/04/content_30980761.htm
Xiamen New Materials Industry: Accumulate Thick and Develop Ahead of Time	http://fjnews.fjsen.com/2022-03/02/content_30971247.htm	http://fjnews.fjsen.com/2022-03/02/content_30971247.htm
Release the consumption potential of new cultural formats through institutional reform	http://fjnews.fjsen.com/2022-03/01/content_30970315.htm	http://fjnews.fjsen.com/2022-03/01/content_30970315.htm
Xiamen and Fuzhou have been shortlisted for the top ten in China	http://fjnews.fjsen.com/2022-02/27/content_30969077.htm	http://fjnews.fjsen.com/2022-02/27/content_30969077.htm
Promote the integrated development of ecological agriculture and information technology	http://www.fjsen.com/r/2022-02/24/content_30967563.htm	http://www.fjsen.com/r/2022-02/24/content_30967563.htm
Ascend's two major solutions have been shortlisted for the Ministry of Industry and Information Technology's "2021 Typical Solutions for Digital Technology Integration and Innovation Applications"	http://fjnews.fjsen.com/2022-02/23/content_30966937.htm	http://fjnews.fjsen.com/2022-02/23/content_30966937.htm
The total prize money for the 2022 Digital China Innovation Competition reaches 9 million yuan	http://fjnews.fjsen.com/2022-02/22/content_30965412.htm	http://fjnews.fjsen.com/2022-02/22/content_30965412.htm
Two projects in Fujian have been shortlisted for the "5G+Smart Education" application pilot project by the Ministry of Industry and Information Technology	http://fjnews.fjsen.com/2022-02/21/content_30964471.htm	http://fjnews.fjsen.com/2022-02/21/content_30964471.htm
The total prize money reaches 9 million yuan! Announcement on the Progress of Preparation for the 2022 Digital China Innovation Competition	http://fz.fjsen.com/2022-02/18/content_30963692.htm	http://fz.fjsen.com/2022-02/18/content_30963692.htm
The resumption rate of key projects under construction in Fuzhou has reached 100%	http://fz.fjsen.com/2022-02/17/content_30962585.htm	http://fz.fjsen.com/2022-02/17/content_30962585.htm
Provincial Federation of Trade Unions: Using humanistic care to alleviate the "employment difficulties" and "recruitment difficulties" of enterprises	http://fjnews.fjsen.com/2022-02/17/content_30962474.htm	http://fjnews.fjsen.com/2022-02/17/content_30962474.htm
The "14th Five Year Plan" for Digital Zhangzhou has been released, aiming to achieve full coverage of 5G networks by 2025	http://zzpd.fjsen.com/2022-02/17/content_30962369.htm	http://zzpd.fjsen.com/2022-02/17/content_30962369.htm
Jinjiang: 75 projects completed with a total investment of 26.26 billion yuan	http://qz.fjsen.com/2022-02/17/content_30962322.htm	http://qz.fjsen.com/2022-02/17/content_30962322.htm
Jinjiang: 75 projects have been completed and started in a concentrated manner	http://fjnews.fjsen.com/2022-02/17/content_30962291.htm	http://fjnews.fjsen.com/2022-02/17/content_30962291.htm
Ensuring stable investment and promoting consumption, the stable operation of the industrial economy has a good momentum	http://www.fjsen.com/2022-02/15/content_30960966.htm	http://www.fjsen.com/2022-02/15/content_30960966.htm
The industrial economy is running steadily with good momentum	http://www.fjsen.com/2022-02/15/content_30960887.htm	http://www.fjsen.com/2022-02/15/content_30960887.htm
Fujian publicly solicits key technology industrialization projects in the software industry	http://fjnews.fjsen.com/2022-02/14/content_30959200.htm	http://fjnews.fjsen.com/2022-02/14/content_30959200.htm
Jianyang: High Performance Industrial Development Progress Song	http://np.fjsen.com/2022-02/11/content_30958609.htm	http://np.fjsen.com/2022-02/11/content_30958609.htm
Nanping: Technological transformation never stops	http://np.fjsen.com/2022-02/11/content_30957945.htm	http://np.fjsen.com/2022-02/11/content_30957945.htm
Fuzhou Drum Tower: Launching the Battle of Improving Efficiency	http://fjnews.fjsen.com/2022-02/09/content_30956303.htm	http://fjnews.fjsen.com/2022-02/09/content_30956303.htm
Nine key projects signed for 2022 Spring Festival investment promotion in Gulou District, Fuzhou City	http://fjnews.fjsen.com/2022-02/08/content_30956081.htm	http://fjnews.fjsen.com/2022-02/08/content_30956081.htm
Leading the high-quality development of Fujian's digital economy with the new development concept	http://fjnews.fjsen.com/2022-02/08/content_30955376.htm	http://fjnews.fjsen.com/2022-02/08/content_30955376.htm
The total investment is 63.9 billion yuan! Quanzhou: 15 key private enterprise projects signed contracts in a centralized manner	http://qz.fjsen.com/2022-02/07/content_30954357.htm	http://qz.fjsen.com/2022-02/07/content_30954357.htm
Government Work Report - January 22, 2022 at the Sixth Session of the Thirteenth People's Congress of Fujian Province	http://fjnews.fjsen.com/2022-01/29/content_30950585.htm	http://fjnews.fjsen.com/2022-01/29/content_30950585.htm
Industrial Bank Zhangzhou Branch completes the first loan approval under the "technology flow" evaluation system	http://zzpd.fjsen.com/2022-01/27/content_30951718.htm	http://zzpd.fjsen.com/2022-01/27/content_30951718.htm
Representative suggestion: Optimize the business environment and support private enterprises to strengthen their muscles and bones	http://fjnews.fjsen.com/2022-01/24/content_30945196.htm	http://fjnews.fjsen.com/2022-01/24/content_30945196.htm
Provincial Government Work Report: Supporting Xiamen to Build a High Quality Development Leading Demonstration Zone	http://xm.fjsen.com/2022-01/23/content_30944941.htm	http://xm.fjsen.com/2022-01/23/content_30944941.htm
Work hard, courageously move forward, comprehensively promote high-quality development, and surpass - Focus on the government work report	http://fjnews.fjsen.com/2022-01/23/content_30944921.htm	http://fjnews.fjsen.com/2022-01/23/content_30944921.htm
Embracing the sea and embracing all rivers is the key to revitalizing the eight provinces of Fujian - A review of the innovative development of talent in Fujian Province	http://fjnews.fjsen.com/2022-01/20/content_30942413.htm	http://fjnews.fjsen.com/2022-01/20/content_30942413.htm
Review of Key Proposals for the Fourth Session of the 12th Fujian Provincial Political Consultative Conference	http://fjnews.fjsen.com/2022-01/18/content_30940280.htm	http://fjnews.fjsen.com/2022-01/18/content_30940280.htm
Yin Li meets with Liu Liehong, Chairman of China Unicom, and his delegation	http://fjnews.fjsen.com/2022-01/17/content_30939157.htm	http://fjnews.fjsen.com/2022-01/17/content_30939157.htm
Full harvest! 14 signed projects with a total investment of 4.18 billion yuan in Zhangzhou Taiwan Business District	http://zzpd.fjsen.com/2022-01/11/content_30934761.htm	http://zzpd.fjsen.com/2022-01/11/content_30934761.htm
Building a world leading industrial cluster (with greater efforts to plan and promote high-quality development of pilot free trade zones)	http://www.fjsen.com/2022-01/08/content_30933429.htm	http://www.fjsen.com/2022-01/08/content_30933429.htm
Fuzhou Municipal Political Consultative Conference Members Discuss Accelerating the Construction of a Modern Industrial System	http://fz.fjsen.com/2022-01/07/content_30932745.htm	http://fz.fjsen.com/2022-01/07/content_30932745.htm
Xiamen: The total number of talents has reached 1.39 million, and both the scale and quality of talents have been improved	http://xm.fjsen.com/2022-01/07/content_30932418.htm	http://xm.fjsen.com/2022-01/07/content_30932418.htm
Continuously optimizing and upgrading to build a modern industrial system with Longyan characteristics	http://ly.fjsen.com/2022-01/06/content_30932238.htm	http://ly.fjsen.com/2022-01/06/content_30932238.htm
Industrial Leapfrogging Strong Engine - Accelerating the Construction of Modern International Cities Series Review Part 2	http://fz.fjsen.com/2022-01/06/content_30931678.htm	http://fz.fjsen.com/2022-01/06/content_30931678.htm
Interview with Huang Jianxin, Secretary of Gulou District Committee of Fuzhou City: Strive to build the "most beautiful window" of a modern international city	http://www.fzccpit.org/2022-01/05/content_30930838.htm	http://www.fzccpit.org/2022-01/05/content_30930838.htm
Opinions on promoting high-quality development of Fuzhou metropolitan area released, striving to build a 1-hour commuting circle next year	http://fz.fjsen.com/2022-12/31/content_31217115.htm	http://fz.fjsen.com/2022-12/31/content_31217115.htm
Embrace difficulties and strive for progress while maintaining stability! This year, Fujian made every effort to boost its economy	http://www.fzccpit.org/2022-12/30/content_31216485.htm	http://www.fzccpit.org/2022-12/30/content_31216485.htm
Provincial court signs cooperation agreement with World Intellectual Property Organization Arbitration and Mediation Center	http://fjnews.fjsen.com/2022-12/30/content_31216312.htm	http://fjnews.fjsen.com/2022-12/30/content_31216312.htm
Quangang: Pilot Program Promotes Accelerated Standardization Construction of Industrial Parks	http://qz.fjsen.com/2022-12/29/content_31216073.htm	http://qz.fjsen.com/2022-12/29/content_31216073.htm
Concerto "brings" benefits "to China Construction Bank Fujian Branch, promoting innovative services and activating market entities	http://money.fjsen.com/2022-12/29/content_31216081.htm	http://money.fjsen.com/2022-12/29/content_31216081.htm
Pingshan Review | New energy vehicles have great potential in expanding domestic demand	http://fjnews.fjsen.com/2022-12/29/content_31215551.htm	http://fjnews.fjsen.com/2022-12/29/content_31215551.htm
Measures implemented effectively to stabilize economic growth	http://nd.fjsen.com/2022-12/28/content_31215438.htm	http://nd.fjsen.com/2022-12/28/content_31215438.htm
Prioritizing the recovery and expansion of consumption (better coordinating supply side structural reform and expanding domestic demand)	http://www.fjsen.com/2022-12/28/content_31215088.htm	http://www.fjsen.com/2022-12/28/content_31215088.htm
Fuqing Rongqiao Economic and Technological Development Zone: "Technology Magnetic Field" Strengths Up to Billion Yuan Park, Ascending Again	http://fjnews.fjsen.com/2022-12/25/content_31213139.htm	http://fjnews.fjsen.com/2022-12/25/content_31213139.htm
The second session of the fifth People's Congress of Xiang'an District opened yesterday	http://xm.fjsen.com/2022-12/24/content_31212875.htm	http://xm.fjsen.com/2022-12/24/content_31212875.htm
Xinhua Review | Adhering to a General Tone and Striving for Progress in Stability - Learning from the Spirit of the Central Economic Work Conference and Doing a Good Job in Economic Work Review Part 2	http://www.fjsen.com/2022-12/24/content_31212915.htm	http://www.fjsen.com/2022-12/24/content_31212915.htm
Pingshan Review | Promoting More Advanced Manufacturing Clusters to be Selected into the 'National Team'	http://fjnews.fjsen.com/2022-12/24/content_31212851.htm	http://fjnews.fjsen.com/2022-12/24/content_31212851.htm
The research project on the development strategy of the automobile industry cluster in Fujian Province has been launched	http://www.518fuzhou.com/2022-12/23/content_31212351.htm	http://www.518fuzhou.com/2022-12/23/content_31212351.htm
The first village level electric vehicle charging station in Ningde has settled in Kengxia Village, Fu'an	http://nd.fjsen.com/2022-12/23/content_31212491.htm	http://nd.fjsen.com/2022-12/23/content_31212491.htm
Interpreting and Preaching New Ideas, Concentrating and Composing New Chapters - Overview of the Propaganda Activities for Learning and Implementing the Spirit of the 20th National Congress of the Communist Party of China in Ningde City	http://nd.fjsen.com/2022-12/23/content_31212662.htm	http://nd.fjsen.com/2022-12/23/content_31212662.htm
Ningde, Fujian: Deepening grassroots propaganda to promote the implementation and rooting of the spirit of the 20th National Congress of the Communist Party of China	http://wmf.fjsen.com/2022-12/23/content_31212613.htm	http://wmf.fjsen.com/2022-12/23/content_31212613.htm
The pulse of 'Made in Xiamen' is strong	http://xm.fjsen.com/2022-12/23/content_31212109.htm	http://xm.fjsen.com/2022-12/23/content_31212109.htm
The entire main stream of the Minjiang River has resumed navigation, and the "golden waterway" has regained new momentum	http://fjnews.fjsen.com/2022-12/23/content_31212185.htm	http://fjnews.fjsen.com/2022-12/23/content_31212185.htm
The Rise of the Golden Phoenix	http://nd.fjsen.com/2022-12/22/content_31211720.htm	http://nd.fjsen.com/2022-12/22/content_31211720.htm
Fuzhou takes multiple measures to promote the landing of more large and good projects	http://www.518fuzhou.com/2022-12/21/content_31211087.htm	http://www.518fuzhou.com/2022-12/21/content_31211087.htm
List of Provincial Service oriented Manufacturing Demonstrations (Enterprises, Projects, Platforms, Cities) for 2022	http://fjnews.fjsen.com/2022-12/21/content_31210871.htm	http://fjnews.fjsen.com/2022-12/21/content_31210871.htm
Fujian Province announces the list of excellent scenarios and demonstration factory projects for provincial intelligent manufacturing in 2022	http://fjnews.fjsen.com/2022-12/21/content_31210870.htm	http://fjnews.fjsen.com/2022-12/21/content_31210870.htm
Pingnan: Accelerating the pace of the "Three First Class" industries and striving to become the vanguard of development in mountainous counties	http://nd.fjsen.com/2022-12/21/content_31219210.htm	http://nd.fjsen.com/2022-12/21/content_31219210.htm
Constructing a new model of industrial cooperation and building a green digital new economy - A side note of the 2022 Cross Strait Entrepreneurs Summit Annual Meeting	http://taihai.fjsen.com/2022-12/21/content_31210607.htm	http://taihai.fjsen.com/2022-12/21/content_31210607.htm
Seawater hydrogen production technology settled in Fuzhou	http://www.fzccpit.org/2022-12/20/content_31210231.htm	http://www.fzccpit.org/2022-12/20/content_31210231.htm
Pingtan: 'Racing+' showcases new vitality in island tourism	http://ptxw.fjsen.com/2022-12/20/content_31209216.htm	http://ptxw.fjsen.com/2022-12/20/content_31209216.htm
Xiamen Haicang: Increase capital and expand production without stopping, strive for excellence and embark on a new journey	http://xm.fjsen.com/2022-12/20/content_31209747.htm	http://xm.fjsen.com/2022-12/20/content_31209747.htm
How can Gulangyu become a pioneer in national scenic spots with nearly zero carbon emissions?	http://travel.fjsen.com/2022-12/19/content_31209583.htm	http://travel.fjsen.com/2022-12/19/content_31209583.htm
Fujian Province's green tax reduction of 41.8 billion yuan over five years	http://overseas.fjsen.com/2022-12/19/content_31209543.htm	http://overseas.fjsen.com/2022-12/19/content_31209543.htm
The beautiful scenery of Pingtan brings good prospects	http://ptxw.fjsen.com/2022-12/19/content_31209252.htm	http://ptxw.fjsen.com/2022-12/19/content_31209252.htm
With steady progress, China's economy has great potential	http://www.fjsen.com/2022-12/19/content_31209040.htm	http://www.fjsen.com/2022-12/19/content_31209040.htm
The Road of Hengshen, from Zero Breakthrough to Billion Garden	http://fjnews.fjsen.com/2022-12/19/content_31208879.htm	http://fjnews.fjsen.com/2022-12/19/content_31208879.htm
Focus Interview: China's Foreign Trade Stability and Quality Improvement	http://www.fjsen.com/2022-12/17/content_31208410.htm	http://www.fjsen.com/2022-12/17/content_31208410.htm
From January to November, the added value of industrial enterprises above designated size in Fujian Province increased by 6.2%	http://fjnews.fjsen.com/2022-12/17/content_31208332.htm	http://fjnews.fjsen.com/2022-12/17/content_31208332.htm
Fujian Province proposes a target of 600 billion yuan in lithium battery industry output value	http://fjnews.fjsen.com/2022-12/17/content_31208338.htm	http://fjnews.fjsen.com/2022-12/17/content_31208338.htm
Fujian strives to build over 1000 electric vehicle swapping stations in the province by 2025	http://fjnews.fjsen.com/2022-12/16/content_31208316.htm	http://fjnews.fjsen.com/2022-12/16/content_31208316.htm
Strong efforts to grab orders, strong confidence in winning orders, foreign trade opens up year-end sprint mode	http://www.fjsen.com/2022-12/16/content_31207888.htm	http://www.fjsen.com/2022-12/16/content_31207888.htm
21 achievements of Fujian Provincial Meteorological Department won awards in the "Five Small" Innovation Competition for millions of employees in the province	http://www.fjsen.com/zhuanti/2022-12/14/content_31245534.htm	http://www.fjsen.com/zhuanti/2022-12/14/content_31245534.htm
Announcement of Ningde Public Transport Co., Ltd. on the diversion of some bus routes in the urban area	http://nd.fjsen.com/zt/2022-12/14/content_31205436.htm	http://nd.fjsen.com/zt/2022-12/14/content_31205436.htm
Striving for a new chapter with courage and determination: 2022 Fujian Taiwan Intellectual Property Roundtable Conference held in Xiamen	http://www.fjsen.com/zhuanti/2022-12/13/content_31204183.htm	http://www.fjsen.com/zhuanti/2022-12/13/content_31204183.htm
Fuding: "Technological Innovation+Intelligent Manufacturing" to Improve Quality and Efficiency	http://money.fjsen.com/2022-12/12/content_31203833.htm	http://money.fjsen.com/2022-12/12/content_31203833.htm
This year, 23 provincial-level major science and technology projects in Fujian have received financial subsidies	http://fjnews.fjsen.com/2022-12/12/content_31203725.htm	http://fjnews.fjsen.com/2022-12/12/content_31203725.htm
New Era, New Journey, New Achievements | Demonstrating New Achievements in Promoting High Quality Development - Overview of the Spirit of the 20th National Congress of the Communist Party of China Entering Enterprises and Institutions	http://www.fjsen.com/2022-12/12/content_31203408.htm	http://www.fjsen.com/2022-12/12/content_31203408.htm
The Warm Moment between General Secretary and Dream Chasers | "If China wants to become strong and rejuvenate, it must vigorously develop science and technology"	http://www.fjsen.com/2022-12/10/content_31202671.htm	http://www.fjsen.com/2022-12/10/content_31202671.htm
Interview: Saudi Aramco will work with Chinese partners to maintain industrial supply chain security and stability - Interview with Saudi Aramco Chairman Rumayyan	http://www.fjsen.com/2022-12/10/content_31202474.htm	http://www.fjsen.com/2022-12/10/content_31202474.htm
Xiamen: Returning to the Essence of Education, Haicang Builds a New Landmark for Public Welfare Research and Learning	http://wmf.fjsen.com/2022-12/09/content_31201780.htm	http://wmf.fjsen.com/2022-12/09/content_31201780.htm
State Grid Fujian Electric Power: "New Energy e-Assistant" officially launched "Online State Grid"	http://fjnews.fjsen.com/2022-12/09/content_31202163.htm	http://fjnews.fjsen.com/2022-12/09/content_31202163.htm
Fund+Association+Park 3D Investment Promotion with Abundant Achievements - Huian's Investment Promotion and Talent Attraction Accelerate	http://qz.fjsen.com/2022-12/08/content_31200751.htm	http://qz.fjsen.com/2022-12/08/content_31200751.htm
Green mountains and clear waters are priceless treasures | Sanming: "Bamboo" gathers in all directions for green development	http://sm.fjsen.com/2022-12/08/content_31200838.htm	http://sm.fjsen.com/2022-12/08/content_31200838.htm
Fourth quarter economic observation | Each region focuses on its own advantages, strengthens key industries, and cultivates new driving forces	http://www.fjsen.com/2022-12/06/content_31199014.htm	http://www.fjsen.com/2022-12/06/content_31199014.htm
Focusing on key areas, overcoming difficulties, leveraging advantages, and cultivating new driving forces in various regions	http://www.fjsen.com/2022-12/06/content_31199018.htm	http://www.fjsen.com/2022-12/06/content_31199018.htm
Promote the construction of a socialist modernized country with high-quality development	http://fjnews.fjsen.com/2022-12/06/content_31198696.htm	http://fjnews.fjsen.com/2022-12/06/content_31198696.htm
Innovation drives cost reduction and efficiency improvement in the new energy industry	http://money.fjsen.com/2022-12/05/content_31198296.htm	http://money.fjsen.com/2022-12/05/content_31198296.htm
How did a piece of glass from Fujian go global	http://money.fjsen.com/2022-12/02/content_31196486.htm	http://money.fjsen.com/2022-12/02/content_31196486.htm
State Grid Fujian Xiamen Power Supply Company's innovative measures help optimize the business environment	http://fjnews.fjsen.com/2022-12/02/content_31195634.htm	http://fjnews.fjsen.com/2022-12/02/content_31195634.htm
Xiamen takes the lead in introducing special funds to support "new electricity" enterprise projects	http://fjnews.fjsen.com/2022-12/02/content_31195596.htm	http://fjnews.fjsen.com/2022-12/02/content_31195596.htm
Huian "Fund+Association+Park" 3D Investment Promotion Activity and "Platform Empowering Industry Iteration" Development Forum held	http://qz.fjsen.com/2022-12/01/content_31195504.htm	http://qz.fjsen.com/2022-12/01/content_31195504.htm
'Little Giant' unleashes great potential	http://money.fjsen.com/2022-12/01/content_31195194.htm	http://money.fjsen.com/2022-12/01/content_31195194.htm
Jinjiang Economic Development Zone was awarded the title of "Fujian Province Green Park"	http://qz.fjsen.com/2022-12/01/content_31194961.htm	http://qz.fjsen.com/2022-12/01/content_31194961.htm
Seize the time window and promote further economic stabilization and upward momentum - November National Economic and Social Development Scan	http://www.fjsen.com/2022-12/01/content_31194888.htm	http://www.fjsen.com/2022-12/01/content_31194888.htm
Fuzhou Intermediate People's Court held an online press conference on the 5th anniversary of the establishment of Fuzhou Intellectual Property Court	http://fz.fjsen.com/2022-12/01/content_31194857.htm	http://fz.fjsen.com/2022-12/01/content_31194857.htm
Ningde Power Battery Cluster Selected for National Advanced Manufacturing Industry Cluster List	http://nd.fjsen.com/2022-12/01/content_31194836.htm	http://nd.fjsen.com/2022-12/01/content_31194836.htm
Longyan: 'Little Giant' unleashes great potential	http://fjnews.fjsen.com/2022-12/01/content_31194651.htm	http://fjnews.fjsen.com/2022-12/01/content_31194651.htm
China (Fujian) Pilot Free Trade Zone Fuzhou Area promotes high-quality development through linkage innovation	http://www.518fuzhou.com/2022-11/30/content_31193884.htm	http://www.518fuzhou.com/2022-11/30/content_31193884.htm
The China (Fujian) Overseas Chinese Talent Exchange Event was held in Rong	http://overseas.fjsen.com/2022-11/30/content_31194347.htm	http://overseas.fjsen.com/2022-11/30/content_31194347.htm
Forge ahead with determination and build a high-quality development leading demonstration zone	http://money.fjsen.com/2022-11/30/content_31192598.htm	http://money.fjsen.com/2022-11/30/content_31192598.htm
Promote the green and low-carbon transformation and development of new energy storage	http://money.fjsen.com/2022-11/30/content_31192762.htm	http://money.fjsen.com/2022-11/30/content_31192762.htm
China International Brand Innovation Forum held in Quanzhou	http://qz.fjsen.com/2022-11/30/content_31193120.htm	http://qz.fjsen.com/2022-11/30/content_31193120.htm
Behind the repeated record breaking of offshore wind turbines	http://fjnews.fjsen.com/2022-11/30/content_31192929.htm	http://fjnews.fjsen.com/2022-11/30/content_31192929.htm
Striving for excellence, forging ahead with courage, and building a high-quality development leading demonstration zone - Interview with Cui Yonghui, member of the Standing Committee of the Provincial Party Committee and Secretary of the Xiamen Municipal Party Committee	http://fjnews.fjsen.com/2022-11/29/content_31191752.htm	http://fjnews.fjsen.com/2022-11/29/content_31191752.htm
The spirit of the 20th National Congress of the Communist Party of China has been implemented and blossomed at the grassroots level. Tang Xi, "National Youth Post Expert": Spread the voice of the Party to the front line of projects	http://fjnews.fjsen.com/2022-11/28/content_31191730.htm	http://fjnews.fjsen.com/2022-11/28/content_31191730.htm
Sanming Yong'an: Deep in Taoyuan, there is a new city with rapid development on the banks of the Yanjiang River	http://sm.fjsen.com/2022-11/28/content_31190589.htm	http://sm.fjsen.com/2022-11/28/content_31190589.htm
Helping to jointly build the "the Belt and Road" in depth and in reality (concerned by overseas Chinese)	http://www.fjsen.com/2022-11/28/content_31190794.htm	http://www.fjsen.com/2022-11/28/content_31190794.htm
Focus Interview | Green on the New Journey: The Foundation of High Quality Development	http://www.fjsen.com/2022-11/28/content_31190777.htm	http://www.fjsen.com/2022-11/28/content_31190777.htm
28 enterprises in Quanzhou join the national intellectual property team	http://money.fjsen.com/2022-11/25/content_31189402.htm	http://money.fjsen.com/2022-11/25/content_31189402.htm
Western High Court Meeting: This Year's 375th IPO Passes, China International Capital Corporation (CICC) Passes 18.5 Orders	http://money.fjsen.com/2022-11/25/content_31188471.htm	http://money.fjsen.com/2022-11/25/content_31188471.htm
Continued issuance of special bonds to stabilize growth	http://money.fjsen.com/2022-11/25/content_31188364.htm	http://money.fjsen.com/2022-11/25/content_31188364.htm
Xiamen issues implementation plan to implement measurement development plan	http://xm.fjsen.com/2022-11/25/content_31188591.htm	http://xm.fjsen.com/2022-11/25/content_31188591.htm
Xiamen Product Quality Supervision and Inspection Institute: Party building leads the aggregation of strength, civilization creation adds momentum	http://wmf.fjsen.com/topic/2022-11/24/content_31185834.htm	http://wmf.fjsen.com/topic/2022-11/24/content_31185834.htm
Made in Fujian, Shining in Qatar World Cup	http://fjnews.fjsen.com/2022-11/24/content_31187677.htm	http://fjnews.fjsen.com/2022-11/24/content_31187677.htm
Some provinces have obtained advance approval quotas for special bonds to continue issuing and stabilize growth	http://news.fjsen.com/2022-11/24/content_31187576.htm	http://news.fjsen.com/2022-11/24/content_31187576.htm
Fujian Forestry Vocational and Technical College: Using practical actions to polish the new style and positive atmosphere of Fujian's "business card"	http://i.fjsen.com/2022-11/23/content_31186455.htm	http://i.fjsen.com/2022-11/23/content_31186455.htm
Quanzhou: Strengthening Production and Revitalizing the City, Gathering Strength and Responsibility	http://qz.fjsen.com/2022-11/23/content_31186355.htm	http://qz.fjsen.com/2022-11/23/content_31186355.htm
The Standing Committee of the Ningde Municipal Party Committee held a meeting to convey and study the spirit of Zhou Zuyi, the Secretary of the Provincial Party Committee,'s research speech in Ning	http://nd.fjsen.com/2022-11/22/content_31185370.htm	http://nd.fjsen.com/2022-11/22/content_31185370.htm
In the first three quarters, listed companies in Fujian Province invested over 29.1 billion yuan in research and development	http://money.fjsen.com/2022-11/21/content_31182635.htm	http://money.fjsen.com/2022-11/21/content_31182635.htm
2022 Cross Strait Urban Environment Summit Forum held in Xiamen	http://xm.fjsen.com/2022-11/20/content_31183852.htm	http://xm.fjsen.com/2022-11/20/content_31183852.htm
From January to October, the added value of Fujian's large-scale industries increased by 6.4% year-on-year	http://fjnews.fjsen.com/2022-11/19/content_31183290.htm	http://fjnews.fjsen.com/2022-11/19/content_31183290.htm
In the first three quarters, the R&D investment of listed companies in Fujian exceeded 29.1 billion yuan, a year-on-year increase of 46%	http://www.518fuzhou.com/2022-11/18/content_31182850.htm	http://www.518fuzhou.com/2022-11/18/content_31182850.htm
The 6th "Straits Cup" Innovation and Entrepreneurship Competition attracted nearly 6600 high-quality projects	http://qz.fjsen.com/2022-11/17/content_31181693.htm	http://qz.fjsen.com/2022-11/17/content_31181693.htm
Export Import Bank Fujian Branch actively supports advanced manufacturing enterprises to accelerate their development	http://money.fjsen.com/2022-11/17/content_31181969.htm	http://money.fjsen.com/2022-11/17/content_31181969.htm
Sanming: Electricity surges, green city shines brightly	http://sm.fjsen.com/2022-11/16/content_31180582.htm	http://sm.fjsen.com/2022-11/16/content_31180582.htm
Smooth delivery during peak season to meet the demand	http://money.fjsen.com/2022-11/15/content_31179498.htm	http://money.fjsen.com/2022-11/15/content_31179498.htm
Forge ahead and build new achievements, bravely stand at the forefront of the trend, and write a new chapter - Industrial Bank Nanping Branch is the main force of finance, fully serving Nanping's all-round high-quality development and surpassing	http://www.fjsen.com/content/2022-11/15/content_31179682.htm	http://www.fjsen.com/content/2022-11/15/content_31179682.htm
Thoroughly implement the spirit of the 20th National Congress of the Communist Party of China and build a beautiful Fujian where humans and nature coexist harmoniously	http://fjnews.fjsen.com/2022-11/15/content_31179127.htm	http://fjnews.fjsen.com/2022-11/15/content_31179127.htm
"Mount Wuyi Pure Electric Bus Line" officially opened	http://np.fjsen.com/2022-11/14/content_31178987.htm	http://np.fjsen.com/2022-11/14/content_31178987.htm
Celebrating the 20th National Congress | Attracting Financial Vitality to Nourish Mulan on Both Sides of the Taiwan Strait	http://money.fjsen.com/2022-11/14/content_31178422.htm	http://money.fjsen.com/2022-11/14/content_31178422.htm
Striving forward at the right time, realizing actions and gathering momentum to do so	http://money.fjsen.com/2022-11/14/content_31178424.htm	http://money.fjsen.com/2022-11/14/content_31178424.htm
Head of State Diplomacy | China Indonesia Community of Shared Future Embarks on the 'High Speed Train'	http://www.fjsen.com/2022-11/14/content_31178414.htm	http://www.fjsen.com/2022-11/14/content_31178414.htm
"Pioneering" and "Making troubles in the sea" break out into a Xintiandi of digital economy	http://nd.fjsen.com/2022-11/14/content_31178335.htm	http://nd.fjsen.com/2022-11/14/content_31178335.htm
Making high-quality development the primary task of comprehensively building a socialist modernized country - Observing the implementation of the spirit of the 20th National Congress of the Communist Party of China in various regions and focusing on economic construction	http://www.fjsen.com/2022-11/14/content_31178162.htm	http://www.fjsen.com/2022-11/14/content_31178162.htm
Jointly build high-quality development of the "the Belt and Road" between China and Indonesia	http://www.fjsen.com/2022-11/13/content_31177653.htm	http://www.fjsen.com/2022-11/13/content_31177653.htm
Sanming: Equipment Manufacturing Industry Increases Quantity and Quality	http://sm.fjsen.com/2022-11/12/content_31177228.htm	http://sm.fjsen.com/2022-11/12/content_31177228.htm
The final of the 6th "Strait Cup" Fujian (Jinjiang) Innovation and Entrepreneurship Competition has come to an end	http://qz.fjsen.com/2022-11/11/content_31177125.htm	http://qz.fjsen.com/2022-11/11/content_31177125.htm
Fujian participates in the CIIE both online and offline: Fill your shopping cart and expand your circle of friends	http://fjnews.fjsen.com/2022-11/11/content_31177138.htm	http://fjnews.fjsen.com/2022-11/11/content_31177138.htm
Longyan launches a large-scale investment promotion campaign to attract good businesses	http://ly.fjsen.com/2022-11/11/content_31175594.htm	http://ly.fjsen.com/2022-11/11/content_31175594.htm
Fuding: Integration of Industry, City, and Landscape, Creating New Momentum	http://nd.fjsen.com/2022-11/08/content_31173302.htm	http://nd.fjsen.com/2022-11/08/content_31173302.htm
County wide pilot project to create the 'Shanghang Model' for photovoltaic development	http://money.fjsen.com/2022-11/07/content_31172601.htm	http://money.fjsen.com/2022-11/07/content_31172601.htm
Power outage announcement	http://np.fjsen.com/2022-11/07/content_31172247.htm	http://np.fjsen.com/2022-11/07/content_31172247.htm
The added value of industrial enterprises above designated size in the province increased by 6.3% year-on-year in the first three quarters	http://fjnews.fjsen.com/2022-11/06/content_31171752.htm	http://fjnews.fjsen.com/2022-11/06/content_31171752.htm
Survey on the Power Battery Industry	http://money.fjsen.com/2022-11/04/content_31170329.htm	http://money.fjsen.com/2022-11/04/content_31170329.htm
Viewing "Ningde Intelligent Manufacturing" from SAIC Ningde Base	http://nd.fjsen.com/2022-11/04/content_31170970.htm	http://nd.fjsen.com/2022-11/04/content_31170970.htm
The operation of industrial enterprises above designated size in Fujian Province has significantly rebounded	http://overseas.fjsen.com/2022-11/04/content_31170843.htm	http://overseas.fjsen.com/2022-11/04/content_31170843.htm
In the first three quarters of this year, the GDP growth rate of 18 provinces exceeded the national growth rate of 3.0%	http://www.fjsen.com/2022-11/03/content_31170194.htm	http://www.fjsen.com/2022-11/03/content_31170194.htm
The 'Taibao Acceleration' in the New Pattern of High Quality Development of the Service Entity Economy	http://money.fjsen.com/2022-11/02/content_31169318.htm	http://money.fjsen.com/2022-11/02/content_31169318.htm
Sanming: Government and enterprises join hands to promote cooperation between Shanghai and Ming	http://fjnews.fjsen.com/2022-11/02/content_31168589.htm	http://fjnews.fjsen.com/2022-11/02/content_31168589.htm
Luo Yuan: Inefficially Changing Cages for Birds, Good Project 'Phoenix Comes to Live'	http://www.fzccpit.org/2022-10/31/content_31166829.htm	http://www.fzccpit.org/2022-10/31/content_31166829.htm
Fujian Provincial Institute of Metrology has successfully completed the evaluation of WTO/TBT standards for "DC electric vehicle charging stations"	http://www.fjsen.com/zhuanti/2022-10/31/content_31166797.htm	http://www.fjsen.com/zhuanti/2022-10/31/content_31166797.htm
Luo Yuan: Inefficially Changing Cages for Birds, Good Project 'Phoenix Comes to Live'	http://fjnews.fjsen.com/2022-10/31/content_31166473.htm	http://fjnews.fjsen.com/2022-10/31/content_31166473.htm
High end, green, intelligent, and cloud based development continue to deepen the field of new energy vehicles	http://pt.fjsen.com/xw/2022-10/30/content_31166277.htm	http://pt.fjsen.com/xw/2022-10/30/content_31166277.htm
Each county (city) and district in Fuzhou conveys, studies and implements the spirit of the 20th National Congress of the Communist Party of China	http://fz.fjsen.com/2022-10/27/content_31164106.htm	http://fz.fjsen.com/2022-10/27/content_31164106.htm
The industry standard "Testing Method for Radiation Performance of UV Aging Test Chamber for Photovoltaics" drafted by Fujian Institute of Metrology has been released	http://www.fjsen.com/zhuanti/2022-10/26/content_31163366.htm	http://www.fjsen.com/zhuanti/2022-10/26/content_31163366.htm
Breakthrough | Wind Power Symphony, Xinghua Bay Plays Strong Wind Song	http://fjnews.fjsen.com/2022-10/24/content_31162093.htm	http://fjnews.fjsen.com/2022-10/24/content_31162093.htm
Fujian Branch of Export Import Bank provides policy finance support for the research and production of graphite negative electrode materials industry	http://money.fjsen.com/2022-10/24/content_31162030.htm	http://money.fjsen.com/2022-10/24/content_31162030.htm
Longyan: Focus on industries and projects	http://overseas.fjsen.com/2022-10/24/content_31160036.htm	http://overseas.fjsen.com/2022-10/24/content_31160036.htm
On site reporting from various reporter stations of Fujian Daily - Unity and struggle to create a better future	http://fjnews.fjsen.com/2022-10/24/content_31161068.htm	http://fjnews.fjsen.com/2022-10/24/content_31161068.htm
Wireless Media Meeting: 334th IPO approved this year, CITIC Securities has invested 29.5 times	http://money.fjsen.com/2022-10/21/content_31159358.htm	http://money.fjsen.com/2022-10/21/content_31159358.htm
Using numbers to attract intelligence, Putian's high-end equipment industry takes off again	http://money.fjsen.com/2022-10/21/content_31158913.htm	http://money.fjsen.com/2022-10/21/content_31158913.htm
Ping Shan Jun | Openness never stops, set sail again	http://www.fjnjnews.cn/2022-10/21/content_31159841.htm	http://www.fjnjnews.cn/2022-10/21/content_31159841.htm
Agricultural Bank of China Nanping Branch accelerates the development of green finance to support the real economy	http://np.fjsen.com/2022-10/21/content_31159271.htm	http://np.fjsen.com/2022-10/21/content_31159271.htm
Witnessing the extraordinary decade, observing the "Ningde Practice" from the hot words in the 20th National Congress report	http://nd.fjsen.com/2022-10/21/content_31159822.htm	http://nd.fjsen.com/2022-10/21/content_31159822.htm
The first China Europe (Xiamen) cold chain special train in the province has been launched	http://xm.fjsen.com/2022-10/21/content_31159651.htm	http://xm.fjsen.com/2022-10/21/content_31159651.htm
Openness never stops, set sail again	http://www.518fuzhou.com/2022-10/20/content_31159111.htm	http://www.518fuzhou.com/2022-10/20/content_31159111.htm
Interview with Yu Hong, a representative of the 20th National Congress of the Communist Party of China | Guarding one shift and lighting up ten thousand beams of light	http://www.fjnjnews.cn/2022-10/20/content_31159460.htm	http://www.fjnjnews.cn/2022-10/20/content_31159460.htm
SAIC Ningde Base: Vigorously developing new energy vehicles	http://nd.fjsen.com/2022-10/20/content_31159002.htm	http://nd.fjsen.com/2022-10/20/content_31159002.htm
The "Made in Fuzhou" Light Storage Charging and Inspection Intelligent Supercharging Station Debuts in Ningde	http://fz.fjsen.com/2022-10/20/content_31158619.htm	http://fz.fjsen.com/2022-10/20/content_31158619.htm
Fujian Proud Ocean Power "series of feature films: Drawing a new look of deep blue and playing a new chapter in the ocean	http://www.fzccpit.org/2022-10/19/content_31158155.htm	http://www.fzccpit.org/2022-10/19/content_31158155.htm
Through the integration of knowledge and practice, we aim to provide high-quality services to the Industrial and Commercial Bank of China Ningde Branch and support local economic development	http://money.fjsen.com/2022-10/19/content_31158213.htm	http://money.fjsen.com/2022-10/19/content_31158213.htm
Nearly 80% of surveyed college students are willing to contribute to climate protection	http://www.fjsen.com/2022-10/19/content_31158115.htm	http://www.fjsen.com/2022-10/19/content_31158115.htm
Ningde State owned Enterprises: Focusing on Strengthening, Optimizing, Expanding, Promoting Development, Improving Quality and Efficiency	http://nd.fjsen.com/2022-10/19/content_31157977.htm	http://nd.fjsen.com/2022-10/19/content_31157977.htm
The 'Four Needs' Promote the Achievement of the' Dual Carbon 'Goal	http://money.fjsen.com/2022-10/18/content_31156860.htm	http://money.fjsen.com/2022-10/18/content_31156860.htm
The first standardized design "Optical Storage Charging Inspection Intelligent Supercharging Station" in China has been completed and put into use in the lithium battery town of Ningde City	http://nd.fjsen.com/2022-10/18/content_31157010.htm	http://nd.fjsen.com/2022-10/18/content_31157010.htm
Composing a more brilliant chapter of socialism with Chinese characteristics in the new era - A summary of the discussion of the 20th National Congress report by the delegates of the Communist Party of China	http://wmf.fjsen.com/2022-10/18/content_31156821.htm	http://wmf.fjsen.com/2022-10/18/content_31156821.htm
The first standardized design "Optical Storage Charging and Inspection Intelligent Supercharging Station" in China has been put into use in Ningde	http://fjnews.fjsen.com/2022-10/18/content_31156682.htm	http://fjnews.fjsen.com/2022-10/18/content_31156682.htm
Industrial Strong City "Strengthens Muscle and Bone" Industrial Economy "Accelerates Running	http://np.fjsen.com/2022-10/18/content_31156689.htm	http://np.fjsen.com/2022-10/18/content_31156689.htm
Guarding one shift and lighting up ten thousand beams of light - Interview with Yu Hong, a representative of the 20th National Congress	http://fjnews.fjsen.com/2022-10/18/content_31156593.htm	http://fjnews.fjsen.com/2022-10/18/content_31156593.htm
The first standardized design "Optical Storage Charging and Inspection Intelligent Supercharging Station" in China has been built and put into use in Ningde	http://nd.fjsen.com/2022-10/17/content_31156200.htm	http://nd.fjsen.com/2022-10/17/content_31156200.htm
Longxun Shares Passes Meeting: 329th IPO Passed This Year, CICC Passes 15.5 Orders	http://money.fjsen.com/2022-10/17/content_31153714.htm	http://money.fjsen.com/2022-10/17/content_31153714.htm
Persist unwaveringly on the path of innovation	http://money.fjsen.com/2022-10/17/content_31154239.htm	http://money.fjsen.com/2022-10/17/content_31154239.htm
The report of the 20th National Congress of the Communist Party of China has sparked a warm response among the "Golden Doll" enterprises in Ningde City	http://nd.fjsen.com/2022-10/17/content_31155877.htm	http://nd.fjsen.com/2022-10/17/content_31155877.htm
Standing at the forefront of the trend, pursuing dreams, cultivating and painting the chapter of "prosperity" - Overview of Industrial Bank Ningde Branch's service to local economic and social development	http://nd.fjsen.com/2022-10/17/content_31155834.htm	http://nd.fjsen.com/2022-10/17/content_31155834.htm
Research Report on the Development of Hydrogen Energy Industry in Fujian Province	http://www.fjsen.com/2022-10/16/content_31155572.htm	http://www.fjsen.com/2022-10/16/content_31155572.htm
The Dream Summit Forum on Promoting Rural Revitalization through the Integration of Three Teas and the Fourth Zhang Tianfu Tea Study Seminar were held at Ningde Vocational and Technical College	http://nd.fjsen.com/2022-10/16/content_31155315.htm	http://nd.fjsen.com/2022-10/16/content_31155315.htm
[Celebrating the 20th National Congress of the Communist Party of China Special Issue] Extraordinary · Striving | Leapfrogging Development, Southeast Tides Racing and Setting Sail	http://fjnews.fjsen.com/2022-10/16/content_31155254.htm	http://fjnews.fjsen.com/2022-10/16/content_31155254.htm
Fu'an: Intelligent Manufacturing Upgrade of Electric Machinery and Electrical Appliances	http://nd.fjsen.com/2022-10/15/content_31162494.htm	http://nd.fjsen.com/2022-10/15/content_31162494.htm
Fujian Exhibition Area - Focusing on the Theme of "Advancing in the New Era" Achievement Exhibition of "Blessings" - Blessings and Land	http://fjnews.fjsen.com/2022-10/15/content_31154913.htm	http://fjnews.fjsen.com/2022-10/15/content_31154913.htm
Celebrating the 20th National Congress | Fu'an: Upgrading of Intelligent Manufacturing of Electric Machinery and Appliances	http://fjnews.fjsen.com/2022-10/15/content_31154906.htm	http://fjnews.fjsen.com/2022-10/15/content_31154906.htm
Attracting financial vitality to nourish both sides of the Mulan Strait	http://money.fjsen.com/2022-10/14/content_31154509.htm	http://money.fjsen.com/2022-10/14/content_31154509.htm
Construction Bank Ningde Branch: Finance is always at the heart of the early Republic of China	http://nd.fjsen.com/2022-10/14/content_31154316.htm	http://nd.fjsen.com/2022-10/14/content_31154316.htm
Zhangpu: Vibrant New Production City, Ecological Rich Homeland	http://fjnews.fjsen.com/2022-10/14/content_31153977.htm	http://fjnews.fjsen.com/2022-10/14/content_31153977.htm
Golden Dragon Bus: Seize the opportunity of green intelligence and strive for a "beautiful travel community"	http://www.fjsen.com/2022-10/13/content_31153805.htm	http://www.fjsen.com/2022-10/13/content_31153805.htm
Celebrating the 20th National Congress of the Communist Party of China | Golden Dragon Bus: Choosing the right direction to plan for the overall situation, exploring the new era of enterprise gaps	http://www.fjsen.com/2022-10/13/content_31153804.htm	http://www.fjsen.com/2022-10/13/content_31153804.htm
The opening ceremony of the "Fujian Mountains, Fujian Waters, and New Things - Welcoming the 20th National Congress of the Communist Party of China Theme Achievement Exhibition"	http://women.fjsen.com/2022-10/13/content_31153773.htm	http://women.fjsen.com/2022-10/13/content_31153773.htm
Central enterprises enter Fujian to join hands and achieve win-win results	http://money.fjsen.com/2022-10/12/content_31152159.htm	http://money.fjsen.com/2022-10/12/content_31152159.htm
Fujian Information Vocational and Technical College Automotive Building is put into use	http://ptxw.fjsen.com/2022-10/12/content_31151494.htm	http://ptxw.fjsen.com/2022-10/12/content_31151494.htm
Xiamen Torch High tech Zone: Targeting "High" and "New" to Drive New Engines	http://fjnews.fjsen.com/2022-10/12/content_31151999.htm	http://fjnews.fjsen.com/2022-10/12/content_31151999.htm
Celebrating the 20th National Congress | Central Enterprises Entering Fujian and Joining Hands for Win Win Cooperation	http://fjnews.fjsen.com/2022-10/12/content_31151892.htm	http://fjnews.fjsen.com/2022-10/12/content_31151892.htm
The Fujian Provincial Committee of the Zhigong Party organized a visit to the "Fujian Mountains, Fujian Waters, and New Things - Welcoming the 20th National Congress of the Communist Party of China Theme Achievement Exhibition"	http://www.fjzg.gov.cn/2022-10/11/content_31154355.htm	http://www.fjzg.gov.cn/2022-10/11/content_31154355.htm
In the past decade of China, the development of the Min dialect among the local people. "Chen Kun:" With the help of overseas Chinese, I believe that the development of Fujian and Hong Kong will be better	http://hk.fjsen.com/2022-10/11/content_31151805.htm	http://hk.fjsen.com/2022-10/11/content_31151805.htm
Fuzhou issues notice to build this' national demonstration '!	http://www.fzccpit.org/2022-10/11/content_31151414.htm	http://www.fzccpit.org/2022-10/11/content_31151414.htm
Leading the green, low-carbon and circular development of manufacturing industry with new development concepts	http://fjnews.fjsen.com/2022-10/11/content_31151167.htm	http://fjnews.fjsen.com/2022-10/11/content_31151167.htm
Qiaolong Emergency Meeting: The 328th IPO approved this year, with 10 recommended by Changjiang	http://money.fjsen.com/2022-10/11/content_31151251.htm	http://money.fjsen.com/2022-10/11/content_31151251.htm
Defu Technology Meets: This Year's 327th IPO Passes, Guotai Junan Passes 22 Orders	http://money.fjsen.com/2022-10/11/content_31151243.htm	http://money.fjsen.com/2022-10/11/content_31151243.htm
Accelerate the construction of the "foundation" for the new digital economy infrastructure in our province	http://money.fjsen.com/2022-10/11/content_31151276.htm	http://money.fjsen.com/2022-10/11/content_31151276.htm
Expand, strengthen and optimize the digital economy, empower all-round promotion of high-quality development, and surpass it	http://fjnews.fjsen.com/2022-10/11/content_31151157.htm	http://fjnews.fjsen.com/2022-10/11/content_31151157.htm
High tech showcases the hard power of Fujian province - a close-up of the "Fujian Mountains, Fujian Waters, and New Things" themed achievement exhibition	http://wmf.fjsen.com/2022-10/11/content_31151104.htm	http://wmf.fjsen.com/2022-10/11/content_31151104.htm
Fujian: Green Economy Soars with Momentum	http://www.fzccpit.org/2022-10/10/content_31150423.htm	http://www.fzccpit.org/2022-10/10/content_31150423.htm
Liansheng Technology Meets: This Year's 321st IPO Passes, Guotai Junan Passes 21 Orders	http://money.fjsen.com/2022-10/10/content_31150080.htm	http://money.fjsen.com/2022-10/10/content_31150080.htm
Green economy takes off with momentum	http://money.fjsen.com/2022-10/10/content_31150198.htm	http://money.fjsen.com/2022-10/10/content_31150198.htm
Xiamen Xiang'an: Courageous and forward, daring to take the lead, striving to sail and seek new chapters	http://fjnews.fjsen.com/2022-10/10/content_31150061.htm	http://fjnews.fjsen.com/2022-10/10/content_31150061.htm
Celebrating the 20th National Congress | Fujian: Green Economy Soars with Momentum	http://wmf.fjsen.com/2022-10/10/content_31149974.htm	http://wmf.fjsen.com/2022-10/10/content_31149974.htm
Tong'an, Xiamen: a modern new city rising on the mudflat	http://overseas.fjsen.com/2022-10/09/content_31149089.htm	http://overseas.fjsen.com/2022-10/09/content_31149089.htm
Shanghang: New industries, new mountainous areas, new development	http://ly.fjsen.com/2022-10/09/content_31149510.htm	http://ly.fjsen.com/2022-10/09/content_31149510.htm
Changhua Chemical Meets: This Year's 319th IPO Passes, Dongwu Securities Passes 9 Orders	http://money.fjsen.com/2022-10/09/content_31148099.htm	http://money.fjsen.com/2022-10/09/content_31148099.htm
Combining internal and external cultivation to gather talented individuals, adding momentum to the development of the industry	http://money.fjsen.com/2022-10/09/content_31147960.htm	http://money.fjsen.com/2022-10/09/content_31147960.htm
Pingtan: Promoting Tourism through Sports, Tourism Island Heading towards the New Blue Ocean	http://ptxw.fjsen.com/2022-10/08/content_31148353.htm	http://ptxw.fjsen.com/2022-10/08/content_31148353.htm
Fujian is listed as a pilot area for green and intelligent development of inland ships	http://fjnews.fjsen.com/2022-10/06/content_31147058.htm	http://fjnews.fjsen.com/2022-10/06/content_31147058.htm
Fujian: Combining internal and external cultivation to gather talented individuals, adding momentum to the development of the industry	http://fjnews.fjsen.com/2022-10/06/content_31147057.htm	http://fjnews.fjsen.com/2022-10/06/content_31147057.htm
Appreciate great achievements and draw strength for progress	http://www.fjsen.com/2022-10/05/content_31146948.htm	http://www.fjsen.com/2022-10/05/content_31146948.htm
Building nests, attracting phoenixes, strengthening industrial agglomeration, developing and revitalizing cities - Huian promotes the standardization construction of industrial parks in depth	http://qz.fjsen.com/2022-10/02/content_31144080.htm	http://qz.fjsen.com/2022-10/02/content_31144080.htm
Gathering Wealth, Promoting Development for the People, Striving to Write a New Chapter	http://nd.fjsen.com/2022-10/02/content_31146862.htm	http://nd.fjsen.com/2022-10/02/content_31146862.htm
Fujian: Accelerate data sharing applications, continuously deepen digital empowerment	http://wmf.fjsen.com/2022-10/02/content_31145928.htm	http://wmf.fjsen.com/2022-10/02/content_31145928.htm
Intensifying policy implementation to solidify the foundation of economic recovery - September scan of economic and social development across the country	http://news.fjsen.com/2022-10/01/content_31145681.htm	http://news.fjsen.com/2022-10/01/content_31145681.htm
The Fujian Guangdong Power Interconnection Project has been completed and put into operation	http://overseas.fjsen.com/2022-09/30/content_31145355.htm	http://overseas.fjsen.com/2022-09/30/content_31145355.htm
National Office commended! Fujian has 3 items on the list →	http://wmf.fjsen.com/2022-09/30/content_31144468.htm	http://wmf.fjsen.com/2022-09/30/content_31144468.htm
Financing attracts wisdom, Industrial Bank Fuzhou Branch helps accelerate the quality improvement of major project construction in Fuzhou	http://money.fjsen.com/2022-09/30/content_31145255.htm	http://money.fjsen.com/2022-09/30/content_31145255.htm
Fujian: Deeply implementing the strategy of building a strong manufacturing province and accelerating the construction of a modern industrial system	http://fjnews.fjsen.com/2022-09/30/content_31144526.htm	http://fjnews.fjsen.com/2022-09/30/content_31144526.htm
The construction of 'Fuzhou on the Sea' has opened up a new path for carbon emissions	http://www.fzccpit.org/2022-09/29/content_31144204.htm	http://www.fzccpit.org/2022-09/29/content_31144204.htm
In the past decade, Fujian has been selected as one of the 19 "2022 Top 500 Chinese Private Enterprises" for high-quality development of industry and information technology	http://fjnews.fjsen.com/2022-09/29/content_31144250.htm	http://fjnews.fjsen.com/2022-09/29/content_31144250.htm
Fujian increases the development of the "electric Fujian" industry, promoting a total of 312000 new energy vehicles throughout the province	http://fjnews.fjsen.com/2022-09/29/content_31144249.htm	http://fjnews.fjsen.com/2022-09/29/content_31144249.htm
Huang Youjia, a native of Fujian in Hong Kong, said, "The economic development of Fujian is indeed remarkable	http://hk.fjsen.com/2022-09/29/content_31143514.htm	http://hk.fjsen.com/2022-09/29/content_31143514.htm
Fujian Province and State Power Investment Corporation signed an agreement to deepen industrial development cooperation	http://women.fjsen.com/2022-09/29/content_31144264.htm	http://women.fjsen.com/2022-09/29/content_31144264.htm
Celebrating the 20th National Congress | "Advancing in the New Era" Theme Achievement Exhibition Held in Beijing, Fujian Exhibition Area Debuts Freshly	http://wmf.fjsen.com/2022-09/29/content_31143613.htm	http://wmf.fjsen.com/2022-09/29/content_31143613.htm
Postal Savings Bank of China Xiamen Branch's "Assisting Enterprises to Relieve Difficulties and Warmth Postal Me" Action Shows Actual Results	http://xm.fjsen.com/2022-09/29/content_31143870.htm	http://xm.fjsen.com/2022-09/29/content_31143870.htm
Ningde is a city full of love! Liu Guanyong returned from completing the transmission of "new energy" and received a warm welcome	http://ndwm.fjsen.com/2022-09/28/content_31143473.htm	http://ndwm.fjsen.com/2022-09/28/content_31143473.htm
Leaders from Shunchang County led a team to inspect and guide safety production work in areas such as gas and construction sites	http://www.fjsen.com/zhuanti/2022-09/28/content_31141940.htm	http://www.fjsen.com/zhuanti/2022-09/28/content_31141940.htm
Fujian wind power is so dazzling	http://money.fjsen.com/2022-09/28/content_31142139.htm	http://money.fjsen.com/2022-09/28/content_31142139.htm
Electric power empowers the flourishing development of Xianggao New City	http://xm.fjsen.com/2022-09/28/content_31142774.htm	http://xm.fjsen.com/2022-09/28/content_31142774.htm
Fujian signs contract with State Power Investment Corporation	http://fjnews.fjsen.com/2022-09/27/content_31142548.htm	http://fjnews.fjsen.com/2022-09/27/content_31142548.htm
2022 Top 100 Private Enterprises in Fujian Province released: entry threshold of 4.3 billion yuan	http://www.fzccpit.org/2022-09/27/content_31142043.htm	http://www.fzccpit.org/2022-09/27/content_31142043.htm
The world's first and Asia's largest! Fujian wind power is so dazzling	http://ptxw.fjsen.com/2022-09/27/content_31142052.htm	http://ptxw.fjsen.com/2022-09/27/content_31142052.htm
Dongqiao held a talent project "unveiling the list and leading the way" market day event	http://nd.fjsen.com/2022-09/27/content_31142003.htm	http://nd.fjsen.com/2022-09/27/content_31142003.htm
2022 Top 100 Private Enterprises in Fujian Province released: entry threshold of 4.3 billion yuan. Qingtuo Group ranks first with a revenue of over 160 billion yuan	http://fjnews.fjsen.com/2022-09/26/content_31141225.htm	http://fjnews.fjsen.com/2022-09/26/content_31141225.htm
Livelihood Health Conference: 316th IPO approved this year, Caitong Securities has passed 4 orders	http://money.fjsen.com/2022-09/26/content_31141290.htm	http://money.fjsen.com/2022-09/26/content_31141290.htm
Xiapu: Striving to be a pioneer in reform and innovation, bravely embarking on new paths and composing new chapters	http://nd.fjsen.com/2022-09/23/content_31139524.htm	http://nd.fjsen.com/2022-09/23/content_31139524.htm
China Merchants Bank Fuzhou Branch: Smooth financing channels, support high-quality development of the real economy	http://money.fjsen.com/2022-09/23/content_31139358.htm	http://money.fjsen.com/2022-09/23/content_31139358.htm
State Grid Fujian Electric Power: Meeting peak summer demand, ensuring power supply, guarding coolness, and demonstrating responsibility	http://fjnews.fjsen.com/2022-09/23/content_31139261.htm	http://fjnews.fjsen.com/2022-09/23/content_31139261.htm
Fujian Mountain, Fujian Water, and Things: Huaxin · Extraordinary Decade | Rise of the "Five Blessings New City" and Singing "Family Fu'an"	http://fjnews.fjsen.com/2022-09/23/content_31139039.htm	http://fjnews.fjsen.com/2022-09/23/content_31139039.htm
Yanping: Deepening and solidifying the promotion of green and high-quality development	http://np.fjsen.com/2022-09/23/content_31139107.htm	http://np.fjsen.com/2022-09/23/content_31139107.htm
The overall level of comprehensive transportation development in Fujian has advanced to the forefront of the country	http://wmf.fjsen.com/2022-09/22/content_31138100.htm	http://wmf.fjsen.com/2022-09/22/content_31138100.htm
Celebrating the 20th National Congress of the Communist Party of China | Fujian: Leading the Way in Innovative Development	http://wmf.fjsen.com/2022-09/22/content_31138092.htm	http://wmf.fjsen.com/2022-09/22/content_31138092.htm
In the past decade, China's ecological civilization construction has undergone historic, turning point, and global changes	http://news.fjsen.com/2022-09/22/content_31138480.htm	http://news.fjsen.com/2022-09/22/content_31138480.htm
Fujian: Leading the way in innovative development	http://money.fjsen.com/2022-09/22/content_31138365.htm	http://money.fjsen.com/2022-09/22/content_31138365.htm
Ningde: Building a lithium battery city that leads the world in all aspects	http://nd.fjsen.com/2022-09/22/content_31138044.htm	http://nd.fjsen.com/2022-09/22/content_31138044.htm
Crossing mountains and seas, bravely becoming the pioneer of the new Fujian	http://fjnews.fjsen.com/2022-09/22/content_31137898.htm	http://fjnews.fjsen.com/2022-09/22/content_31137898.htm
Record of the special press conference of the Provincial Department of Transport on the theme of "Remembering the Mission and Striving for the People" and answering questions from reporters	http://fjnews.fjsen.com/2022-09/21/content_31137851.htm	http://fjnews.fjsen.com/2022-09/21/content_31137851.htm
The total investment amount of signed projects at the 19th East China International Fair has reached a new high	http://www.fzccpit.org/2022-09/21/content_31137085.htm	http://www.fzccpit.org/2022-09/21/content_31137085.htm
From January to August, the industrial production in Fujian Province remained stable with a slight increase. The added value of industrial enterprises above designated size increased by 6.0% year-on-year	http://overseas.fjsen.com/2022-09/21/content_31136473.htm	http://overseas.fjsen.com/2022-09/21/content_31136473.htm
Enhance the independent innovation capability of Fujian's industrial and supply chains	http://money.fjsen.com/2022-09/21/content_31136148.htm	http://money.fjsen.com/2022-09/21/content_31136148.htm
The 'dual carbon' goal broadens the growth space of nuclear power	http://money.fjsen.com/2022-09/21/content_31136158.htm	http://money.fjsen.com/2022-09/21/content_31136158.htm
Fujian Province issues a reward fund of 100 million yuan for R&D investment in technology small giant enterprises	http://fjnews.fjsen.com/2022-09/21/content_31136633.htm	http://fjnews.fjsen.com/2022-09/21/content_31136633.htm
Trillion Quanzhou: Private Economy Achieves Urban Miracle	http://qz.fjsen.com/2022-09/20/content_31135725.htm	http://qz.fjsen.com/2022-09/20/content_31135725.htm
The Shanghai expert research team conducted a special research on paired cooperation in Sanming City	http://sm.fjsen.com/2022-09/20/content_31135739.htm	http://sm.fjsen.com/2022-09/20/content_31135739.htm
Power Transmission Meeting: 308th IPO approved this year, CITIC Construction has invested 27.5 times	http://money.fjsen.com/2022-09/19/content_31135186.htm	http://money.fjsen.com/2022-09/19/content_31135186.htm
Fuding carburetor: the billion dollar industry faces difficulties with "intelligence"	http://money.fjsen.com/2022-09/19/content_31135028.htm	http://money.fjsen.com/2022-09/19/content_31135028.htm
A blueprint drawn to the new city on the coast of the East China Sea	http://fz.fjsen.com/2022-09/19/content_31134798.htm	http://fz.fjsen.com/2022-09/19/content_31134798.htm
The Power of Power Construction Shines in Fujian Province - Overview of Fujian Power Construction's Deep Integration into Fujian's Economic and Social Development	http://fjnews.fjsen.com/2022-09/19/content_31134633.htm	http://fjnews.fjsen.com/2022-09/19/content_31134633.htm
Promoting the 'Jinjiang Experience' and Stimulating the Innovation Momentum of Private Enterprises	http://www.fjsen.com/content/2022-09/17/content_31133386.htm	http://www.fjsen.com/content/2022-09/17/content_31133386.htm
Jinquan Shares Passes Meeting: This Year's 303rd IPO Passes, Guojin Securities Passes 16 Orders	http://money.fjsen.com/2022-09/16/content_31133680.htm	http://money.fjsen.com/2022-09/16/content_31133680.htm
Great Wall Information Meeting: 307th IPO approved this year, China Merchants Securities has passed 8 orders	http://money.fjsen.com/2022-09/16/content_31133691.htm	http://money.fjsen.com/2022-09/16/content_31133691.htm
Hetai Electromechanical Meets: 304th IPO Passed This Year, Minsheng Securities Passes 18 Orders	http://money.fjsen.com/2022-09/16/content_31133620.htm	http://money.fjsen.com/2022-09/16/content_31133620.htm
Zhidi Technology Meets: This Year's 305th IPO Passes, Guotai Junan Passes 19 Orders	http://money.fjsen.com/2022-09/16/content_31133690.htm	http://money.fjsen.com/2022-09/16/content_31133690.htm
Zhangpu: Leading the way in industrial economy and carrying the weight of characteristic industries	http://zzpd.fjsen.com/2022-09/15/content_31132762.htm	http://zzpd.fjsen.com/2022-09/15/content_31132762.htm
Feinan Resources Meeting: 300th Xiangcai Securities IPO Passes First Order This Year	http://money.fjsen.com/2022-09/15/content_31132596.htm	http://money.fjsen.com/2022-09/15/content_31132596.htm
Longyan: Make every effort to promote the construction of a high-quality development demonstration zone in the revolutionary old areas of western Fujian	http://ly.fjsen.com/2022-09/15/content_31132264.htm	http://ly.fjsen.com/2022-09/15/content_31132264.htm
How much does your car cost?	http://news.fjsen.com/2022-09/15/content_31132054.htm	http://news.fjsen.com/2022-09/15/content_31132054.htm
Sanming: Striving to write a new chapter of high-quality industrial development	http://sm.fjsen.com/2022-09/14/content_31130909.htm	http://sm.fjsen.com/2022-09/14/content_31130909.htm
Yin Li and Zhao Long meet with guests from China General Nuclear Power Corporation and China Datang Corporation	http://fjnews.fjsen.com/2022-09/14/content_31130782.htm	http://fjnews.fjsen.com/2022-09/14/content_31130782.htm
The fruitful achievements of "Picking Stars and Moon" Zhangzhou Changtai Industry's "Chain Casting" Record	http://zzpd.fjsen.com/2022-09/13/content_31130406.htm	http://zzpd.fjsen.com/2022-09/13/content_31130406.htm
Changtai: Financial support continuously helps enterprises develop without stopping	http://zzpd.fjsen.com/2022-09/13/content_31130075.htm	http://zzpd.fjsen.com/2022-09/13/content_31130075.htm
The total amount of contracts signed at the Fuzhou Foreign Investment Project Matchmaking Symposium exceeded 10 billion yuan	http://www.fzccpit.org/2022-09/13/content_31130597.htm	http://www.fzccpit.org/2022-09/13/content_31130597.htm
This year's Investment Fair in Xiamen signed 337 investment projects with a total investment of 309.6 billion yuan	http://www.518fuzhou.com/2022-09/13/content_31130503.htm	http://www.518fuzhou.com/2022-09/13/content_31130503.htm
The Investment and Trade Fair has conveyed a signal of China's support for the development of foreign enterprises	http://www.fjsen.com/2022-09/13/content_31130529.htm	http://www.fjsen.com/2022-09/13/content_31130529.htm
Pingtan: Playing the Song of the Sea in Protection and Development	http://ptxw.fjsen.com/2022-09/13/content_31129610.htm	http://ptxw.fjsen.com/2022-09/13/content_31129610.htm
The 'Golden Key' unlocks the door to investing in the Chinese market	http://www.fjsen.com/2022-09/13/content_31130231.htm	http://www.fjsen.com/2022-09/13/content_31130231.htm
Pingtan promotes marine ecological restoration and develops marine economy	http://wmf.fjsen.com/2022-09/12/content_31129667.htm	http://wmf.fjsen.com/2022-09/12/content_31129667.htm
Ningde: Dance Industry Chain Strengthens' Golden Doll '	http://fjnews.fjsen.com/2022-09/12/content_31129527.htm	http://fjnews.fjsen.com/2022-09/12/content_31129527.htm
The '98' Investment and Trade Fair: Attracting Large Enterprises, Attracting Strong Forces, Adding Vitality, and Promoting Open Development with Greater Momentum	http://fjnews.fjsen.com/2022-09/10/content_31129105.htm	http://fjnews.fjsen.com/2022-09/10/content_31129105.htm
Motivate enterprises to strengthen basic research	http://money.fjsen.com/2022-09/09/content_31128470.htm	http://money.fjsen.com/2022-09/09/content_31128470.htm
Double gold overlay, the open door opens wider and wider	http://money.fjsen.com/2022-09/09/content_31128465.htm	http://money.fjsen.com/2022-09/09/content_31128465.htm
Sharing the Opportunities of Digital Economy and Embracing a Green Development Future - Observations from the 2022 International Investment Forum	http://www.fzccpit.org/2022-09/09/content_31128721.htm	http://www.fzccpit.org/2022-09/09/content_31128721.htm
During the Investment and Trade Fair, Xiamen Xiang'an District signed 33 projects with a total investment of 51.8 billion yuan	http://xm.fjsen.com/2022-09/09/content_31128406.htm	http://xm.fjsen.com/2022-09/09/content_31128406.htm
The total number of signed projects in Tong'an District, Xiamen City has reached 31, with a total investment of 52.8 billion yuan	http://xm.fjsen.com/2022-09/09/content_31127942.htm	http://xm.fjsen.com/2022-09/09/content_31127942.htm
Ma Wei is determined to innovate and accelerate the development of education	http://fz.fjsen.com/2022-09/09/content_31128011.htm	http://fz.fjsen.com/2022-09/09/content_31128011.htm
Changtai Industry's "Chain Casting" Record	http://zzpd.fjsen.com/2022-09/08/content_31127204.htm	http://zzpd.fjsen.com/2022-09/08/content_31127204.htm
Energy companies compete to layout the hydrogen energy industry	http://money.fjsen.com/2022-09/07/content_31126315.htm	http://money.fjsen.com/2022-09/07/content_31126315.htm
Mawei: Innovating with determination to promote development, a new chapter in the millennium old port history	http://www.fzccpit.org/2022-09/07/content_31126461.htm	http://www.fzccpit.org/2022-09/07/content_31126461.htm
Mawei: Innovating with determination to promote development, a new chapter in the millennium old port history	http://fz.fjsen.com/2022-09/07/content_31126209.htm	http://fz.fjsen.com/2022-09/07/content_31126209.htm
Xiamen Torch High tech Zone has completed 7 major projects with a total investment of over 18.5 billion yuan	http://fjnews.fjsen.com/2022-09/07/content_31126074.htm	http://fjnews.fjsen.com/2022-09/07/content_31126074.htm
Lin Baojin went to Southeast Auto City for research	http://fz.fjsen.com/2022-09/07/content_31125851.htm	http://fz.fjsen.com/2022-09/07/content_31125851.htm
Quanzhou carbon capture and utilization pilot project expands new road for the first export of captured carbon dioxide	http://qz.fjsen.com/2022-09/06/content_31124986.htm	http://qz.fjsen.com/2022-09/06/content_31124986.htm
The roads in Zhangzhou are becoming increasingly clear and bright	http://zzpd.fjsen.com/2022-09/06/content_31125101.htm	http://zzpd.fjsen.com/2022-09/06/content_31125101.htm
Green Innovation for the Future	http://money.fjsen.com/2022-09/05/content_31123968.htm	http://money.fjsen.com/2022-09/05/content_31123968.htm
Stimulating New Momentum for Green Development	http://money.fjsen.com/2022-09/05/content_31122538.htm	http://money.fjsen.com/2022-09/05/content_31122538.htm
Xiamen Torch High tech Zone launches a service "combination punch" to help enterprises increase trust and stabilize growth	http://fjnews.fjsen.com/2022-09/05/content_31123604.htm	http://fjnews.fjsen.com/2022-09/05/content_31123604.htm
Ensure smooth circulation of supply and stability chain (major inspection in action)	http://www.fjsen.com/2022-09/04/content_31123431.htm	http://www.fjsen.com/2022-09/04/content_31123431.htm
Precision drip irrigation benefits enterprises and promotes industrial development - Industrial Bank Longyan Branch supports high-quality development of manufacturing industry	http://ly.fjsen.com/2022-09/02/content_31123107.htm	http://ly.fjsen.com/2022-09/02/content_31123107.htm
Fuzhou (Changle) International Aviation City optimizes the business environment with a continuous stream of high-end industrial projects	http://cl.fjsen.com/2022-09/02/content_31122482.htm	http://cl.fjsen.com/2022-09/02/content_31122482.htm
Fuzhou High tech Zone Science and Technology Innovation Corridor Builds an Innovative 'Strong Magnetic Field'	http://www.518fuzhou.com/2022-09/02/content_31121631.htm	http://www.518fuzhou.com/2022-09/02/content_31121631.htm
China in the past decade, Fujian | Inspiring new momentum for green development	http://overseas.fjsen.com/2022-09/02/content_31122481.htm	http://overseas.fjsen.com/2022-09/02/content_31122481.htm
Publicity! Fujian individuals and collectives plan to participate in the Chinese Skills Awards and National Technical Experts	http://fjnews.fjsen.com/2022-09/01/content_31121957.htm	http://fjnews.fjsen.com/2022-09/01/content_31121957.htm
Central media attention! High tech Zone's Science and Technology Innovation Corridor Builds an Innovative 'Strong Magnetic Field'	http://fz.fjsen.com/2022-09/01/content_31121658.htm	http://fz.fjsen.com/2022-09/01/content_31121658.htm
Promote the green and innovative development of the automotive industry. The Municipal Political Consultative Conference holds a Chamber of Commerce for the Democratic Revolution sector	http://fz.fjsen.com/2022-09/01/content_31121314.htm	http://fz.fjsen.com/2022-09/01/content_31121314.htm
Report of Industrial Bank in the first half of the year: asset size of nearly 9 trillion yuan, net profit increased by 11.90%	http://ly.fjsen.com/2022-08/31/content_31120831.htm	http://ly.fjsen.com/2022-08/31/content_31120831.htm
Quanzhou: Carrying the banner of "Jinjiang Experience" and making every effort to stabilize the economic situation	http://qz.fjsen.com/2022-08/31/content_31120388.htm	http://qz.fjsen.com/2022-08/31/content_31120388.htm
Publicity! Fujian plans to name these units as national demonstration	http://fjnews.fjsen.com/2022-08/30/content_31119868.htm	http://fjnews.fjsen.com/2022-08/30/content_31119868.htm
The Wind Rises by the East China Sea and the Emerging Land of Tides - A Documentary of the Seventh Anniversary Development of Fuzhou New Area	http://www.fzccpit.org/2022-08/30/content_31119673.htm	http://www.fzccpit.org/2022-08/30/content_31119673.htm
Exploring new forms of power grid, State Grid Putian Power Supply Company builds island level new power system	http://pt.fjsen.com/xw/2022-08/29/content_31119105.htm	http://pt.fjsen.com/xw/2022-08/29/content_31119105.htm
Industrial Bank releases first half transcript	http://zzpd.fjsen.com/2022-08/29/content_31121606.htm	http://zzpd.fjsen.com/2022-08/29/content_31121606.htm
Our province has implemented a green and low-carbon national action plan and issued a green economic development action plan	http://www.518fuzhou.com/2022-08/29/content_31118708.htm	http://www.518fuzhou.com/2022-08/29/content_31118708.htm
How is the circular economy developed by fully utilizing exhaust gas, waste residue, and wastewater?	http://fjnews.fjsen.com/2022-08/29/content_31118553.htm	http://fjnews.fjsen.com/2022-08/29/content_31118553.htm
The New Energy Power Development Summit Forum was held in Fuzhou	http://fz.fjsen.com/2022-08/27/content_31117953.htm	http://fz.fjsen.com/2022-08/27/content_31117953.htm
Report of Industrial Bank in the first half of the year: asset size of nearly 9 trillion yuan, net profit increased by 11.90%	http://sm.fjsen.com/2022-08/26/content_31117816.htm	http://sm.fjsen.com/2022-08/26/content_31117816.htm
Report of Industrial Bank in the first half of the year: asset size of nearly 9 trillion yuan, net profit increased by 11.90%	http://money.fjsen.com/2022-08/26/content_31117791.htm	http://money.fjsen.com/2022-08/26/content_31117791.htm
Xiamen Port accurately solves the problem of exporting cold and dangerous goods	http://overseas.fjsen.com/2022-08/26/content_31117738.htm	http://overseas.fjsen.com/2022-08/26/content_31117738.htm
22 newly recognized headquarters enterprises in Fuzhou	http://www.518fuzhou.com/2022-08/26/content_31117485.htm	http://www.518fuzhou.com/2022-08/26/content_31117485.htm
Inheriting and promoting the 'Jinjiang Experience', Industrial Bank adds momentum to the high-quality development of the private economy	http://pt.fjsen.com/xw/2022-08/25/content_31116833.htm	http://pt.fjsen.com/xw/2022-08/25/content_31116833.htm
Focus Interview: New Infrastructure, New Life, Smart 'Gathering', Urban Intelligence, 'Drawing' the Future	http://www.fjsen.com/2022-08/25/content_31116518.htm	http://www.fjsen.com/2022-08/25/content_31116518.htm
Zhangzhou Steel Industry: Embracing Changes and Starting from the 'New' Perspective	http://fjnews.fjsen.com/2022-08/25/content_31116366.htm	http://fjnews.fjsen.com/2022-08/25/content_31116366.htm
Tai Qing Xiao Jing: 'Small hobbies' unleash great energy	http://taihai.fjsen.com/2022-08/25/content_31116292.htm	http://taihai.fjsen.com/2022-08/25/content_31116292.htm
Jingcheng Town: The production capacity of La Platinum Wan Electronics has steadily increased since its launch and production	http://www.fjnjnews.cn/2022-08/24/content_31116090.htm	http://www.fjnjnews.cn/2022-08/24/content_31116090.htm
Fujian: Tax refunds and reductions help accelerate the recovery of the private economy	http://www.fzccpit.org/2022-08/24/content_31115922.htm	http://www.fzccpit.org/2022-08/24/content_31115922.htm
Tax refunds and reductions help accelerate the recovery of the private economy	http://money.fjsen.com/2022-08/24/content_31115828.htm	http://money.fjsen.com/2022-08/24/content_31115828.htm
Inheriting and promoting the 'Jinjiang Experience', Industrial Bank adds momentum to the high-quality development of the private economy	http://nd.fjsen.com/2022-08/24/content_31115665.htm	http://nd.fjsen.com/2022-08/24/content_31115665.htm
Industrial Bank: Inheriting and Promoting the 'Jinjiang Experience'	http://zzpd.fjsen.com/2022-08/23/content_31121611.htm	http://zzpd.fjsen.com/2022-08/23/content_31121611.htm
Inheriting and promoting the 'Jinjiang Experience', Industrial Bank adds momentum to the high-quality development of the private economy	http://sm.fjsen.com/2022-08/23/content_31115070.htm	http://sm.fjsen.com/2022-08/23/content_31115070.htm
Practical work comes first, and the old area of Sanming has a new appearance	http://sm.fjsen.com/2022-08/22/content_31113656.htm	http://sm.fjsen.com/2022-08/22/content_31113656.htm
Innovation Acceleration | Twisting Various Forces into a Rope	http://www.fjsen.com/2022-08/21/content_31113409.htm	http://www.fjsen.com/2022-08/21/content_31113409.htm
Shanghang County: Developing New Green Industries around the Innovation Chain Industry	http://fjnews.fjsen.com/2022-08/21/content_31113330.htm	http://fjnews.fjsen.com/2022-08/21/content_31113330.htm
Yong'an: Rise of Southeast 'Carbon Valley'	http://fjnews.fjsen.com/2022-08/21/content_31113328.htm	http://fjnews.fjsen.com/2022-08/21/content_31113328.htm
Yin Li meets with Huang Dinan, Chairman of Shenneng Group, and his delegation	http://fjnews.fjsen.com/2022-08/20/content_31113079.htm	http://fjnews.fjsen.com/2022-08/20/content_31113079.htm
The Fujian 2022 (Ningde) Science and Technology Forum of the Jiusan Society was held	http://nd.fjsen.com/2022-08/18/content_31111686.htm	http://nd.fjsen.com/2022-08/18/content_31111686.htm
Inheriting and promoting the "Jinjiang experience" and advancing the innovative development of the work of the National People's Congress	http://qz.fjsen.com/2022-08/18/content_31111528.htm	http://qz.fjsen.com/2022-08/18/content_31111528.htm
The 5th "Chuangxiang Fujian" Competition Energy Conservation and New Energy Special Competition has come to an end	http://fz.fjsen.com/2022-08/18/content_31111210.htm	http://fz.fjsen.com/2022-08/18/content_31111210.htm
28 projects settled in Licheng with a total investment of 37.51 billion yuan	http://qz.fjsen.com/2022-08/17/content_31110455.htm	http://qz.fjsen.com/2022-08/17/content_31110455.htm
Revitalization and development, Longyan in the old area competes for the upper reaches	http://ly.fjsen.com/2022-08/16/content_31110066.htm	http://ly.fjsen.com/2022-08/16/content_31110066.htm
The first International Stainless Steel Industry Innovation and Development Conference was held in Ningde, with 12 industrial projects signed and a total investment of 8.03 billion yuan	http://nd.fjsen.com/2022-08/16/content_31109950.htm	http://nd.fjsen.com/2022-08/16/content_31109950.htm
These new professions reflect new directions for adjusting the employment structure	http://www.fjsen.com/2022-08/16/content_31109774.htm	http://www.fjsen.com/2022-08/16/content_31109774.htm
The charging pile industry chain welcomes a trend	http://news.fjsen.com/2022-08/16/content_31109098.htm	http://news.fjsen.com/2022-08/16/content_31109098.htm
Continuously improving 'Ningde Service' and continuously refreshing 'Ningde Speed'	http://wmf.fjsen.com/2022-08/15/content_31108905.htm	http://wmf.fjsen.com/2022-08/15/content_31108905.htm
Weichiteng: Add 180000 square meters of factory building "Zhangzhou Port Manufacturing" to accelerate and upgrade	http://zzpd.fjsen.com/2022-08/15/content_31108500.htm	http://zzpd.fjsen.com/2022-08/15/content_31108500.htm
Inheriting and promoting the 'Jinjiang Experience' and forging a high-quality development path with Fujian characteristics	http://fjnews.fjsen.com/2022-08/15/content_31108680.htm	http://fjnews.fjsen.com/2022-08/15/content_31108680.htm
Haoen Auto Electric Meeting: 261st IPO approved this year, Guosen Securities has passed 13.5 orders	http://money.fjsen.com/2022-08/15/content_31108560.htm	http://money.fjsen.com/2022-08/15/content_31108560.htm
Xinan Technology Meets: 262nd IPO Passed This Year, CITIC Securities Passes 32.5 Orders	http://money.fjsen.com/2022-08/15/content_31108562.htm	http://money.fjsen.com/2022-08/15/content_31108562.htm
Putian: The Butterfly Transformation of Mother River City	http://fjnews.fjsen.com/2022-08/15/content_31108126.htm	http://fjnews.fjsen.com/2022-08/15/content_31108126.htm
State Grid Xiamen Power Supply Company continues to optimize the business environment to empower the development of the special zone	http://xm.fjsen.com/2022-08/12/content_31107104.htm	http://xm.fjsen.com/2022-08/12/content_31107104.htm
The first unit of Yongtai Pumped Storage Power Station has been officially put into operation for power generation	http://fz.fjsen.com/2022-08/12/content_31106935.htm	http://fz.fjsen.com/2022-08/12/content_31106935.htm
Lithium power new town rises in mudflat	http://nd.fjsen.com/2022-08/12/content_31114761.htm	http://nd.fjsen.com/2022-08/12/content_31114761.htm
Technology dancing on the 'chain'	http://nd.fjsen.com/2022-08/12/content_31114759.htm	http://nd.fjsen.com/2022-08/12/content_31114759.htm
The first unit of Yongtai Pumped Storage Power Station of Fujian Investment Group has been put into operation for power generation	http://fjnews.fjsen.com/2022-08/12/content_31106669.htm	http://fjnews.fjsen.com/2022-08/12/content_31106669.htm
Industry driven and leapfrog development in eastern Fujian	http://fjnews.fjsen.com/2022-08/12/content_31106671.htm	http://fjnews.fjsen.com/2022-08/12/content_31106671.htm
Ningde: Strong Service, Rapid Development	http://fjnews.fjsen.com/2022-08/12/content_31106661.htm	http://fjnews.fjsen.com/2022-08/12/content_31106661.htm
The final of the Longyan division of the 5th "Chuangxiang Fujian" competition has come to a successful conclusion	http://ly.fjsen.com/2022-08/11/content_31109873.htm	http://ly.fjsen.com/2022-08/11/content_31109873.htm
Innovation driven, love to fight and dare to win, Quanzhou's intelligent manufacturing power is strong	http://qz.fjsen.com/2022-08/11/content_31105981.htm	http://qz.fjsen.com/2022-08/11/content_31105981.htm
Love to fight and dare to win, Quanzhou's intelligent manufacturing power is strong	http://wmf.fjsen.com/2022-08/11/content_31105873.htm	http://wmf.fjsen.com/2022-08/11/content_31105873.htm
[Min Shan Min Shui Wu Hua Xin · Extraordinary Ten Years] Love to fight and dare to win, Quanzhou's intelligent manufacturing power is strong	http://fjnews.fjsen.com/2022-08/11/content_31105729.htm	http://fjnews.fjsen.com/2022-08/11/content_31105729.htm
Shanghang: Striving to take the lead in demonstrating and creating a county-level model for the revitalization and development of old areas and Soviet areas	http://ly.fjsen.com/2022-08/10/content_31105649.htm	http://ly.fjsen.com/2022-08/10/content_31105649.htm
Cross island development, surging Xiamen showcases grand plans	http://xm.fjsen.com/2022-08/10/content_31108876.htm	http://xm.fjsen.com/2022-08/10/content_31108876.htm
Fujian Rongneng Group: Party building driven, promoting green development of industries	http://fjnews.fjsen.com/2022-08/10/content_31105576.htm	http://fjnews.fjsen.com/2022-08/10/content_31105576.htm
The Ministry of Science and Technology and the Fujian Provincial Government held a 2022 ministerial and provincial work conference	http://fjnews.fjsen.com/2022-08/09/content_31104713.htm	http://fjnews.fjsen.com/2022-08/09/content_31104713.htm
Mawei: Focus on Building a Modern International City Innovation Leading Zone	http://fz.fjsen.com/2022-08/09/content_31104649.htm	http://fz.fjsen.com/2022-08/09/content_31104649.htm
Fuzhou Mawei: Building a Modern International City Innovation Leading Zone	http://fz.fjsen.com/2022-08/09/content_31104562.htm	http://fz.fjsen.com/2022-08/09/content_31104562.htm
Luojiang Intelligent Manufacturing Ignites a New Engine for High Quality Development	http://qz.fjsen.com/2022-08/09/content_31104350.htm	http://qz.fjsen.com/2022-08/09/content_31104350.htm
Longyan: 11 indicators with growth rates ranking among the top three in the province	http://ly.fjsen.com/2022-08/09/content_31107210.htm	http://ly.fjsen.com/2022-08/09/content_31107210.htm
Ningde: Strong industrial support and stronger development momentum	http://nd.fjsen.com/2022-08/09/content_31114691.htm	http://nd.fjsen.com/2022-08/09/content_31114691.htm
Cross Island Development, Chaochong Xiamen Showcases Ambition - Fujian Daily Digital Report	http://money.fjsen.com/2022-08/09/content_31104067.htm	http://money.fjsen.com/2022-08/09/content_31104067.htm
[Fujian Mountains, Fujian Waters, and Things: A New Era of Extraordinary Achievements] Empowering Xiamen to Take Off Across Islands	http://fjnews.fjsen.com/2022-08/09/content_31103901.htm	http://fjnews.fjsen.com/2022-08/09/content_31103901.htm
Increasing the proportion of applications, improving charging and swapping facilities... Policies support the rapid development of new energy vehicles	http://news.fjsen.com/2022-08/09/content_31103892.htm	http://news.fjsen.com/2022-08/09/content_31103892.htm
Changtai New Yongfa: Focusing on new energy, galloping on the "fast lane"	http://zzpd.fjsen.com/2022-08/08/content_31103328.htm	http://zzpd.fjsen.com/2022-08/08/content_31103328.htm
Since 2021, Fujian People's Insurance Company has provided environmental pollution liability insurance coverage of 3.2 billion yuan to 567 enterprises	http://fjnews.fjsen.com/2022-08/08/content_31103625.htm	http://fjnews.fjsen.com/2022-08/08/content_31103625.htm
Fujian: Banking and insurance industries support the development of Fujian's "four major economies"	http://fjnews.fjsen.com/2022-08/08/content_31103524.htm	http://fjnews.fjsen.com/2022-08/08/content_31103524.htm
Longyan: 11 indicators with growth rates ranking among the top three in the province - Fujian Daily Digital Report	http://money.fjsen.com/2022-08/08/content_31103354.htm	http://money.fjsen.com/2022-08/08/content_31103354.htm
Academicians and experts provide support for the development of the new materials industry cluster in our province - Fujian Daily Digital Report	http://money.fjsen.com/2022-08/08/content_31103348.htm	http://money.fjsen.com/2022-08/08/content_31103348.htm
Ningxia: Jiangnan on the Great Wall Shows New Beauty and Creates a Beautiful New Life	http://www.fjsen.com/2022-08/08/content_31103336.htm	http://www.fjsen.com/2022-08/08/content_31103336.htm
Academicians and experts provide support for the development of the new materials industry cluster in Fujian Province	http://fjnews.fjsen.com/2022-08/08/content_31102826.htm	http://fjnews.fjsen.com/2022-08/08/content_31102826.htm
Is the trend of panoramic sunroof for new energy vehicles trendy and fashionable in the scorching summer or seeking punishment?	http://fjnews.fjsen.com/2022-08/05/content_31102263.htm	http://fjnews.fjsen.com/2022-08/05/content_31102263.htm
Quanzhou: High tech industries soar against the wind	http://overseas.fjsen.com/2022-08/05/content_31101995.htm	http://overseas.fjsen.com/2022-08/05/content_31101995.htm
Innovation driven continuous' leading '- frontline observation of industrial development in Ningde City	http://nd.fjsen.com/2022-08/04/content_31101079.htm	http://nd.fjsen.com/2022-08/04/content_31101079.htm
Fuzhou Liuchuang Park: Building an Entrepreneurial Stage and Expanding Global 'Circle of Friends'	http://www.fzccpit.org/2022-08/04/content_31100949.htm	http://www.fzccpit.org/2022-08/04/content_31100949.htm
Fuzhou plans to recognize 22 headquarters enterprises	http://fz.fjsen.com/2022-08/04/content_31100593.htm	http://fz.fjsen.com/2022-08/04/content_31100593.htm
Fujian Provincial Institute of Metrology has "strategies" and "values" to combat high temperatures	http://www.fjsen.com/zhuanti/2022-08/03/content_31100240.htm	http://www.fjsen.com/zhuanti/2022-08/03/content_31100240.htm
RCEP takes effect in the past six months	http://money.fjsen.com/2022-08/03/content_31099896.htm	http://money.fjsen.com/2022-08/03/content_31099896.htm
Gathering the powerful force to forge ahead on a new journey and contribute to the new era	http://wmf.fjsen.com/2022-08/02/content_31098761.htm	http://wmf.fjsen.com/2022-08/02/content_31098761.htm
Fujian will build a Beidou basic product testing laboratory	http://fz.fjsen.com/2022-08/02/content_31098581.htm	http://fz.fjsen.com/2022-08/02/content_31098581.htm
General Secretary Xi Jinping's important speech at the special seminar for provincial and ministerial level leading cadres has sparked a warm response among cadres and employees of provincial managed enterprises and financial enterprises	http://fjnews.fjsen.com/2022-08/02/content_31098561.htm	http://fjnews.fjsen.com/2022-08/02/content_31098561.htm
Key projects in Fuzhou achieve 'double over half'	http://fz.fjsen.com/2022-08/01/content_31097796.htm	http://fz.fjsen.com/2022-08/01/content_31097796.htm
Our city's key projects have achieved a "double over half" investment of 292.06 billion yuan, accounting for 67.8% of the annual planned investment	http://www.518fuzhou.com/2022-08/01/content_31097633.htm	http://www.518fuzhou.com/2022-08/01/content_31097633.htm
The kickoff meeting for the joint pilot work of cross-strait photovoltaic industry (solar photovoltaic) standards was held in Fuzhou	http://www.fjsen.com/zhuanti/2022-07/29/content_31096390.htm	http://www.fjsen.com/zhuanti/2022-07/29/content_31096390.htm
62 projects competed in the final of the 5th "Chuangxiang Fujian" competition held in Fuzhou	http://fjnews.fjsen.com/2022-07/29/content_31096323.htm	http://fjnews.fjsen.com/2022-07/29/content_31096323.htm
Fuzhou Changle in the past decade: digital economy empowers Binhai New City for greater well-being	http://fz.fjsen.com/2022-07/29/content_31096021.htm	http://fz.fjsen.com/2022-07/29/content_31096021.htm
Chen Xuedong, an academician of the CAE Member, and his delegation went to Gulei to carry out special research	http://zzpd.fjsen.com/2022-07/29/content_31096010.htm	http://zzpd.fjsen.com/2022-07/29/content_31096010.htm
Changle: Toughened industrial system, "Five Ports" gather together to strengthen gateway	http://fz.fjsen.com/2022-07/29/content_31095901.htm	http://fz.fjsen.com/2022-07/29/content_31095901.htm
Huawei Cloud releases' Empowering Cloud 'in Fujian	http://fjnews.fjsen.com/2022-07/29/content_31095911.htm	http://fjnews.fjsen.com/2022-07/29/content_31095911.htm
Quanzhou Xinggu Nan'an New Energy Intelligent Manufacturing Industrial Park starts construction	http://qz.fjsen.com/2022-07/28/content_31095857.htm	http://qz.fjsen.com/2022-07/28/content_31095857.htm
Fujian Xiamen Quality Inspection Institute's forward-looking layout creates a "smart+" innovative service platform for inspection and testing	http://www.fjsen.com/zhuanti/2022-07/28/content_31095654.htm	http://www.fjsen.com/zhuanti/2022-07/28/content_31095654.htm
Hualong One: Building a Great Nation's Heavy Weapon and Creating a National Business Card	http://www.fjsen.com/2022-07/28/content_31095601.htm	http://www.fjsen.com/2022-07/28/content_31095601.htm
The Changle District held a special themed press conference on the theme of "Remembering Instructions, Gratitude, and Striving Forward"	http://cl.fjsen.com/2022-07/28/content_31095374.htm	http://cl.fjsen.com/2022-07/28/content_31095374.htm
The smooth development of county-level logistics is full of vitality (frontline research)	http://www.fjsen.com/2022-07/28/content_31094995.htm	http://www.fjsen.com/2022-07/28/content_31094995.htm
Zhangzhou: Make every effort to attract investment and seek better and faster development	http://zzpd.fjsen.com/2022-07/28/content_31094970.htm	http://zzpd.fjsen.com/2022-07/28/content_31094970.htm
Huawei Cloud launches' Empowering Cloud 'in Fujian, providing services to over 5000 enterprises in Fujian	http://fjnews.fjsen.com/2022-07/26/content_31093932.htm	http://fjnews.fjsen.com/2022-07/26/content_31093932.htm
How to take the road of industrial innovation and upgrading on the People's Daily client? This summit will give you the answer	http://fz.fjsen.com/2022-07/26/content_31093555.htm	http://fz.fjsen.com/2022-07/26/content_31093555.htm
Don't miss out on technology shows such as the Digital China Construction Achievement Exhibition and the Data Expo on the last day	http://fz.fjsen.com/2022-07/26/content_31093426.htm	http://fz.fjsen.com/2022-07/26/content_31093426.htm
Promote the achievement of the "dual carbon" goal and showcase the Beidou new energy vehicle management system at the Digital China Construction Summit	http://fjnews.fjsen.com/2022-07/26/content_31093404.htm	http://fjnews.fjsen.com/2022-07/26/content_31093404.htm
Promote the high-quality development of ecological fisheries in Fujian	http://fjnews.fjsen.com/2022-07/26/content_31093020.htm	http://fjnews.fjsen.com/2022-07/26/content_31093020.htm
The final of the Energy Big Data sub track of the 2022 Digital China Innovation Competition will be held	http://fjnews.fjsen.com/2022-07/25/content_31092728.htm	http://fjnews.fjsen.com/2022-07/25/content_31092728.htm
Huaneng Fujian Company deepens strategic cooperation with Huawei Digital Energy to jointly build a low-carbon intelligent county	http://fjnews.fjsen.com/2022-07/25/content_31092501.htm	http://fjnews.fjsen.com/2022-07/25/content_31092501.htm
Finance provides strong support for the healthy development of the real economy (Financial Eye · Financial Efforts to Stabilize the Economy ②)	http://www.fjsen.com/2022-07/25/content_31092449.htm	http://www.fjsen.com/2022-07/25/content_31092449.htm
Deepen the cooperation between mountains and seas, comprehensively promote high-quality development	http://nd.fjsen.com/2022-07/25/content_31092156.htm	http://nd.fjsen.com/2022-07/25/content_31092156.htm
Ningde Wisdom in the Digital Fujian Pavilion	http://nd.fjsen.com/2022-07/25/content_31092146.htm	http://nd.fjsen.com/2022-07/25/content_31092146.htm
Great strides have been made in the construction of application-oriented universities that cultivate virtue and talent	http://fjnews.fjsen.com/2022-07/25/content_31091965.htm	http://fjnews.fjsen.com/2022-07/25/content_31091965.htm
IoT sub forum held	http://fjnews.fjsen.com/2022-07/25/content_31091947.htm	http://fjnews.fjsen.com/2022-07/25/content_31091947.htm
Xinhua News Agency+丨 Adding Wings to the Digitization of Thousands of Industries - Experience the New Trend at the 5th Digital China Construction Summit	http://news.fjsen.com/2022-07/25/content_31091918.htm	http://news.fjsen.com/2022-07/25/content_31091918.htm
9 projects in Xiamen participate in the centralized signing of major digital economy projects in the province	http://xm.fjsen.com/2022-07/25/content_31091902.htm	http://xm.fjsen.com/2022-07/25/content_31091902.htm
Huawei (Fuzhou) IoT Cloud Computing Innovation Center Showcases Multiple HarmonyOS Adaptation Products at the Digital Summit	http://fjnews.fjsen.com/2022-07/24/content_31091801.htm	http://fjnews.fjsen.com/2022-07/24/content_31091801.htm
Xi Jinping's Love of Mountains and Seas	http://www.fjsen.com/2022-07/24/content_31091705.htm	http://www.fjsen.com/2022-07/24/content_31091705.htm
City leaders conduct research in Yong'an City	http://sm.fjsen.com/2022-07/24/content_31091644.htm	http://sm.fjsen.com/2022-07/24/content_31091644.htm
Forge ahead on a new journey, make achievements in a new era, and achieve extraordinary results in a decade. Fujian: Seize opportunities, seek development, and strive to write a new chapter	http://news.fjsen.com/2022-07/23/content_31091459.htm	http://news.fjsen.com/2022-07/23/content_31091459.htm
State Grid Fujian Electric Power: Digitalization Promotes Energy Transformation	http://fjnews.fjsen.com/2022-07/22/content_31091087.htm	http://fjnews.fjsen.com/2022-07/22/content_31091087.htm
The Ningde Municipal Party Committee and Government carry out the second quarter work inspection activity	http://nd.fjsen.com/2022-07/22/content_31090753.htm	http://nd.fjsen.com/2022-07/22/content_31090753.htm
The 8th Longyan Science and Technology Innovation and Entrepreneurship Competition has successfully concluded	http://ly.fjsen.com/2022-07/22/content_31097875.htm	http://ly.fjsen.com/2022-07/22/content_31097875.htm
Weng Xiaxiang: Dedicate youthful strength to environmental protection technology	http://fjnews.fjsen.com/2022-07/22/content_31090377.htm	http://fjnews.fjsen.com/2022-07/22/content_31090377.htm
A symposium was held to connect with Dr. (Master's) from Fuzhou in the prime of life	http://fz.fjsen.com/2022-07/22/content_31090269.htm	http://fz.fjsen.com/2022-07/22/content_31090269.htm
Provincial government convenes executive meeting	http://fjnews.fjsen.com/2022-07/21/content_31089355.htm	http://fjnews.fjsen.com/2022-07/21/content_31089355.htm
Putian: Green driven growth of industries	http://fjnews.fjsen.com/2022-07/20/content_31088540.htm	http://fjnews.fjsen.com/2022-07/20/content_31088540.htm
The activity schedule has arrived! The 'Minjiang Night Talk' is about to begin!	http://fz.fjsen.com/2022-07/20/content_31088420.htm	http://fz.fjsen.com/2022-07/20/content_31088420.htm
The 2nd China International Data Expo has entered and set up seven exhibition areas, gathering well-known top enterprises in the industry	http://fjnews.fjsen.com/2022-07/19/content_31088356.htm	http://fjnews.fjsen.com/2022-07/19/content_31088356.htm
I have acres of farmland in Ningde	http://nd.fjsen.com/2022-07/19/content_31087926.htm	http://nd.fjsen.com/2022-07/19/content_31087926.htm
Changle Enterprise is a leading player in the global caprolactam industry	http://fjnews.fjsen.com/2022-07/19/content_31087444.htm	http://fjnews.fjsen.com/2022-07/19/content_31087444.htm
Ningde: Guided by reform and innovation, turn abandoned farmland into "hopeful farmland"	http://fjnews.fjsen.com/2022-07/19/content_31087434.htm	http://fjnews.fjsen.com/2022-07/19/content_31087434.htm
The 'Golden Doll' has confidence in promoting rural revitalization	http://nd.fjsen.com/2022-07/18/content_31087931.htm	http://nd.fjsen.com/2022-07/18/content_31087931.htm
The 2022 Fujian trip of central experts from the 93 Society was held in Longyan City	http://ly.fjsen.com/2022-07/18/content_31097134.htm	http://ly.fjsen.com/2022-07/18/content_31097134.htm
Fuding: Accurately creating a "highland" of services with high quality to achieve "half a year red"	http://nd.fjsen.com/2022-07/17/content_31086488.htm	http://nd.fjsen.com/2022-07/17/content_31086488.htm
Ningde: 'Golden Doll' has confidence in promoting rural revitalization	http://fjnews.fjsen.com/2022-07/17/content_31086231.htm	http://fjnews.fjsen.com/2022-07/17/content_31086231.htm
The 2022 Cross Strait Energy and Power Integration Development Forum was held in Xiamen, where experts and scholars from both sides of the Taiwan Strait worked together to discuss the construction of a new power system	http://fjnews.fjsen.com/2022-07/16/content_31086004.htm	http://fjnews.fjsen.com/2022-07/16/content_31086004.htm
congratulate! This female professor from Fujian has won the "China Young Female Scientist Award"	http://fjnews.fjsen.com/2022-07/16/content_31085995.htm	http://fjnews.fjsen.com/2022-07/16/content_31085995.htm
Ningde City vigorously develops vocational education to serve the local economy	http://nd.fjsen.com/2022-07/15/content_31085393.htm	http://nd.fjsen.com/2022-07/15/content_31085393.htm
Three cross-border acquisitions in four years, Hengshen firmly establishes itself as the industry leader	http://fz.fjsen.com/2022-07/15/content_31084992.htm	http://fz.fjsen.com/2022-07/15/content_31084992.htm
Strengthening the linkage between East and West, Industrial Bank's syndicated merger and acquisition loans help Zijin Mining layout the new energy track	http://ly.fjsen.com/2022-07/14/content_31088163.htm	http://ly.fjsen.com/2022-07/14/content_31088163.htm
Ningde Power Supply Company: Special Training Camp to Incubate Digital Talents	http://nd.fjsen.com/2022-07/14/content_31084498.htm	http://nd.fjsen.com/2022-07/14/content_31084498.htm
Fujian Province adds 970 technology small giant enterprises	http://overseas.fjsen.com/2022-07/14/content_31084375.htm	http://overseas.fjsen.com/2022-07/14/content_31084375.htm
The revenue of small tech giants in the province increased by 32% compared to the previous year, with a net profit growth of 51.5%	http://money.fjsen.com/2022-07/14/content_31084257.htm	http://money.fjsen.com/2022-07/14/content_31084257.htm
Ningde: The development highlights of the four leading industries are diverse	http://nd.fjsen.com/2022-07/14/content_31084230.htm	http://nd.fjsen.com/2022-07/14/content_31084230.htm
The 9th batch of cadres and talents from Fujian Province to assist Tibet in promoting development and construction in Changdu	http://fjnews.fjsen.com/2022-07/14/content_31083908.htm	http://fjnews.fjsen.com/2022-07/14/content_31083908.htm
Multiple departments in our province jointly held the "Hundred Day Sprint · Jobs Waiting for You" campus job fair	http://www.fjsen.com/zhuanti/2022-07/13/content_31083789.htm	http://www.fjsen.com/zhuanti/2022-07/13/content_31083789.htm
Xiamen Maisef Airtightness Testing Instrument Debuts at the 2022 Xiamen Industrial Expo	http://pt.fjsen.com/xw/2022-07/13/content_31083651.htm	http://pt.fjsen.com/xw/2022-07/13/content_31083651.htm
Fuzhou's series of measures to promote the relief and recovery of industrial enterprises include strengthening financing support for small and medium-sized enterprises, and providing a maximum subsidy of 2 million yuan for digital transformation and upgrading	http://www.fzccpit.org/2022-07/12/content_31082494.htm	http://www.fzccpit.org/2022-07/12/content_31082494.htm
Xijiekou accelerates the construction of a billion dollar commercial district to help Gulou become the core urban area of an international consumption center city	http://www.fzccpit.org/2022-07/12/content_31082488.htm	http://www.fzccpit.org/2022-07/12/content_31082488.htm
Dongqiao held the first "Internet plus lithium new energy industry" innovation and entrepreneurship competition	http://nd.fjsen.com/2022-07/12/content_31082318.htm	http://nd.fjsen.com/2022-07/12/content_31082318.htm
Sanming: Focus on providing excellent services for emerging industries to thrive	http://sm.fjsen.com/2022-07/12/content_31082256.htm	http://sm.fjsen.com/2022-07/12/content_31082256.htm
Fuzhou series of measures to promote relief and recovery of industrial enterprises	http://fz.fjsen.com/2022-07/12/content_31082177.htm	http://fz.fjsen.com/2022-07/12/content_31082177.htm
The 2022 Xiamen Industrial Expo opened yesterday with five exhibitions linked to attract numerous merchants	http://fjnews.fjsen.com/2022-07/11/content_31081245.htm	http://fjnews.fjsen.com/2022-07/11/content_31081245.htm
57 leading enterprises in the industrial chain in Fuzhou achieved a production value of nearly 160 billion yuan in the first five months	http://fjnews.fjsen.com/2022-07/10/content_31081056.htm	http://fjnews.fjsen.com/2022-07/10/content_31081056.htm
The tide of reform surges across the Lujiang River, setting sail and breaking through the waves to write a new chapter	http://fjnews.fjsen.com/2022-07/09/content_31080782.htm	http://fjnews.fjsen.com/2022-07/09/content_31080782.htm
7-8 National Insurance Public Awareness Day | "Responsibility, Wisdom, Temperature" - Pacific Property and Casualty Insurance Fujian Branch provides "fancy" services to safeguard the stable happiness of the people	http://money.fjsen.com/2022-07/08/content_31080710.htm	http://money.fjsen.com/2022-07/08/content_31080710.htm
The vitality of the "Three Innovations" bursts forth, and Rongcheng is making great strides forward. Fuzhou is cultivating a fertile ground for innovation and entrepreneurship, creating a strong engine for high-quality development	http://www.fzccpit.org/2022-07/08/content_31080484.htm	http://www.fzccpit.org/2022-07/08/content_31080484.htm
Ningde City is making every effort to prepare for the 5th Digital Summit	http://nd.fjsen.com/2022-07/08/content_31080357.htm	http://nd.fjsen.com/2022-07/08/content_31080357.htm
Quanzhou: Love to Fight, Dare to Win, Perseverance to Advance in Turbulent Waters, Brave to Stabilize the Market	http://qz.fjsen.com/2022-07/08/content_31080141.htm	http://qz.fjsen.com/2022-07/08/content_31080141.htm
Xiamen Industrial and Commercial Fair opens	http://overseas.fjsen.com/2022-07/08/content_31080049.htm	http://overseas.fjsen.com/2022-07/08/content_31080049.htm
More than 1500 industrial boutique brands converge, and the 2022 Xiamen Industrial Fair opened yesterday	http://fjnews.fjsen.com/2022-07/08/content_31079936.htm	http://fjnews.fjsen.com/2022-07/08/content_31079936.htm
The vitality of the "Three Innovations" bursts forth, and Rongcheng is advancing vigorously	http://fz.fjsen.com/2022-07/08/content_31079871.htm	http://fz.fjsen.com/2022-07/08/content_31079871.htm
The effect of Fujian's tax refund and reduction policy is evident	http://fjnews.fjsen.com/2022-07/08/content_31079861.htm	http://fjnews.fjsen.com/2022-07/08/content_31079861.htm
Ningde: Protecting Green Mountains and Waters, Polishing Ecological Background	http://nd.fjsen.com/2022-07/07/content_31079320.htm	http://nd.fjsen.com/2022-07/07/content_31079320.htm
Haixi Branch: Shouldering the mission of the new era and focusing on "specialization, refinement, uniqueness, and novelty"	http://www.fjsen.com/zhuanti/2022-07/07/content_31079208.htm	http://www.fjsen.com/zhuanti/2022-07/07/content_31079208.htm
More than 1500 industrial brands will debut at the Xiamen International Fair today	http://xm.fjsen.com/2022-07/07/content_31079080.htm	http://xm.fjsen.com/2022-07/07/content_31079080.htm
Remembering the Entrustment and Carrying on the Mission: A New Chapter of Reform in Fujian Province - A Summary of the Achievements of Fujian's Comprehensive Deepening of Reform since the 18th National Congress of the Communist Party of China	http://fjnews.fjsen.com/2022-07/07/content_31078891.htm	http://fjnews.fjsen.com/2022-07/07/content_31078891.htm
Quanzhou: City owned state-owned enterprises achieve 'zero breakthrough' in listing	http://www.fjsen.com/content/2022-07/06/content_31078301.htm	http://www.fjsen.com/content/2022-07/06/content_31078301.htm
30th Anniversary of the Publication of "Getting rid of Poverty" | Ningde Practice of "Weak Birds Fly First"	http://fjnews.fjsen.com/2022-07/06/content_31078400.htm	http://fjnews.fjsen.com/2022-07/06/content_31078400.htm
Xingye Securities has achieved significant results in serving the construction of the new Fujian	http://fjnews.fjsen.com/2022-07/06/content_31078145.htm	http://fjnews.fjsen.com/2022-07/06/content_31078145.htm
The first future industrial park in Xiamen Science City was unveiled	http://fjnews.fjsen.com/2022-07/06/content_31078047.htm	http://fjnews.fjsen.com/2022-07/06/content_31078047.htm
Ningde: Long lasting efforts to overcome difficulties, dripping water through stones, opening up new chapters	http://ndwm.fjsen.com/2022-07/06/content_31078041.htm	http://ndwm.fjsen.com/2022-07/06/content_31078041.htm
Fujian accelerates the construction of a modern economic system	http://fjnews.fjsen.com/2022-07/06/content_31077987.htm	http://fjnews.fjsen.com/2022-07/06/content_31077987.htm
People's Daily front page thumbs up: Fujian accelerates the construction of a modern economic system	http://wmf.fjsen.com/2022-07/05/content_31077779.htm	http://wmf.fjsen.com/2022-07/05/content_31077779.htm
Ningde: 'Your peace' is' Ningde peace '	http://wmf.fjsen.com/2022-07/05/content_31077031.htm	http://wmf.fjsen.com/2022-07/05/content_31077031.htm
The 2022 Xiamen Industrial Fair will be held on July 7th, and the "Cloud based Industrial Fair" mini program will be launched	http://xm.fjsen.com/2022-07/05/content_31076873.htm	http://xm.fjsen.com/2022-07/05/content_31076873.htm
Moving from Poverty Alleviation to Common Prosperity: Practice and Inspiration from Ningde	http://fjnews.fjsen.com/2022-07/05/content_31077146.htm	http://fjnews.fjsen.com/2022-07/05/content_31077146.htm
The first domestic green intelligent hybrid tugboat project signed a contract	http://fjnews.fjsen.com/2022-07/05/content_31077068.htm	http://fjnews.fjsen.com/2022-07/05/content_31077068.htm
The Xiamen Industrial and Commercial Fair, which integrates online and offline activities, will open the day after tomorrow	http://xm.fjsen.com/2022-07/05/content_31076952.htm	http://xm.fjsen.com/2022-07/05/content_31076952.htm
Del Technology: Mastering independent core technologies to achieve disruptive technological innovation	http://www.fjsen.com/zhuanti/2022-07/04/content_31077302.htm	http://www.fjsen.com/zhuanti/2022-07/04/content_31077302.htm
Cultivate fertile ground for investment and entrepreneurship, inject economic development momentum. Luoyuan Investment Promotion has started construction and completed, running side by side	http://www.fzccpit.org/2022-07/04/content_31076557.htm	http://www.fzccpit.org/2022-07/04/content_31076557.htm
Cross Strait employees' 'three innovation' competition held	http://taihai.fjsen.com/2022-07/04/content_31076113.htm	http://taihai.fjsen.com/2022-07/04/content_31076113.htm
Xiamen launches' Pillars of Xiamen 'plan, Xiamen Alumni Economic Alliance established	http://xm.fjsen.com/2022-07/04/content_31075963.htm	http://xm.fjsen.com/2022-07/04/content_31075963.htm
Luoyuan Investment Promotion starts construction and completes' running side by side '	http://fz.fjsen.com/2022-07/04/content_31075931.htm	http://fz.fjsen.com/2022-07/04/content_31075931.htm
Remembering the earnest instructions and moving towards the blue dream - the Standing Committee of the People's Congress of Ningde City strengthens the legal guarantee for the protection and development of Sandu'ao	http://nd.fjsen.com/2022-07/01/content_31075367.htm	http://nd.fjsen.com/2022-07/01/content_31075367.htm
Ponytail painting is good for living, suitable for business, and "meticulous painting"	http://fz.fjsen.com/2022-07/01/content_31074533.htm	http://fz.fjsen.com/2022-07/01/content_31074533.htm
Registration for the Energy Conservation and New Energy Special Competition of the 5th "Chuangxiang Fujian" Small and Medium sized Enterprise Innovation and Entrepreneurship Competition has begun	http://money.fjsen.com/2022-06/29/content_31072956.htm	http://money.fjsen.com/2022-06/29/content_31072956.htm
The first domestically connected hybrid tugboat is under construction in Rongkai	http://fz.fjsen.com/2022-06/29/content_31072730.htm	http://fz.fjsen.com/2022-06/29/content_31072730.htm
Industrial Bank Nanping Branch contributes to the green and high-quality development of Nanping, surpassing the contribution of "Xing" power	http://np.fjsen.com/2022-06/29/content_31072579.htm	http://np.fjsen.com/2022-06/29/content_31072579.htm
5G empowers Ningde Times with green extreme manufacturing, making factories more 'smart'	http://fjnews.fjsen.com/2022-06/28/content_31072103.htm	http://fjnews.fjsen.com/2022-06/28/content_31072103.htm
Fujian Agriculture and Forestry University establishes Carbon Neutrality College and Carbon Neutrality Research Institute	http://fjnews.fjsen.com/2022-06/28/content_31071608.htm	http://fjnews.fjsen.com/2022-06/28/content_31071608.htm
He laid tracks on the mountain to allow agricultural products to ride on a roller coaster	http://np.fjsen.com/2022-06/28/content_31071531.htm	http://np.fjsen.com/2022-06/28/content_31071531.htm
The Carbon Neutrality College and Carbon Neutrality Research Institute of Fujian Agriculture and Forestry University were unveiled and established, with the first phase offering two undergraduate majors: New Energy Science and Engineering and Carbon Neutrality Innovation Experimental Class	http://fjnews.fjsen.com/2022-06/27/content_31071497.htm	http://fjnews.fjsen.com/2022-06/27/content_31071497.htm
Pucheng County signed a contract on June 18th with a total investment of 1.02 billion yuan!	http://np.fjsen.com/2022-06/27/content_31071212.htm	http://np.fjsen.com/2022-06/27/content_31071212.htm
Fujian Giant Electric: Subverting Tradition to Boost the Development of New Energy Industry	http://www.fjsen.com/zhuanti/2022-06/27/content_31071303.htm	http://www.fjsen.com/zhuanti/2022-06/27/content_31071303.htm
The first vocational skills competition for forklift drivers of lifting and unloading machinery was held in Ningde City	http://nd.fjsen.com/2022-06/27/content_31071146.htm	http://nd.fjsen.com/2022-06/27/content_31071146.htm
New measures to promote automobile consumption (Rui Finance)	http://www.fjsen.com/2022-06/27/content_31071076.htm	http://www.fjsen.com/2022-06/27/content_31071076.htm
The Provincial Emergency Technology Center assisted in conducting special supervision and inspections in four cities including Fuzhou	http://www.fjsen.com/zhuanti/2022-06/27/content_31072256.htm	http://www.fjsen.com/zhuanti/2022-06/27/content_31072256.htm
Research on the Development Strategy and Implementation Path of Fujian Province's Manufacturing Strong Province in the New Era "has been launched	http://fjnews.fjsen.com/2022-06/27/content_31070617.htm	http://fjnews.fjsen.com/2022-06/27/content_31070617.htm
Building bridges and paving the way for scientific and technological achievements to be implemented and generate "gold". Fuzhou High tech Zone deeply integrates "industry university research gold" to create a source of innovation for the whole province	http://www.518fuzhou.com/2022-06/24/content_31069356.htm	http://www.518fuzhou.com/2022-06/24/content_31069356.htm
Ningde City revises seven measures to promote the development of the lithium battery new energy industry chain	http://nd.fjsen.com/2022-06/24/content_31069312.htm	http://nd.fjsen.com/2022-06/24/content_31069312.htm
Comprehensively assisting in stabilizing the economic situation, playing the song of "developing industry" on the red soil	http://ly.fjsen.com/2022-06/23/content_31068633.htm	http://ly.fjsen.com/2022-06/23/content_31068633.htm
Carefully building a nest, attracting phoenixes, rowing boats, setting sail, and striving to be the first	http://sm.fjsen.com/2022-06/23/content_31068234.htm	http://sm.fjsen.com/2022-06/23/content_31068234.htm
Longyan: Creating a Warm and Happy City	http://fjnews.fjsen.com/2022-06/23/content_31068104.htm	http://fjnews.fjsen.com/2022-06/23/content_31068104.htm
Remembering the Mission and Striving for the People "Series Theme Press Conference Ningde Special Session Answering Journalists' Questions	http://fjnews.fjsen.com/2022-06/22/content_31068641.htm	http://fjnews.fjsen.com/2022-06/22/content_31068641.htm
Observation of the first-line automobile consumer market in Huli District, Xiamen City	http://xm.fjsen.com/2022-06/22/content_31069944.htm	http://xm.fjsen.com/2022-06/22/content_31069944.htm
At the closing ceremony of the 20th China Strait Innovation Project Achievement Trading Fair, a total of 361 projects were signed	http://www.fjsen.com/zhuanti/2022-06/22/content_31067950.htm	http://www.fjsen.com/zhuanti/2022-06/22/content_31067950.htm
Multi gathering observation: Gathering strong forces for the construction of New Fujian	http://www.fjsen.com/zhuanti/2022-06/22/content_31067389.htm	http://www.fjsen.com/zhuanti/2022-06/22/content_31067389.htm
Fujian two car companies join forces to promote pure electric light passenger vehicles	http://fjnews.fjsen.com/2022-06/22/content_31067117.htm	http://fjnews.fjsen.com/2022-06/22/content_31067117.htm
The Propaganda Department of the Communist Party of China Fujian Provincial Committee held a series of themed press conferences on "Remembering the Mission and Striving for the People" and answered questions from reporters	http://fjnews.fjsen.com/2022-06/21/content_31067036.htm	http://fjnews.fjsen.com/2022-06/21/content_31067036.htm
Longyan promotes high-quality development of education, with high school teaching quality ranking among the top three in the province	http://fjnews.fjsen.com/2022-06/21/content_31066801.htm	http://fjnews.fjsen.com/2022-06/21/content_31066801.htm
Longyan: Creating a Joyful Longyan with Inclusive Sharing and Warmth	http://fjnews.fjsen.com/2022-06/21/content_31066742.htm	http://fjnews.fjsen.com/2022-06/21/content_31066742.htm
Reading Local Economy through Numbers: Accumulating Potential under Pressure	http://www.fjsen.com/2022-06/21/content_31066441.htm	http://www.fjsen.com/2022-06/21/content_31066441.htm
Pingshan Jun | Behind the Age of 18: Glorious Years Across Centuries	http://overseas.fjsen.com/2022-06/21/content_31066421.htm	http://overseas.fjsen.com/2022-06/21/content_31066421.htm
5G empowers green 'smart manufacturing'	http://nd.fjsen.com/2022-06/21/content_31066416.htm	http://nd.fjsen.com/2022-06/21/content_31066416.htm
Look! The 'New and Unique' of Fujian State owned Enterprises	http://fjnews.fjsen.com/2022-06/21/content_31066082.htm	http://fjnews.fjsen.com/2022-06/21/content_31066082.htm
Gold Mining Hydrogen Energy Golden Dragon Bus New Energy Strategy New Layout Injects New Momentum into High Quality Development	http://www.fjsen.com/2022-06/20/content_31065982.htm	http://www.fjsen.com/2022-06/20/content_31065982.htm
Appearing at the 'Hai Chuang Hui'! These projects in Taijiang are amazing!	http://fz.fjsen.com/2022-06/20/content_31065852.htm	http://fz.fjsen.com/2022-06/20/content_31065852.htm
Hai Chuang Hui: Gathering innovative elements to promote economic transformation and upgrading	http://fjnews.fjsen.com/2022-06/20/content_31065771.htm	http://fjnews.fjsen.com/2022-06/20/content_31065771.htm
Touching cutting-edge technology, intelligent manufacturing, and a better life. The Hai Chuang Conference presents its annual technology show	http://www.fjsen.com/zhuanti/2022-06/20/content_31065660.htm	http://www.fjsen.com/zhuanti/2022-06/20/content_31065660.htm
The 7th World Fujian Merchants Conference was grandly held in Fuzhou, gathering the strength of Fujian merchants from home and abroad to build a new Fujian	http://money.fjsen.com/2022-06/20/content_31065478.htm	http://money.fjsen.com/2022-06/20/content_31065478.htm
Provincial key technological innovation and industrialization projects, Quanzhou six projects are planned to be selected	http://qz.fjsen.com/2022-06/20/content_31065395.htm	http://qz.fjsen.com/2022-06/20/content_31065395.htm
Joining Hands for the Future, Building a New Era, and Building a New Fujian. The 7th World Fujian Business Conference opened, and Vice Chairman of the National Committee of the Chinese People's Political Consultative Conference, Gao Yunlong, attended and delivered a speech. Zhao Long, Xu Yousheng, and Cui Yuying also attended	http://overseas.fjsen.com/2022-06/20/content_31065236.htm	http://overseas.fjsen.com/2022-06/20/content_31065236.htm
The 7th World Fujian Merchants Conference issued the voice of Ningde from "industry follower" to "industry leader"	http://nd.fjsen.com/2022-06/20/content_31065116.htm	http://nd.fjsen.com/2022-06/20/content_31065116.htm
Nearly 40 intergovernmental cooperation projects have been launched between China and the Philippines, and the two countries are working towards each other to unleash the dividends of cooperation - Chinese Ambassador to the Philippines Huang Xilian was interviewed by 21st Century Business Herald	http://overseas.fjsen.com/2022-06/20/content_31065057.htm	http://overseas.fjsen.com/2022-06/20/content_31065057.htm
The 20th China Strait Innovation Project Achievement Trading Fair opened in Rong	http://www.fjsen.com/zhuanti/2022-06/19/content_31064808.htm	http://www.fjsen.com/zhuanti/2022-06/19/content_31064808.htm
Multiple technological innovation achievements from Ningde City were showcased at the 20th Hai Chuang Conference	http://nd.fjsen.com/2022-06/19/content_31065113.htm	http://nd.fjsen.com/2022-06/19/content_31065113.htm
The 7th World Fujian Merchants Conference opens	http://fjnews.fjsen.com/2022-06/19/content_31064652.htm	http://fjnews.fjsen.com/2022-06/19/content_31064652.htm
The 2022 Fujian Carbon Peak and Carbon Neutrality Summit Forum will be held, and the Carbon Neutrality Society will be established	http://www.fjsen.com/zhuanti/2022-06/19/content_31064646.htm	http://www.fjsen.com/zhuanti/2022-06/19/content_31064646.htm
Xingyun Corporation: Empowering High Quality Development of the New Energy Industry Chain with Innovation	http://www.fjsen.com/zhuanti/2022-06/19/content_31064620.htm	http://www.fjsen.com/zhuanti/2022-06/19/content_31064620.htm
【 Fujian Merchants Discuss Fujian's High Quality Development and Transcendence 】 Zeng Yuqun: If you go out, you will benefit the world. If you return home, you will repay the mulberry trees. This is the indomitable passion of Fujian merchants	http://fjnews.fjsen.com/2022-06/18/content_31064591.htm	http://fjnews.fjsen.com/2022-06/18/content_31064591.htm
The Blue Book of Fujian Merchants: Development Report of Fujian Merchants (2022) was released in Fuzhou	http://overseas.fjsen.com/2022-06/17/content_31064003.htm	http://overseas.fjsen.com/2022-06/17/content_31064003.htm
Intelligent manufacturing adds momentum, innovation wins the future. Our city accelerates the transformation and upgrading of the manufacturing industry	http://www.518fuzhou.com/2022-06/17/content_31063546.htm	http://www.518fuzhou.com/2022-06/17/content_31063546.htm
Xiamen holds the 2022 National Low Carbon Day event	http://xm.fjsen.com/2022-06/16/content_31062874.htm	http://xm.fjsen.com/2022-06/16/content_31062874.htm
The 20th Hai Chuang Fair will set up a "dual carbon" industry innovation exhibition and hold the 2022 Fujian Carbon Peak and Carbon Neutral Development Summit Forum	http://www.fjsen.com/zhuanti/2022-06/16/content_31062711.htm	http://www.fjsen.com/zhuanti/2022-06/16/content_31062711.htm
Industrial Bank: Practical measures to help enterprises overcome difficulties and stabilize the economic fundamentals	http://ly.fjsen.com/2022-06/15/content_31062236.htm	http://ly.fjsen.com/2022-06/15/content_31062236.htm
Green and low-carbon have become a new trend in society	http://news.fjsen.com/2022-06/15/content_31061394.htm	http://news.fjsen.com/2022-06/15/content_31061394.htm
Nanping City's "Sending Jobs and Retaining Talents to Campus" Special Activity Held	http://np.fjsen.com/2022-06/15/content_31061372.htm	http://np.fjsen.com/2022-06/15/content_31061372.htm
Empower the construction of "Electric Fujian" and establish an academician workstation for electric drive technology	http://fjnews.fjsen.com/2022-06/15/content_31061382.htm	http://fjnews.fjsen.com/2022-06/15/content_31061382.htm
Assisting in the construction of New Fujian, the National Energy Group will make its debut at the Ocean Innovation Fair	http://www.fjsen.com/zhuanti/2022-06/13/content_31060042.htm	http://www.fjsen.com/zhuanti/2022-06/13/content_31060042.htm
Cao Cao Travel "recruits 50 retired military drivers from across the province	http://www.fjsen.com/zhuanti/2022-06/13/content_31059799.htm	http://www.fjsen.com/zhuanti/2022-06/13/content_31059799.htm
Fujian: Ignite a new engine and compete for new manufacturing	http://www.fjsen.com/2022-06/11/content_31058453.htm	http://www.fjsen.com/2022-06/11/content_31058453.htm
Longyan Development Zone Tax Bureau: Retaining tax refunds to assist technology enterprises in accumulating strength and empowering themselves	http://www.fjsen.com/content/2022-06/10/content_31058060.htm	http://www.fjsen.com/content/2022-06/10/content_31058060.htm
Zhangzhou: Building a Modern Coastal City "New Engine"	http://fjnews.fjsen.com/2022-06/09/content_31056365.htm	http://fjnews.fjsen.com/2022-06/09/content_31056365.htm
The second council meeting of the first council of Mindu Innovation Laboratory was held	http://fz.fjsen.com/2022-06/09/content_31056327.htm	http://fz.fjsen.com/2022-06/09/content_31056327.htm
Quanzhou releases 69 measures to stabilize growth	http://qz.fjsen.com/2022-06/08/content_31055495.htm	http://qz.fjsen.com/2022-06/08/content_31055495.htm
Ningde Times' innovative team for the development and application of new lithium batteries has been awarded the title of "National Advanced Collective of Professional and Technical Talents"	http://fjnews.fjsen.com/2022-06/08/content_31055174.htm	http://fjnews.fjsen.com/2022-06/08/content_31055174.htm
Longyan: Upgrading the Environmental Protection Equipment Industry	http://fjnews.fjsen.com/2022-06/08/content_31055157.htm	http://fjnews.fjsen.com/2022-06/08/content_31055157.htm
Yin Li: Taking technological innovation as the key engine for high-quality development in Fujian	http://fjnews.fjsen.com/2022-06/08/content_31055163.htm	http://fjnews.fjsen.com/2022-06/08/content_31055163.htm
The 20th Hai Chuang Conference will be held from June 18th to 20th, focusing on the four major economies	http://fjnews.fjsen.com/2022-06/06/content_31054064.htm	http://fjnews.fjsen.com/2022-06/06/content_31054064.htm
At the press conference, these departments mentioned implementing a package of policies to stabilize the economy	http://fjnews.fjsen.com/2022-06/06/content_31053767.htm	http://fjnews.fjsen.com/2022-06/06/content_31053767.htm
Fuding adopts the "four tracking" working mechanism to press the "fast forward button" for project construction	http://nd.fjsen.com/2022-06/06/content_31053656.htm	http://nd.fjsen.com/2022-06/06/content_31053656.htm
Work hard to implement and stick to the bottom line of safety -- The TV feature film "Life is more important than Mount Tai" caused a warm response	http://www.fjsen.com/zhuanti/2022-06/06/content_31053398.htm	http://www.fjsen.com/zhuanti/2022-06/06/content_31053398.htm
Growing Together with Intelligent Equipment Manufacturing Enterprises	http://overseas.fjsen.com/2022-06/06/content_31053284.htm	http://overseas.fjsen.com/2022-06/06/content_31053284.htm
Provide BRICS impetus for international development cooperation	http://overseas.fjsen.com/2022-06/06/content_31053097.htm	http://overseas.fjsen.com/2022-06/06/content_31053097.htm
Proactively taking on responsibilities to help stabilize the economy - Industrial Bank Ningde Branch's service to Ningde's economy profile	http://nd.fjsen.com/2022-06/04/content_31052685.htm	http://nd.fjsen.com/2022-06/04/content_31052685.htm
State Grid Putian Power Supply Company: Strengthen supervision and guarantee to safeguard the "dual carbon" goal	http://pt.fjsen.com/xw/2022-06/02/content_31051706.htm	http://pt.fjsen.com/xw/2022-06/02/content_31051706.htm
Promoting the spirit of science and popularizing scientific knowledge - A side note on the "National Science and Technology Workers' Day" series of activities in Ningde City	http://nd.fjsen.com/2022-06/02/content_31051209.htm	http://nd.fjsen.com/2022-06/02/content_31051209.htm
Investment of 4 billion yuan to build 8 production lines for Haichen Energy Storage Lithium Battery Phase II	http://xm.fjsen.com/2022-06/02/content_31050799.htm	http://xm.fjsen.com/2022-06/02/content_31050799.htm
Press Conference on the Theme of "Remembering the Mission and Striving for the People" (Putian: Remembering the Entrustment to Benefit the People) Answering Journalists' Questions	http://fjnews.fjsen.com/2022-06/01/content_31050780.htm	http://fjnews.fjsen.com/2022-06/01/content_31050780.htm
Two major distributed photovoltaic power generation projects have landed, adding another "force" to the new energy track in Fujian	http://money.fjsen.com/2022-06/01/content_31050763.htm	http://money.fjsen.com/2022-06/01/content_31050763.htm
The first headquarters base project in the Sanjiangkou area of Fuzhou was unveiled	http://overseas.fjsen.com/2022-05/31/content_31048807.htm	http://overseas.fjsen.com/2022-05/31/content_31048807.htm
Announcement on Candidates for Outstanding Builders of Fujian Province's Non Public Economy	http://fjnews.fjsen.com/2022-05/31/content_31048697.htm	http://fjnews.fjsen.com/2022-05/31/content_31048697.htm
Implementation Plan for Fujian Province to Deepen the Battle of Pollution Prevention and Control	http://fjnews.fjsen.com/2022-05/31/content_31048552.htm	http://fjnews.fjsen.com/2022-05/31/content_31048552.htm
Longyan Development Zone Tax Bureau: Retaining tax refunds injects capital vitality into high-tech enterprises	http://www.fjsen.com/content/2022-05/30/content_31048218.htm	http://www.fjsen.com/content/2022-05/30/content_31048218.htm
One County, One Product Loan Action for "Fujian" Life Special Action - "Xingye Green" Loan Action for Shanghai Hangzhou Low Carbon Circular Economy	http://ly.fjsen.com/2022-05/30/content_31047910.htm	http://ly.fjsen.com/2022-05/30/content_31047910.htm
The highest prize is 8 million yuan! Fuzhou's three departments have taken action!	http://fz.fjsen.com/2022-05/30/content_31047416.htm	http://fz.fjsen.com/2022-05/30/content_31047416.htm
Zhangzhou city leaders conduct research on the Three Gorges Zhangpu Liu'ao offshore wind power project	http://zzpd.fjsen.com/2022-05/29/content_31046284.htm	http://zzpd.fjsen.com/2022-05/29/content_31046284.htm
Shaowu builds fluorine new material industry base, iron city. "Fluorine" baby is growing up	http://fjnews.fjsen.com/2022-05/29/content_31046686.htm	http://fjnews.fjsen.com/2022-05/29/content_31046686.htm
Look at it! Fujian's largest data center adds greenery like this	http://cl.fjsen.com/2022-05/27/content_31046215.htm	http://cl.fjsen.com/2022-05/27/content_31046215.htm
Longyan Development Zone Tax Bureau: "Retained tax refund" helps alleviate difficulties and reduce burdens for small and micro enterprises	http://www.fjsen.com/content/2022-05/27/content_31046222.htm	http://www.fjsen.com/content/2022-05/27/content_31046222.htm
The first headquarters base project in the Sanjiangkou area of Fuzhou was unveiled with a total investment of 10.3 billion yuan	http://fz.fjsen.com/2022-05/27/content_31045937.htm	http://fz.fjsen.com/2022-05/27/content_31045937.htm
Industrial Bank Ningde Branch injects' green momentum 'into the development of energy storage industry	http://money.fjsen.com/2022-05/27/content_31045462.htm	http://money.fjsen.com/2022-05/27/content_31045462.htm
Press conference for the 7th World Fujian Business Conference and the 12th Fujian Private Enterprise Industry Project Negotiation Conference, answering questions from reporters	http://fjnews.fjsen.com/2022-05/26/content_31044635.htm	http://fjnews.fjsen.com/2022-05/26/content_31044635.htm
Fuzhou has established 5 labor cooperation bases in Zhaotong	http://overseas.fjsen.com/2022-05/26/content_31044587.htm	http://overseas.fjsen.com/2022-05/26/content_31044587.htm
During his research in Fujian, Han emphasized the need to efficiently coordinate epidemic prevention and control with economic and social development, continuously promote high-quality development, and take new steps forward	http://news.fjsen.com/2022-05/26/content_31044108.htm	http://news.fjsen.com/2022-05/26/content_31044108.htm
Han is conducting research in Fujian	http://ndwm.fjsen.com/2022-05/26/content_31044369.htm	http://ndwm.fjsen.com/2022-05/26/content_31044369.htm
Establishing the 'Ningde Landmark' in the global industrial landscape	http://nd.fjsen.com/2022-05/24/content_31042400.htm	http://nd.fjsen.com/2022-05/24/content_31042400.htm
Strong resilience and driving force enable Fujian's industry to rise against the trend	http://overseas.fjsen.com/2022-05/23/content_31041066.htm	http://overseas.fjsen.com/2022-05/23/content_31041066.htm
Ningde: Creating a New Chapter in Growth Polarography	http://nd.fjsen.com/2022-05/23/content_31040892.htm	http://nd.fjsen.com/2022-05/23/content_31040892.htm
Comrade Xi Jinping has always demanded that the public security organs be the 'protectors' of the people. "- Xi Jinping in Fujian (21)	http://fjnews.fjsen.com/2022-05/21/content_31040029.htm	http://fjnews.fjsen.com/2022-05/21/content_31040029.htm
State Grid Ningde Power Supply Company signed a development strategic cooperation agreement with the People's Government of Fu'an City	http://nd.fjsen.com/2022-05/20/content_31039982.htm	http://nd.fjsen.com/2022-05/20/content_31039982.htm
Summary of the 30th Anniversary Series of the Implementation of the "3820" Strategic Project in Fuzhou City, Part 2: Joint Soaring of Mountains and Seas	http://www.518fuzhou.com/2022-05/20/content_31039374.htm	http://www.518fuzhou.com/2022-05/20/content_31039374.htm
Longyan: Empowering high-quality development through the integration of industry and education	http://ly.fjsen.com/2022-05/20/content_31042978.htm	http://ly.fjsen.com/2022-05/20/content_31042978.htm
Mingxi: Gathering strength to activate the development advantages of the "three new" industries	http://overseas.fjsen.com/2022-05/20/content_31039136.htm	http://overseas.fjsen.com/2022-05/20/content_31039136.htm
Green Power "Hydrogen" Ignites the Future - The Australian Fujian Chamber of Commerce held the eighth stop of the "Entering Enterprises" event	http://overseas.fjsen.com/2022-05/18/content_31037802.htm	http://overseas.fjsen.com/2022-05/18/content_31037802.htm
Make green travel a habit	http://wmf.fjsen.com/2022-05/18/content_31037629.htm	http://wmf.fjsen.com/2022-05/18/content_31037629.htm
'Ningju' Eight Talents Compose 'Ningde Chapter'	http://nd.fjsen.com/2022-05/17/content_31036361.htm	http://nd.fjsen.com/2022-05/17/content_31036361.htm
Fuzhou aims to empower small and medium-sized enterprises with "specialization, refinement, uniqueness, and innovation" to accelerate their growth	http://fz.fjsen.com/2022-05/17/content_31036211.htm	http://fz.fjsen.com/2022-05/17/content_31036211.htm
Good laws and good governance safeguard the green waters and mountains of Bamin	http://fjnews.fjsen.com/2022-05/16/content_31034760.htm	http://fjnews.fjsen.com/2022-05/16/content_31034760.htm
Enjoy "Free Application" Pingtan Enterprise Enjoys Being a "Hands Off Shopkeeper"	http://ptxw.fjsen.com/2022-05/15/content_31035132.htm	http://ptxw.fjsen.com/2022-05/15/content_31035132.htm
Make every effort to stabilize market entities	http://www.fjsen.com/2022-05/15/content_31034541.htm	http://www.fjsen.com/2022-05/15/content_31034541.htm
Changtai District: Exploring a new model of socialized support for the military through joint construction between military and enterprises	http://www.fjsen.com/zhuanti/2022-05/13/content_31033799.htm	http://www.fjsen.com/zhuanti/2022-05/13/content_31033799.htm
Adhering to the principle of stability as the top priority, seeking progress while maintaining stability, taking proactive measures, overcoming difficulties, and achieving a stable start to the overall operation of China's economy - an important year to look at the beginning of the year	http://www.fjsen.com/2022-05/13/content_31033635.htm	http://www.fjsen.com/2022-05/13/content_31033635.htm
Adhering to the comprehensive leadership of the Party is the only way to uphold and develop socialism with Chinese characteristics	http://jx.fjsen.com/2022-05/11/content_31031800.htm	http://jx.fjsen.com/2022-05/11/content_31031800.htm
Strive to achieve the maximum prevention and control effect with the minimum cost	http://jx.fjsen.com/2022-05/11/content_31031761.htm	http://jx.fjsen.com/2022-05/11/content_31031761.htm
Liancheng: Striving to Build a High Quality Modern Industrial Agglomeration Zone	http://overseas.fjsen.com/2022-05/11/content_31031286.htm	http://overseas.fjsen.com/2022-05/11/content_31031286.htm
Fuchuan Yifan: Overcoming Difficulties and Practicing Worker Pioneer	http://zzpd.fjsen.com/2022-05/10/content_31030120.htm	http://zzpd.fjsen.com/2022-05/10/content_31030120.htm
Zijin Mining plans to acquire control of Longjing Environmental Protection through agreement transfer	http://fjnews.fjsen.com/2022-05/10/content_31029864.htm	http://fjnews.fjsen.com/2022-05/10/content_31029864.htm
Longyan High tech Zone (Economic Development Zone): Refining Services to Achieve Enterprise Income and Cost Reduction	http://fjnews.fjsen.com/2022-05/10/content_31029801.htm	http://fjnews.fjsen.com/2022-05/10/content_31029801.htm
Luo Yuan: Riding on the wind is just the right time	http://fz.fjsen.com/2022-05/10/content_31029691.htm	http://fz.fjsen.com/2022-05/10/content_31029691.htm
The New 'Carbon' Index of 'Fresh Fujian'	http://ndwm.fjsen.com/2022-05/09/content_31028978.htm	http://ndwm.fjsen.com/2022-05/09/content_31028978.htm
Forge ahead on a new journey, make achievements in the new era, and undergo great changes | The new "carbon" demand of "Fresh Fujian"	http://www.518fuzhou.com/2022-05/09/content_31028948.htm	http://www.518fuzhou.com/2022-05/09/content_31028948.htm
Fuding: Cultivating Large Projects and Constructing Large Parks	http://nd.fjsen.com/2022-05/08/content_31028671.htm	http://nd.fjsen.com/2022-05/08/content_31028671.htm
Excellent! 9 Fujian students have been featured in People's Daily!	http://www.fjsen.com/content/2022-05/07/content_31027979.htm	http://www.fjsen.com/content/2022-05/07/content_31027979.htm
Shanghang: Revolution takes the lead, development strives for excellence	http://fjnews.fjsen.com/2022-05/07/content_31027410.htm	http://fjnews.fjsen.com/2022-05/07/content_31027410.htm
Southeast Automobile City accelerates towards the 'billion dollar town'	http://fz.fjsen.com/2022-05/07/content_31027395.htm	http://fz.fjsen.com/2022-05/07/content_31027395.htm
Zhangzhou: Building a Key Advantageous Industrial Cluster with National Influence	http://zzpd.fjsen.com/2022-05/06/content_31026283.htm	http://zzpd.fjsen.com/2022-05/06/content_31026283.htm
Fujian will provide tiered subsidies for key technological innovation and industrialization projects	http://fjnews.fjsen.com/2022-05/06/content_31026270.htm	http://fjnews.fjsen.com/2022-05/06/content_31026270.htm
Yin Li presides over the second meeting of the 11th Provincial Party Committee Finance and Economics Committee	http://fjnews.fjsen.com/2022-05/05/content_31026043.htm	http://fjnews.fjsen.com/2022-05/05/content_31026043.htm
National May Day Commendation! Five veterans from one unit of our province's veterans affairs system have been included	http://www.fjsen.com/zhuanti/2022-05/05/content_31025625.htm	http://www.fjsen.com/zhuanti/2022-05/05/content_31025625.htm
Efforts are being made in various regions to stabilize industrial growth and stimulate the vitality of small and medium-sized enterprises	http://money.fjsen.com/2022-05/05/content_31025517.htm	http://money.fjsen.com/2022-05/05/content_31025517.htm
Min Mountain, Min Water, Huaxin · New Appearance of Old Areas | Old Areas Never Old, Beautiful and Prosperous	http://wmf.fjsen.com/2022-05/05/content_31025285.htm	http://wmf.fjsen.com/2022-05/05/content_31025285.htm
22 projects with a total investment of 32.6 billion yuan have been signed in the Taiwan Business District through centralized "cloud signing"	http://qz.fjsen.com/2022-05/05/content_31025263.htm	http://qz.fjsen.com/2022-05/05/content_31025263.htm
Acceleration of project construction during the May Day holiday without suspension	http://nd.fjsen.com/2022-05/05/content_31025232.htm	http://nd.fjsen.com/2022-05/05/content_31025232.htm
Introduce a series of policies to ensure supply and stable prices, reduce taxes and fees, and provide financing support - various regions are making efforts to stabilize industrial growth	http://yq.fjsen.com/2022-05/05/content_31025222.htm	http://yq.fjsen.com/2022-05/05/content_31025222.htm
Fujian: Layout new infrastructure, precise efforts to achieve the "dual carbon" goal	http://fjnews.fjsen.com/2022-05/05/content_31025156.htm	http://fjnews.fjsen.com/2022-05/05/content_31025156.htm
Excellent! These 9 students from Fujian have been featured in People's Daily	http://fz.fjsen.com/2022-05/05/content_31025008.htm	http://fz.fjsen.com/2022-05/05/content_31025008.htm
Fixed assets investment in more than 20 provinces grew at a double-digit rate year on year	http://www.fjsen.com/2022-05/03/content_31024441.htm	http://www.fjsen.com/2022-05/03/content_31024441.htm
Local economy starts steadily with improved quality and efficiency	http://www.fjsen.com/2022-04/30/content_31023073.htm	http://www.fjsen.com/2022-04/30/content_31023073.htm
Multiple regions have issued intensive "big gift packages" to help enterprises alleviate their urgent needs and deliver the long-awaited relief	http://www.fjsen.com/2022-04/29/content_31022834.htm	http://www.fjsen.com/2022-04/29/content_31022834.htm
The total investment is 32.6 billion yuan, and 22 projects in the Taiwan Business District have been signed in the cloud	http://qz.fjsen.com/2022-04/29/content_31022236.htm	http://qz.fjsen.com/2022-04/29/content_31022236.htm
Two individuals and three collectives from Zhangzhou were awarded national recognition	http://zzpd.fjsen.com/2022-04/29/content_31022056.htm	http://zzpd.fjsen.com/2022-04/29/content_31022056.htm
Fujian Province's 14th Five Year Plan for Ecological Province Construction Special Plan Released	http://fjnews.fjsen.com/2022-04/29/content_31022096.htm	http://fjnews.fjsen.com/2022-04/29/content_31022096.htm
Record of the "Ecological Province Construction" Special Session of the "14th Five Year Plan" Special Plan Series Press Conference in Fujian Province, Answering Journalists' Questions	http://fjnews.fjsen.com/2022-04/28/content_31021825.htm	http://fjnews.fjsen.com/2022-04/28/content_31021825.htm
Publicity! The list of Fujian Youth May Fourth Medal and "Two Red and Two Excellent" commendations has arrived	http://wmf.fjsen.com/2022-04/28/content_31021115.htm	http://wmf.fjsen.com/2022-04/28/content_31021115.htm
The major arteries of the national trunk highways have been basically opened up (ensuring supply and relieving difficulties in action)	http://www.fjsen.com/2022-04/27/content_31020285.htm	http://www.fjsen.com/2022-04/27/content_31020285.htm
Ningde Era: The curtain of the new energy vehicle battery swapping industry is gradually opening	http://fjnews.fjsen.com/2022-04/27/content_31019873.htm	http://fjnews.fjsen.com/2022-04/27/content_31019873.htm
Fujian Provincial Governor Zhao Long: Fully implement the important requirements of the "Four Greats" and comprehensively promote high-quality development beyond	http://fjjj.fjsen.com/2022-04/26/content_31019635.htm	http://fjjj.fjsen.com/2022-04/26/content_31019635.htm
Xiamen's GDP grew by 7.5% year-on-year in the first quarter	http://overseas.fjsen.com/2022-04/26/content_31019518.htm	http://overseas.fjsen.com/2022-04/26/content_31019518.htm
Provincial Marine High end Equipment Industry Measurement and Testing Center Approved for Construction in Xiamen	http://xm.fjsen.com/2022-04/26/content_31019223.htm	http://xm.fjsen.com/2022-04/26/content_31019223.htm
Fuzhou: Linking the 'Strongest Brain' Leads to 'Singles Champion'	http://fz.fjsen.com/2022-04/26/content_31018837.htm	http://fz.fjsen.com/2022-04/26/content_31018837.htm
Zhao Long: Fully implement the important requirements of the "Four Greats" and comprehensively promote high-quality development beyond	http://fjnews.fjsen.com/2022-04/26/content_31018648.htm	http://fjnews.fjsen.com/2022-04/26/content_31018648.htm
In the first quarter, the gross domestic product of Fujian region reached 1.1859 trillion yuan, achieving a stable and successful start	http://fjnews.fjsen.com/2022-04/25/content_31018581.htm	http://fjnews.fjsen.com/2022-04/25/content_31018581.htm
Fujian Court: Creating a Full Chain Intellectual Property Protection Mechanism with Fujian Characteristics	http://fjnews.fjsen.com/2022-04/25/content_31018583.htm	http://fjnews.fjsen.com/2022-04/25/content_31018583.htm
Shanghang: Seize new opportunities for development and accelerate projects	http://ly.fjsen.com/2022-04/25/content_31022433.htm	http://ly.fjsen.com/2022-04/25/content_31022433.htm
Zhao Long published a signed article in the Study Times	http://fjnews.fjsen.com/2022-04/25/content_31018329.htm	http://fjnews.fjsen.com/2022-04/25/content_31018329.htm
Fujian increases policy support for the entire electric ship industry chain	http://overseas.fjsen.com/2022-04/25/content_31018163.htm	http://overseas.fjsen.com/2022-04/25/content_31018163.htm
Zhangzhou Zhao'an: Based on the overall promotion of building a strong marine economy county	http://zzpd.fjsen.com/2022-04/25/content_31017190.htm	http://zzpd.fjsen.com/2022-04/25/content_31017190.htm
Fujian issues development plan for new energy vehicle industry, creating trillion level industrial clusters	http://fjnews.fjsen.com/2022-04/25/content_31017786.htm	http://fjnews.fjsen.com/2022-04/25/content_31017786.htm
Cross provincial connectivity "makes it easier to handle affairs in different locations	http://news.fjsen.com/2022-04/25/content_31017733.htm	http://news.fjsen.com/2022-04/25/content_31017733.htm
Fujian Province takes multiple measures to promote the development and growth of the new energy vehicle industry. Fuzhou's new energy battery industry is expanding in scale	http://fz.fjsen.com/2022-04/25/content_31017658.htm	http://fz.fjsen.com/2022-04/25/content_31017658.htm
Xiamen Haicang held a cooperation and exchange meeting between industrial and district owned construction enterprises	http://xm.fjsen.com/2022-04/24/content_31017043.htm	http://xm.fjsen.com/2022-04/24/content_31017043.htm
Fujian's economy achieved a stable and prosperous start in the first quarter	http://fjnews.fjsen.com/2022-04/23/content_31016201.htm	http://fjnews.fjsen.com/2022-04/23/content_31016201.htm
In 2021, the two levels of courts in Fuzhou accepted a total of 3228 civil cases related to intellectual property and concluded 3146 cases	http://fjnews.fjsen.com/2022-04/22/content_31016053.htm	http://fjnews.fjsen.com/2022-04/22/content_31016053.htm
Silla implements the "5+1" special action to tackle project challenges, unleashing full development vitality	http://ly.fjsen.com/2022-04/22/content_31022847.htm	http://ly.fjsen.com/2022-04/22/content_31022847.htm
Liancheng: Speed up projects, improve quality and efficiency, revitalize industries in 'Kowloon'	http://ly.fjsen.com/2022-04/22/content_31022858.htm	http://ly.fjsen.com/2022-04/22/content_31022858.htm
Guarding the red line of arable land and ensuring food security	http://nd.fjsen.com/2022-04/22/content_31015701.htm	http://nd.fjsen.com/2022-04/22/content_31015701.htm
Xiamen Free Trade Zone: Accelerating Digital Free Trade Empowerment	http://overseas.fjsen.com/2022-04/22/content_31015248.htm	http://overseas.fjsen.com/2022-04/22/content_31015248.htm
The total investment is 194.1 billion yuan! 253 major projects in Fujian Province started construction in the second quarter	http://overseas.fjsen.com/2022-04/20/content_31012888.htm	http://overseas.fjsen.com/2022-04/20/content_31012888.htm
Side note on the concentrated commencement of major projects in the second quarter of Fujian Province	http://fjnews.fjsen.com/2022-04/20/content_31012742.htm	http://fjnews.fjsen.com/2022-04/20/content_31012742.htm
Fujian Rongneng Group: Promoting Photovoltaic EPC and Building a New Power System with New Energy as the Main Body	http://fjnews.fjsen.com/2022-04/19/content_31012546.htm	http://fjnews.fjsen.com/2022-04/19/content_31012546.htm
First quarter economic data release - China's economy has started steadily with strong resilience (stability at the forefront, seeking progress while maintaining stability, the fundamentals of long-term economic improvement have not changed)	http://www.fjsen.com/2022-04/19/content_31012108.htm	http://www.fjsen.com/2022-04/19/content_31012108.htm
Xinhua Daily Telegraph pays attention to Fuzhou: New pattern of "strong provincial capital" construction unleashes new vitality	http://fz.fjsen.com/2022-04/19/content_31011994.htm	http://fz.fjsen.com/2022-04/19/content_31011994.htm
Practice and Inspiration of Fujian Ecological Province Construction	http://fjnews.fjsen.com/2022-04/18/content_31010793.htm	http://fjnews.fjsen.com/2022-04/18/content_31010793.htm
Fuzhou accelerates the construction of an aluminum based new material industry base	http://fz.fjsen.com/2022-04/18/content_31010622.htm	http://fz.fjsen.com/2022-04/18/content_31010622.htm
Looking at this Guanshan, it looks even better today - Observation of the High Quality Development of the Central Soviet Area in Jiangxi, Fujian, and Guangdong	http://www.fjsen.com/zhuanti/2022-04/17/content_31033522.htm	http://www.fjsen.com/zhuanti/2022-04/17/content_31033522.htm
Stronger Industry and Better Development - Observations from the Frontline of Fuzhou's "Strong Provincial Capital" Construction	http://fz.fjsen.com/2022-04/17/content_31010356.htm	http://fz.fjsen.com/2022-04/17/content_31010356.htm
The Central Soviet Area of Jiangxi, Fujian, and Guangdong - Inheriting the Red Gene and Promoting High Quality Development (Advancing on a New Journey, Making Achievements in a New Era, and Revitalizing the Old Areas)	http://www.fjsen.com/2022-04/16/content_31010072.htm	http://www.fjsen.com/2022-04/16/content_31010072.htm
Exploring the Central Soviet Area of Jiangxi, Fujian, and Guangdong - Grateful for the New Look of the Red Soil Land (Striving for a New Journey, Making Achievements in the New Era, and the New Appearance of the Old Area)	http://www.fjsen.com/2022-04/16/content_31010070.htm	http://www.fjsen.com/2022-04/16/content_31010070.htm
Typical Cases of the "Iron Fist" Action to Investigate and Handle Cases in the Field of Livelihood in 2022 (First Batch)	http://www.fjsen.com/zhuanti/2022-04/15/content_31009364.htm	http://www.fjsen.com/zhuanti/2022-04/15/content_31009364.htm
The State Administration for Market Regulation announces the first batch of typical cases of the 2022 "Iron Fist" action	http://www.fjsen.com/2022-04/15/content_31009307.htm	http://www.fjsen.com/2022-04/15/content_31009307.htm
Cloud based communication between Chinese and Pakistani enterprises to explore investment opportunities in Brazil	http://xm.fjsen.com/2022-04/15/content_31008659.htm	http://xm.fjsen.com/2022-04/15/content_31008659.htm
Lin Baojin: Strengthening Responsibility, Pioneering and Accelerating the Construction of the Core Area of Fuzhou Urban Circle	http://fz.fjsen.com/2022-04/15/content_31008683.htm	http://fz.fjsen.com/2022-04/15/content_31008683.htm
Yanping: Ecological cycle breeding road full of "cow" vitality and new energy	http://np.fjsen.com/2022-04/14/content_31008457.htm	http://np.fjsen.com/2022-04/14/content_31008457.htm
Xiamen Quality Inspection Institute has been approved to construct a provincial-level key laboratory in the field of marine information science	http://www.fjsen.com/zhuanti/2022-04/14/content_31008226.htm	http://www.fjsen.com/zhuanti/2022-04/14/content_31008226.htm
Invest 33 billion! The new display panel production line will be "Denglu"	http://xm.fjsen.com/2022-04/14/content_31007491.htm	http://xm.fjsen.com/2022-04/14/content_31007491.htm
National May Day Labor Award and Worker Pioneer List Publicity! Fujian's list includes	http://fjnews.fjsen.com/2022-04/13/content_31006757.htm	http://fjnews.fjsen.com/2022-04/13/content_31006757.htm
Sanming: Project 'Tengyun' to accelerate development	http://overseas.fjsen.com/2022-04/12/content_31005624.htm	http://overseas.fjsen.com/2022-04/12/content_31005624.htm
Fuzhou Mawei has moved from an industrial cradle to an innovation highland, injecting strong momentum into high-quality development - the innovation strong zone takes the lead	http://www.fzccpit.org/2022-04/11/content_31004587.htm	http://www.fzccpit.org/2022-04/11/content_31004587.htm
Mawei: Innovation driven Zone Leading the Way	http://fjnews.fjsen.com/2022-04/11/content_31004256.htm	http://fjnews.fjsen.com/2022-04/11/content_31004256.htm
Press conference on joint prevention and control of COVID-19 in Fujian Province	http://fjnews.fjsen.com/2022-04/07/content_31002467.htm	http://fjnews.fjsen.com/2022-04/07/content_31002467.htm
The acceleration of the "new engine" of the digital economy leads to high-quality development of industries	http://nd.fjsen.com/2022-04/07/content_31001882.htm	http://nd.fjsen.com/2022-04/07/content_31001882.htm
Mountains and Rivers Without Obstacles: Sanming Full of Love and Supplies, Working Night and Day to Ensure Shanghai's Fight Against the Epidemic	http://sm.fjsen.com/2022-04/07/content_31001545.htm	http://sm.fjsen.com/2022-04/07/content_31001545.htm
Chasing the cold and chasing the heat, this' snowman 'is extraordinary	http://fz.fjsen.com/2022-04/06/content_31001018.htm	http://fz.fjsen.com/2022-04/06/content_31001018.htm
Fuzhou accelerates the race for new energy vehicles	http://www.518fuzhou.com/2022-04/06/content_31000733.htm	http://www.518fuzhou.com/2022-04/06/content_31000733.htm
Deep affection between Shanghai and Fujian! There is an unforgettable story behind it	http://fjnews.fjsen.com/2022-04/04/content_30999881.htm	http://fjnews.fjsen.com/2022-04/04/content_30999881.htm
Fujian offshore wind power construction accelerates (steadily moving forward and opening up a new chapter)	http://www.fjsen.com/2022-04/03/content_30999355.htm	http://www.fjsen.com/2022-04/03/content_30999355.htm
Good news! The Key Laboratory of Toxicology and Drug Toxicology at Ningde Normal University has been approved for provincial-level discipline key laboratory certification and construction	http://nd.fjsen.com/2022-04/01/content_30997641.htm	http://nd.fjsen.com/2022-04/01/content_30997641.htm
Yin Li published a signed article in the "Qiushi" magazine: Striving to write a chapter in the comprehensive construction of a socialist modernized country in Fujian Province	http://ndwm.fjsen.com/2022-04/01/content_30997553.htm	http://ndwm.fjsen.com/2022-04/01/content_30997553.htm
Xiamen: Let talents and special zone construction travel in both directions	http://fjnews.fjsen.com/2022-03/31/content_30996082.htm	http://fjnews.fjsen.com/2022-03/31/content_30996082.htm
Sinopec Fujian Petroleum and Fuyao Group signed a strategic cooperation framework agreement	http://fjnews.fjsen.com/2022-03/31/content_30996081.htm	http://fjnews.fjsen.com/2022-03/31/content_30996081.htm
Economic Review · Sharp Review - Fujian Daily Reporter Column: With the launch of "East Calculation and West Calculation", how should Fujian "calculate"?	http://fjnews.fjsen.com/2022-03/31/content_30996065.htm	http://fjnews.fjsen.com/2022-03/31/content_30996065.htm
Industrial Bank Ningde Branch's "Sci Tech Innovation Cloud Loan" supports the development of science and technology innovation enterprises	http://nd.fjsen.com/2022-03/31/content_30995939.htm	http://nd.fjsen.com/2022-03/31/content_30995939.htm
Dedicated to protecting trade secrets! Fujian announces the list of "front-line soldiers"!	http://www.fjsen.com/zhuanti/2022-03/30/content_30995388.htm	http://www.fjsen.com/zhuanti/2022-03/30/content_30995388.htm
Set sail with the sea, 'Made in Zhangzhou' heading towards' Deep Blue '	http://fjnews.fjsen.com/2022-03/29/content_30993781.htm	http://fjnews.fjsen.com/2022-03/29/content_30993781.htm
Echoes of Spring | Standing at the forefront of the tide bravely, a "heron" rushes through the waves of the new era	http://fjnews.fjsen.com/2022-03/29/content_30993780.htm	http://fjnews.fjsen.com/2022-03/29/content_30993780.htm
This year, the land of Bamin has been vigorously advancing: setting sail with high quality, embarking on a new journey, and promoting new breakthroughs in all aspects	http://fjnews.fjsen.com/2022-03/26/content_30991963.htm	http://fjnews.fjsen.com/2022-03/26/content_30991963.htm
New energy generation lights up the beautiful rural life in Pingtan	http://ptxw.fjsen.com/2022-03/25/content_30991628.htm	http://ptxw.fjsen.com/2022-03/25/content_30991628.htm
Grateful for this year of progress | Minhou: "Three Cities" are about to emerge and see the answer sheet of "Shouyi"	http://fz.fjsen.com/2022-03/25/content_30991555.htm	http://fz.fjsen.com/2022-03/25/content_30991555.htm
Grateful for this year of progress | Fuzhou strives to deliver excellent results in the construction of "Maritime Fuzhou"	http://fz.fjsen.com/2022-03/25/content_30991547.htm	http://fz.fjsen.com/2022-03/25/content_30991547.htm
Brave and resolute, taking the lead in achieving modernization and making greater breakthroughs	http://www.fzccpit.org/2022-03/25/content_30991261.htm	http://www.fzccpit.org/2022-03/25/content_30991261.htm
Sanming Mingxi: Add a Postdoctoral Innovation Practice Base	http://sm.fjsen.com/2022-03/24/content_30990603.htm	http://sm.fjsen.com/2022-03/24/content_30990603.htm
State Grid: Fuzhou Xiamen and Zhumadian Wuhan 1000 kV High Voltage AC Projects Start Construction	http://fjnews.fjsen.com/2022-03/24/content_30990555.htm	http://fjnews.fjsen.com/2022-03/24/content_30990555.htm
Mawei, regardless of background, strives to build an innovative leading area	http://www.fzccpit.org/2022-03/24/content_30990142.htm	http://www.fzccpit.org/2022-03/24/content_30990142.htm
Serving the green economy, Fujian Institute of Metrology has launched this "combination punch"	http://www.fjsen.com/content/2022-03/23/content_30989688.htm	http://www.fjsen.com/content/2022-03/23/content_30989688.htm
Announcement on the Recommended List of Fujian Province's 2022 National May Day Labor Award and National Worker Pioneer Number	http://fjnews.fjsen.com/2022-03/23/content_30989287.htm	http://fjnews.fjsen.com/2022-03/23/content_30989287.htm
Change in Pattern - Fuqing strives to demonstrate greater achievements in serving and integrating into the new development pattern	http://www.fzccpit.org/2022-03/23/content_30989143.htm	http://www.fzccpit.org/2022-03/23/content_30989143.htm
Let green mountains and clear waters forever be the pride of Fujian	http://overseas.fjsen.com/2022-03/22/content_30988075.htm	http://overseas.fjsen.com/2022-03/22/content_30988075.htm
Fujian: The modern economic system plays a "quartet"	http://fjnews.fjsen.com/2022-03/22/content_30987811.htm	http://fjnews.fjsen.com/2022-03/22/content_30987811.htm
Strive to achieve the maximum prevention and control effect with the minimum cost - General Secretary Xi Jinping's important speech at the meeting of the Standing Committee of the Central Political Bureau points out the direction and boosts the enthusiasm for coordinating epidemic prevention and control with economic and social development	http://www.fjsen.com/2022-03/21/content_30987765.htm	http://www.fjsen.com/2022-03/21/content_30987765.htm
Publicity! These individuals and collectives from Fujian have been selected as the "Upward and Good Youth" for 2022	http://fjnews.fjsen.com/2022-03/21/content_30987713.htm	http://fjnews.fjsen.com/2022-03/21/content_30987713.htm
General Secretary's important speech points out the direction and boosts enthusiasm for coordinating epidemic prevention and control with economic and social development	http://fjjj.fjsen.com/2022-03/21/content_30987079.htm	http://fjjj.fjsen.com/2022-03/21/content_30987079.htm
Joining hands with Huawei Cloud to promote 'Supercharging Station' in Fuzhou	http://www.fzccpit.org/2022-03/21/content_30987037.htm	http://www.fzccpit.org/2022-03/21/content_30987037.htm
Fujian's economy achieved a 'good start' in the first two months of this year	http://fjnews.fjsen.com/2022-03/18/content_30985990.htm	http://fjnews.fjsen.com/2022-03/18/content_30985990.htm
Promote fair consumption and create high-quality life together | Automobile "three guarantees"	http://www.fjsen.com/zhuanti/2022-03/17/content_30984710.htm	http://www.fjsen.com/zhuanti/2022-03/17/content_30984710.htm
Ningde, Fujian: Accelerating the Construction of National Rural Revitalization Model Areas	http://yq.fjsen.com/2022-03/17/content_30984204.htm	http://yq.fjsen.com/2022-03/17/content_30984204.htm
[Authoritative Interpretation] The policy of stabilizing growth continues to show effectiveness, and industrial production continues to rebound	http://www.fjsen.com/2022-03/16/content_30982892.htm	http://www.fjsen.com/2022-03/16/content_30982892.htm
Grateful for the year ahead: Zhangzhou sailing with determination	http://fjnews.fjsen.com/2022-03/15/content_30982381.htm	http://fjnews.fjsen.com/2022-03/15/content_30982381.htm
Registration for the Fujian Provincial Selection Competition of the 5th "China Chuangyi" Entrepreneurship and Innovation Competition has begun	http://fq.fjsen.com/2022-03/15/content_30982236.htm	http://fq.fjsen.com/2022-03/15/content_30982236.htm
Gutian: Mushroom Shed+Photovoltaic Revitalization with Strong Momentum	http://nd.fjsen.com/2022-03/15/content_30981917.htm	http://nd.fjsen.com/2022-03/15/content_30981917.htm
Ma Wei Technology Innovation Exhibition Center is put into use to create a new ideological learning and education practice base	http://fz.fjsen.com/2022-03/15/content_30981814.htm	http://fz.fjsen.com/2022-03/15/content_30981814.htm
Diversified industries lead high-quality development, Fuzhou accelerates the construction of a modern economic system	http://www.fzccpit.org/2022-03/14/content_30981055.htm	http://www.fzccpit.org/2022-03/14/content_30981055.htm
Fujian Provincial Consumer Council announces 2021 consumer complaint hotspots, beware of these 'pitfalls'	http://fjnews.fjsen.com/2022-03/13/content_30980724.htm	http://fjnews.fjsen.com/2022-03/13/content_30980724.htm
Longyan: Upgrading and upgrading the mechanical equipment industry	http://fjnews.fjsen.com/2022-03/13/content_30980583.htm	http://fjnews.fjsen.com/2022-03/13/content_30980583.htm
Nanping Minou Aluminum Industry: Recycling of scrap aluminum with a metal recovery rate of over 85%	http://np.fjsen.com/2022-03/11/content_30980044.htm	http://np.fjsen.com/2022-03/11/content_30980044.htm
Eastern Spring Comes Early, Strive for the Future! 2022 National Two Sessions Tour	http://www.fjsen.com/2022-03/11/content_30979654.htm	http://www.fjsen.com/2022-03/11/content_30979654.htm
Xiamen strives to cash in 123 million yuan of enterprise assistance funds in the first quarter	http://xm.fjsen.com/2022-03/11/content_30979537.htm	http://xm.fjsen.com/2022-03/11/content_30979537.htm
Wuyi New District High tech Industrial Park: Striving with determination and steady steps	http://np.fjsen.com/2022-03/11/content_30979460.htm	http://np.fjsen.com/2022-03/11/content_30979460.htm
Good news is frequent about the construction of the Silk Road Port City	http://fz.fjsen.com/2022-03/11/content_30979396.htm	http://fz.fjsen.com/2022-03/11/content_30979396.htm
Zijin Mining, Chenglongjing Environmental Protection, the second largest shareholder	http://fjnews.fjsen.com/2022-03/10/content_30978627.htm	http://fjnews.fjsen.com/2022-03/10/content_30978627.htm
Fujian Provincial Representatives and Members Revisit General Secretary Xi Jinping's Important Speech on His Visit to Fujian Last Year	http://fjnews.fjsen.com/2022-03/10/content_30978330.htm	http://fjnews.fjsen.com/2022-03/10/content_30978330.htm
Zhao Long accepted an interview with Economic Daily: Accelerating the construction of a modern economic system	http://fjnews.fjsen.com/2022-03/07/content_30975893.htm	http://fjnews.fjsen.com/2022-03/07/content_30975893.htm
Focus of the Two Sessions: shifting from factor driven to innovation driven	http://fjnews.fjsen.com/2022-03/06/content_30974501.htm	http://fjnews.fjsen.com/2022-03/06/content_30974501.htm
Xiamen: Consolidating the "ballast stone" of the economy	http://overseas.fjsen.com/2022-03/04/content_30973393.htm	http://overseas.fjsen.com/2022-03/04/content_30973393.htm
Singing the Concerto of 'Economic Belt Along the Minjiang River' to the Sea	http://nd.fjsen.com/2022-03/03/content_30972797.htm	http://nd.fjsen.com/2022-03/03/content_30972797.htm
Fujian Institute of Metrology has achieved phased results of a fast start and stable opening	http://www.fjsen.com/zhuanti/2022-03/03/content_30972718.htm	http://www.fjsen.com/zhuanti/2022-03/03/content_30972718.htm
Member Zeng Yuqun: Persistently Focus on the Development of New Energy Industry	http://nd.fjsen.com/2022-03/03/content_30972460.htm	http://nd.fjsen.com/2022-03/03/content_30972460.htm
People work hard, spring comes early - a scan of current economic and social development across the country	http://news.fjsen.com/2022-03/02/content_30971851.htm	http://news.fjsen.com/2022-03/02/content_30971851.htm
People's Daily praises Fuzhou craftsman Yang Guo: dedicated to research and excellence	http://fjnews.fjsen.com/2022-03/02/content_30971543.htm	http://fjnews.fjsen.com/2022-03/02/content_30971543.htm
Gathering talents and attracting wisdom, creating a new engine for high-quality development	http://sm.fjsen.com/2022-03/02/content_30971173.htm	http://sm.fjsen.com/2022-03/02/content_30971173.htm
Key projects in Xiamen are making full efforts to sprint for the first quarter and have a good start	http://xm.fjsen.com/2022-03/02/content_30971117.htm	http://xm.fjsen.com/2022-03/02/content_30971117.htm
Longyan Shanghang Jiaoyang Industrial Zone forms a safety production alliance to jointly improve safety levels	http://fjnews.fjsen.com/2022-03/01/content_30971089.htm	http://fjnews.fjsen.com/2022-03/01/content_30971089.htm
Xiamen: 419 projects with actual completed investment of 14.99 billion yuan	http://xm.fjsen.com/2022-03/01/content_30970209.htm	http://xm.fjsen.com/2022-03/01/content_30970209.htm
The entire Longyan area is included in the planning and receives key support	http://ly.fjsen.com/2022-02/28/content_30970145.htm	http://ly.fjsen.com/2022-02/28/content_30970145.htm
Promoting innovative development in metrology around "improving efficiency, enhancing effectiveness, and increasing benefits"	http://www.fjsen.com/zhuanti/2022-02/28/content_30969624.htm	http://www.fjsen.com/zhuanti/2022-02/28/content_30969624.htm
Strong muscles and bones, forging the engine of development	http://yq.fjsen.com/2022-02/28/content_30969487.htm	http://yq.fjsen.com/2022-02/28/content_30969487.htm
Clarify the "planning map" and "construction map", and take firm steps towards low-carbon development in various regions	http://yq.fjsen.com/2022-02/28/content_30969486.htm	http://yq.fjsen.com/2022-02/28/content_30969486.htm
Take back the 'Golden Doll' and recite the 'Classic of Mountains and Seas'	http://www.fjsen.com/2022-02/27/content_30969197.htm	http://www.fjsen.com/2022-02/27/content_30969197.htm
Ningde's first county-level economy with a GDP growth rate of 100 billion yuan has achieved "four consecutive championships" in the province	http://nd.fjsen.com/2022-02/27/content_30969381.htm	http://nd.fjsen.com/2022-02/27/content_30969381.htm
Ningde Jiaocheng District: 'Top students' have strong momentum in the future	http://fjnews.fjsen.com/2022-02/27/content_30969075.htm	http://fjnews.fjsen.com/2022-02/27/content_30969075.htm
Brave innovation, high-quality development is like adding wings to a tiger (forging ahead on a new journey, making achievements in a new era, seeking progress while maintaining stability, and opening up a new chapter ④)	http://www.fjsen.com/2022-02/26/content_30969001.htm	http://www.fjsen.com/2022-02/26/content_30969001.htm
Fujian photovoltaic power generation enters the fast lane	http://fjnews.fjsen.com/2022-02/25/content_30968242.htm	http://fjnews.fjsen.com/2022-02/25/content_30968242.htm
Putian: The project empowers "new energy" with full power	http://fjnews.fjsen.com/2022-02/24/content_30967013.htm	http://fjnews.fjsen.com/2022-02/24/content_30967013.htm
Fujian Communist Youth League launches "Sail Plan · Attract Talents to Enterprises" campaign to help enterprises fight for a "good start"	http://fjnews.fjsen.com/2022-02/23/content_30966980.htm	http://fjnews.fjsen.com/2022-02/23/content_30966980.htm
The demonstration and operation ceremony for the application of battery swapping heavy-duty trucks in Fujian Province was held in our city	http://nd.fjsen.com/2022-02/23/content_30966338.htm	http://nd.fjsen.com/2022-02/23/content_30966338.htm
The signing ceremony of the joint venture agreement for the Sun Submarine Cable Project in Dongshan County, Zhangzhou City was held	http://zzpd.fjsen.com/2022-02/23/content_30966412.htm	http://zzpd.fjsen.com/2022-02/23/content_30966412.htm
The largest single unit capacity wind turbine in Asia is offline in Fuqing	http://fz.fjsen.com/2022-02/22/content_30965781.htm	http://fz.fjsen.com/2022-02/22/content_30965781.htm
Multiple departments jointly introduce 18 specific measures in 5 aspects to promote stable growth of industrial economy	http://news.fjsen.com/2022-02/22/content_30965702.htm	http://news.fjsen.com/2022-02/22/content_30965702.htm
Yin Li meets with Yu Bacon, Chairman of Dongfang Electric Group	http://women.fjsen.com/2022-02/22/content_30965333.htm	http://women.fjsen.com/2022-02/22/content_30965333.htm
Mingxi New Energy Industry Party Building Alliance has achieved remarkable results	http://sm.fjsen.com/2022-02/22/content_30965322.htm	http://sm.fjsen.com/2022-02/22/content_30965322.htm
Fuzhou Free Trade Zone cultivates new export formats for second-hand cars	http://www.518fuzhou.com/2022-02/21/content_30965148.htm	http://www.518fuzhou.com/2022-02/21/content_30965148.htm
Fuding: Starting with running and sprinting to achieve a 'good start'	http://nd.fjsen.com/2022-02/19/content_30964430.htm	http://nd.fjsen.com/2022-02/19/content_30964430.htm
Quanzhou Luojiang: Private economy steps forward and enterprises have a good start in the new year	http://qz.fjsen.com/2022-02/18/content_30963987.htm	http://qz.fjsen.com/2022-02/18/content_30963987.htm
Good start! Cangshan District holds the 2022 "Yanshan Magpie Bridge Gathering" investment and financing docking meeting	http://fz.fjsen.com/2022-02/18/content_30963916.htm	http://fz.fjsen.com/2022-02/18/content_30963916.htm
Industrial and Commercial Bank of China Fujian Branch: Fully Serving Supply Side Reform and Supporting High Quality Development of Manufacturing Industry	http://money.fjsen.com/2022-02/18/content_30963905.htm	http://money.fjsen.com/2022-02/18/content_30963905.htm
State Grid Changle District Power Supply Company: Proactively connecting with precise services to help enterprises resume production with a "good start"	http://cl.fjsen.com/2022-02/18/content_30963509.htm	http://cl.fjsen.com/2022-02/18/content_30963509.htm
Notice on Issuing Several Policies to Promote Stable Growth of Industrial Economy	http://www.fjsen.com/2022-02/18/content_30963734.htm	http://www.fjsen.com/2022-02/18/content_30963734.htm
Warm hearted labor guidance helps enterprises stabilize and ensure employment, solving the labor demand of 9009 people	http://nd.fjsen.com/2022-02/18/content_30963479.htm	http://nd.fjsen.com/2022-02/18/content_30963479.htm
Fujian takes multiple measures to solve the problem of post holiday employment	http://fjnews.fjsen.com/2022-02/18/content_30963213.htm	http://fjnews.fjsen.com/2022-02/18/content_30963213.htm
Fuqing: Make efforts to accelerate the construction of a new beginning	http://fjnews.fjsen.com/2022-02/18/content_30963162.htm	http://fjnews.fjsen.com/2022-02/18/content_30963162.htm
China Pavilion Fujian Activity Day: Innovation Land Debuts in the World	http://overseas.fjsen.com/2022-02/17/content_30962613.htm	http://overseas.fjsen.com/2022-02/17/content_30962613.htm
Innovation Land Debuts in the World	http://www.fzccpit.org/2022-02/17/content_30962602.htm	http://www.fzccpit.org/2022-02/17/content_30962602.htm
Press conference for the 2020 Dubai World Expo China Pavilion Fujian Activity Day, answering questions from reporters	http://fjnews.fjsen.com/2022-02/16/content_30962043.htm	http://fjnews.fjsen.com/2022-02/16/content_30962043.htm
New Year at the grassroots level | One night of spring breeze brings thousands of trees and pear blossoms - the development of new industries stimulates the landing of industrial park projects in mountainous counties	http://www.fjsen.com/2022-02/16/content_30962080.htm	http://www.fjsen.com/2022-02/16/content_30962080.htm
2021 Xiamen City Industry Leading Enterprises List Involving Five Major Fields Released	http://xm.fjsen.com/2022-02/16/content_30961883.htm	http://xm.fjsen.com/2022-02/16/content_30961883.htm
Patent applications in Ningde City are on the 'highway'	http://www.fjsen.com/zhuanti/2022-02/16/content_30961723.htm	http://www.fjsen.com/zhuanti/2022-02/16/content_30961723.htm
Ningde: Thoughtful labor introduction	http://nd.fjsen.com/2022-02/16/content_30961389.htm	http://nd.fjsen.com/2022-02/16/content_30961389.htm
Lianjiang Investment Promotion 'Tiger Power' Fully Opened	http://fz.fjsen.com/2022-02/16/content_30961286.htm	http://fz.fjsen.com/2022-02/16/content_30961286.htm
The tiger's power is fully unleashed! On site construction and completion of 7 projects with a total investment of 3.323 billion yuan. Huian County held a centralized project construction and completion activity for the first quarter of 2022	http://qz.fjsen.com/2022-02/15/content_30961237.htm	http://qz.fjsen.com/2022-02/15/content_30961237.htm
The transformation and growth path of Fuzhou Liuhe Machinery: exchanging innovation for sincerity, from manufacturing to intelligent manufacturing	http://fz.fjsen.com/2022-02/15/content_30960298.htm	http://fz.fjsen.com/2022-02/15/content_30960298.htm
Zhangzhou: Bulk export of electric buses	http://fjnews.fjsen.com/2022-02/14/content_30959199.htm	http://fjnews.fjsen.com/2022-02/14/content_30959199.htm
Fuding strengthens park services to help enterprises sprint for the first quarter and achieve a good start	http://nd.fjsen.com/2022-02/13/content_30959163.htm	http://nd.fjsen.com/2022-02/13/content_30959163.htm
Fujian's smart manufacturing 'stupid little treasure' on duty at the Winter Olympics, stunning Chinese and foreign guests! The backstory is not simple	http://fjnews.fjsen.com/2022-02/12/content_30958738.htm	http://fjnews.fjsen.com/2022-02/12/content_30958738.htm
Mingxi: Cultivating characteristic industries	http://fjnews.fjsen.com/2022-02/12/content_30958662.htm	http://fjnews.fjsen.com/2022-02/12/content_30958662.htm
Full of Tiger Power, Fuzhou High tech Zone Enterprises Launch Production 'Acceleration Mode'	http://fz.fjsen.com/2022-02/11/content_30958459.htm	http://fz.fjsen.com/2022-02/11/content_30958459.htm
China (Ningde) Intellectual Property Protection Center is put into use	http://hk.fjsen.com/2022-02/11/content_30958392.htm	http://hk.fjsen.com/2022-02/11/content_30958392.htm
Wan Gang "welcomes spring" employment without having to go far away. Since the beginning of spring this year, the city has held 19 job fairs	http://nd.fjsen.com/2022-02/11/content_30958266.htm	http://nd.fjsen.com/2022-02/11/content_30958266.htm
Fujian: Gathering Strength Projects Blows the Horn of Development	http://women.fjsen.com/2022-02/11/content_30958206.htm	http://women.fjsen.com/2022-02/11/content_30958206.htm
Observation of Industrial Economic Trends in the Year of the Tiger, Starting Season, with Full Vigor and Steady Progress	http://yq.fjsen.com/2022-02/11/content_30958136.htm	http://yq.fjsen.com/2022-02/11/content_30958136.htm
Start construction and open up a new production channel	http://fjnews.fjsen.com/2022-02/10/content_30957118.htm	http://fjnews.fjsen.com/2022-02/10/content_30957118.htm
Report on the Implementation of Fujian Province's 2021 National Economic and Social Development Plan and the Draft 2022 National Economic and Social Development Plan	http://fjnews.fjsen.com/2022-02/09/content_30956379.htm	http://fjnews.fjsen.com/2022-02/09/content_30956379.htm
Industrial Bank Ningde Branch completes the approval of the first "technology flow" evaluation system loan	http://nd.fjsen.com/2022-02/09/content_30970674.htm	http://nd.fjsen.com/2022-02/09/content_30970674.htm
Zhangzhou City strives to achieve a total industrial output value of over one trillion yuan by 2025	http://zzpd.fjsen.com/2022-02/09/content_30956244.htm	http://zzpd.fjsen.com/2022-02/09/content_30956244.htm
Cracking the Energy Conversion Password	http://fjnews.fjsen.com/2022-02/09/content_30956136.htm	http://fjnews.fjsen.com/2022-02/09/content_30956136.htm
230 major projects in Fujian started construction in the first quarter	http://money.fjsen.com/2022-02/08/content_30955704.htm	http://money.fjsen.com/2022-02/08/content_30955704.htm
Fujian: On the first day of construction after the holiday, we will do our best to get off to a good start	http://overseas.fjsen.com/2022-02/08/content_30955591.htm	http://overseas.fjsen.com/2022-02/08/content_30955591.htm
12 major projects in Mawei have started construction with a total investment of 13.754 billion yuan	http://fz.fjsen.com/2022-02/08/content_30955458.htm	http://fz.fjsen.com/2022-02/08/content_30955458.htm
Nine key projects in the high-tech zone have started construction with a total investment of 3.35 billion yuan	http://fz.fjsen.com/2022-02/08/content_30955446.htm	http://fz.fjsen.com/2022-02/08/content_30955446.htm
Focusing on the "dual carbon" goal to promote green development, Nanping City actively explores the leading path of carbon peak and carbon neutrality	http://np.fjsen.com/2022-02/08/content_30955329.htm	http://np.fjsen.com/2022-02/08/content_30955329.htm
Ningde: Sprint for a "good start" and play the "symphony" of the Chinese New Year	http://nd.fjsen.com/2022-02/07/content_30955277.htm	http://nd.fjsen.com/2022-02/07/content_30955277.htm
Xingyun Corporation: Employees are willing to contribute to the company and share achievements	http://fz.fjsen.com/2022-02/05/content_30953650.htm	http://fz.fjsen.com/2022-02/05/content_30953650.htm
High quality implementation of the national strategy of peaking carbon emissions and achieving carbon neutrality	http://news.fjsen.com/2022-02/03/content_30953132.htm	http://news.fjsen.com/2022-02/03/content_30953132.htm
Good start | Sanming Mingxi: full of enthusiasm for transformation and improvement	http://sm.fjsen.com/2022-01/31/content_30952318.htm	http://sm.fjsen.com/2022-01/31/content_30952318.htm
Tax reduction and fee reduction "red envelope" to boost confidence in the development of Rong enterprises	http://fz.fjsen.com/2022-01/30/content_30951533.htm	http://fz.fjsen.com/2022-01/30/content_30951533.htm
Officials and masses in Quanzhou City study, publicize, and implement the spirit of the Provincial Two Sessions	http://qz.fjsen.com/2022-01/29/content_30950725.htm	http://qz.fjsen.com/2022-01/29/content_30950725.htm
Xiamen's scientific and technological work has delivered a brilliant answer sheet for the start of the 14th Five Year Plan	http://xm.fjsen.com/2022-01/29/content_30950666.htm	http://xm.fjsen.com/2022-01/29/content_30950666.htm
Anxi: Warmth for Enterprises, Benefit Enterprises with More Heart, Special Products, Gift Packages, and Blessings	http://qz.fjsen.com/2022-01/28/content_30949967.htm	http://qz.fjsen.com/2022-01/28/content_30949967.htm
Zhangzhou: The more hard won it is, the more we must seize the opportunity to move forward	http://zzpd.fjsen.com/2022-01/28/content_30951348.htm	http://zzpd.fjsen.com/2022-01/28/content_30951348.htm
Technological assistance improves quality, collaborative services empower development | The "Two Hundred Thousand" Action of our province's metrology services for the real economy has achieved remarkable results	http://www.fjsen.com/zhuanti/2022-01/27/content_30949117.htm	http://www.fjsen.com/zhuanti/2022-01/27/content_30949117.htm
Good start! Zhangzhou new energy mini bus wins orders from automobile manufacturing powerhouse	http://zzpd.fjsen.com/2022-01/27/content_30948888.htm	http://zzpd.fjsen.com/2022-01/27/content_30948888.htm
Zijin Mining opens up a new energy "new track"	http://fjnews.fjsen.com/2022-01/27/content_30948824.htm	http://fjnews.fjsen.com/2022-01/27/content_30948824.htm
Ningde's' Carbon 'Rope on the New Track	http://nd.fjsen.com/2022-01/27/content_30948733.htm	http://nd.fjsen.com/2022-01/27/content_30948733.htm
Realize green transformation, make "fresh" business cards more beautiful	http://jp.fjsen.com/2022-01/26/content_30948277.htm	http://jp.fjsen.com/2022-01/26/content_30948277.htm
Starting 2022, we will have a good start. We will strive to be at the forefront and work hard in the real world. We will run well in Pingtan and make progress. We will have a good start	http://www.fjsen.com/2022-01/26/content_30947923.htm	http://www.fjsen.com/2022-01/26/content_30947923.htm
Leading technological innovation to establish the "Ningde Landmark" in the global industrial landscape	http://nd.fjsen.com/2022-01/26/content_30947639.htm	http://nd.fjsen.com/2022-01/26/content_30947639.htm
Planning at the forefront, doing practical work, running well in Pingtan, making progress, and achieving a good start	http://ptxw.fjsen.com/2022-01/26/content_30947548.htm	http://ptxw.fjsen.com/2022-01/26/content_30947548.htm
Fujian's "Rice Multi omics Database and Variety Design Application Platform Construction" Passes Expert Group Acceptance	http://fjnews.fjsen.com/2022-12/29/content_31215566.htm	http://fjnews.fjsen.com/2022-12/29/content_31215566.htm
Building a modern pioneer for harmonious coexistence between humans and nature	http://np.fjsen.com/2022-12/28/content_31214857.htm	http://np.fjsen.com/2022-12/28/content_31214857.htm
Building a modern pioneer of harmonious coexistence between humans and nature - Interview with Lin Ruiliang, Secretary of the Nanping Municipal Party Committee	http://fjnews.fjsen.com/2022-12/27/content_31214096.htm	http://fjnews.fjsen.com/2022-12/27/content_31214096.htm
The promotion activity for high-quality development of the marine biopharmaceutical industry in the province was held	http://www.fzccpit.org/2022-12/26/content_31213773.htm	http://www.fzccpit.org/2022-12/26/content_31213773.htm
Fuzhou: Deepen project construction and promote five international brands	http://www.fzccpit.org/2022-12/26/content_31213777.htm	http://www.fzccpit.org/2022-12/26/content_31213777.htm
The China Metallurgical New Materials (Corrosion resistant Steel) Industry Chain Matchmaking Conference was held in Rong	http://zzpd.fjsen.com/2022-12/26/content_31209518.htm	http://zzpd.fjsen.com/2022-12/26/content_31209518.htm
Promote the transformation and upgrading of Quanzhou's petrochemical industry, with members of the Municipal Political Consultative Conference serving as leaders in scientific research	http://qz.fjsen.com/2022-12/26/content_31213651.htm	http://qz.fjsen.com/2022-12/26/content_31213651.htm
Pingshan Review: Adhere to Industry and Seek Development	http://fjnews.fjsen.com/2022-12/23/content_31212101.htm	http://fjnews.fjsen.com/2022-12/23/content_31212101.htm
Quangang: Government, banks, and enterprises connect with real money to alleviate difficulties and provide relief	http://qz.fjsen.com/2022-12/21/content_31210907.htm	http://qz.fjsen.com/2022-12/21/content_31210907.htm
Shaowu was selected as the "Green Mountains and Rivers are Gold and Silver Mountains" practical innovation base	http://fjnews.fjsen.com/2022-12/18/content_31208625.htm	http://fjnews.fjsen.com/2022-12/18/content_31208625.htm
Outlook · Chronicles of Governance | Adhering to Main Business and Strengthening the Real Economy	http://www.fjsen.com/2022-12/17/content_31208595.htm	http://www.fjsen.com/2022-12/17/content_31208595.htm
Creating a full industry chain of "triploid oysters" to help the fishing industry achieve high yields and increase income	http://qz.fjsen.com/2022-12/16/content_31207679.htm	http://qz.fjsen.com/2022-12/16/content_31207679.htm
Fuzhou Jiangyin Port City Economic Zone held emergency drills for sudden environmental accidents	http://fq.fjsen.com/2022-12/16/content_31207811.htm	http://fq.fjsen.com/2022-12/16/content_31207811.htm
Combining Porcelain Art with Zodiac Culture, Dehua Zodiac Porcelain seizes the Rabbit Year Cultural and Creative Market	http://qz.fjsen.com/2022-12/16/content_31207557.htm	http://qz.fjsen.com/2022-12/16/content_31207557.htm
Five companies in Jianyang District received the 2022 Science and Technology Little Giant Enterprise R&D Investment Incentive Fund	http://np.fjsen.com/2022-12/13/content_31205003.htm	http://np.fjsen.com/2022-12/13/content_31205003.htm
Xiamen Jimei: Writing the answer to the era of cross-strait economic and trade integration	http://xm.fjsen.com/2022-12/13/content_31204469.htm	http://xm.fjsen.com/2022-12/13/content_31204469.htm
Shanghang: The Development Change Behind the Beautiful Transcript	http://ly.fjsen.com/2022-12/09/content_31202353.htm	http://ly.fjsen.com/2022-12/09/content_31202353.htm
Two entrepreneurial platforms in Jinjiang have been shortlisted for provincial-level makerspaces	http://qz.fjsen.com/2022-12/09/content_31201723.htm	http://qz.fjsen.com/2022-12/09/content_31201723.htm
Luojiang: Actively cultivating technology giants to drive industrial innovation and upgrading	http://qz.fjsen.com/2022-12/08/content_31200747.htm	http://qz.fjsen.com/2022-12/08/content_31200747.htm
Two spaces in Jinjiang have been shortlisted as provincial-level co creation spaces for the year 2022	http://qz.fjsen.com/2022-12/06/content_31199440.htm	http://qz.fjsen.com/2022-12/06/content_31199440.htm
Promoting incubation, fostering innovation, and building a strong magnetic field for talent aggregation	http://www.fjnjnews.cn/2022-12/06/content_31197428.htm	http://www.fjnjnews.cn/2022-12/06/content_31197428.htm
Jiangyin Port City Economic Zone achieved a total industrial output value of 48.78 billion yuan from January to October, an increase of 22.84% compared to the previous year	http://fq.fjsen.com/2022-12/01/content_31195078.htm	http://fq.fjsen.com/2022-12/01/content_31195078.htm
Leaders from Yunxiao County visit enterprises to promote the spirit of the 20th National Congress of the Communist Party of China	http://zzpd.fjsen.com/2022-11/28/content_31189310.htm	http://zzpd.fjsen.com/2022-11/28/content_31189310.htm
The "Ten Year Development Plan for Higher Education in Fujian Province (2021-2030)" has been issued to support many universities in striving for excellence	http://fjnews.fjsen.com/2022-11/25/content_31189635.htm	http://fjnews.fjsen.com/2022-11/25/content_31189635.htm
Fujian Province adds 10 national level manufacturing industry champions	http://overseas.fjsen.com/2022-11/25/content_31188820.htm	http://overseas.fjsen.com/2022-11/25/content_31188820.htm
The highest international award! Meimei Bridge, undertaken by Fujian Construction Engineering Group's provincial installation company, won the "Outstanding Pedestrian Bridge Award" of the International Bridge and Structural Engineering Association in 2022	http://fjnews.fjsen.com/2022-11/25/content_31188907.htm	http://fjnews.fjsen.com/2022-11/25/content_31188907.htm
Shaowu: Exploring New Paths for the Transformation of "Two Mountains" and Singing "Shaowu is a Good Place"	http://np.fjsen.com/2022-11/24/content_31188287.htm	http://np.fjsen.com/2022-11/24/content_31188287.htm
The world's largest propane propylene separation tower is lifted in Fuqing	http://overseas.fjsen.com/2022-11/22/content_31185690.htm	http://overseas.fjsen.com/2022-11/22/content_31185690.htm
Ten measures in Fujian Province to support the high-quality development of the "China White Dehua Porcelain" industry	http://fjnews.fjsen.com/2022-11/22/content_31185135.htm	http://fjnews.fjsen.com/2022-11/22/content_31185135.htm
Charm Zhangzhou attracts thousands of talents	http://money.fjsen.com/2022-11/21/content_31181875.htm	http://money.fjsen.com/2022-11/21/content_31181875.htm
From spatial reconstruction to industrial upgrading	http://money.fjsen.com/2022-11/21/content_31184282.htm	http://money.fjsen.com/2022-11/21/content_31184282.htm
Shouning: Continuing to strive and writing a new chapter of high-quality development	http://nd.fjsen.com/2022-11/18/content_31182768.htm	http://nd.fjsen.com/2022-11/18/content_31182768.htm
Huian County's' Yongquan 'Action Benefiting Talents Huian' Achieves Significant Results	http://qz.fjsen.com/2022-11/17/content_31181617.htm	http://qz.fjsen.com/2022-11/17/content_31181617.htm
The Provincial Department of Industry and Information Technology and seven other departments jointly issued a document to support the high-quality development of the "China White Dehua Porcelain" industry	http://qz.fjsen.com/2022-11/17/content_31181431.htm	http://qz.fjsen.com/2022-11/17/content_31181431.htm
Industrial Bank Quanzhou Branch: Grasping the Main Melody, Stabilizing the Main Rhythm, Taking the Responsibility of Mainstream Banks, Serving the Practice of Chinese path to modernization in Quanzhou in an All round Way	http://qz.fjsen.com/2022-11/16/content_31180460.htm	http://qz.fjsen.com/2022-11/16/content_31180460.htm
Meixin Technology Meets: 357th IPO Passed This Year, Guojin Securities Passes 19 Orders	http://money.fjsen.com/2022-11/14/content_31177026.htm	http://money.fjsen.com/2022-11/14/content_31177026.htm
Liu Jianyang conducted research in Quanzhou Economic and Technological Development Zone	http://qz.fjsen.com/2022-11/12/content_31177295.htm	http://qz.fjsen.com/2022-11/12/content_31177295.htm
Transforming the industrial depression into a talent depression	http://money.fjsen.com/2022-11/11/content_31176626.htm	http://money.fjsen.com/2022-11/11/content_31176626.htm
Shaowu: Turning industrial depressions into talent depressions	http://overseas.fjsen.com/2022-11/11/content_31176475.htm	http://overseas.fjsen.com/2022-11/11/content_31176475.htm
The first batch of 60 patents in our province were granted open licenses for implementation	http://money.fjsen.com/2022-11/04/content_31170321.htm	http://money.fjsen.com/2022-11/04/content_31170321.htm
Craftsman Li Liang: Still stationed on the production line in his late sixties	http://fjnews.fjsen.com/2022-11/04/content_31170579.htm	http://fjnews.fjsen.com/2022-11/04/content_31170579.htm
2022 Fujian (Jinjiang) Graphene Conference held	http://qz.fjsen.com/2022-11/03/content_31170424.htm	http://qz.fjsen.com/2022-11/03/content_31170424.htm
Quanzhou Chip Valley "looks at" Fujian Intelligent Manufacturing "	http://money.fjsen.com/2022-11/03/content_31169398.htm	http://money.fjsen.com/2022-11/03/content_31169398.htm
Yanping Thermal Insulation Blows the Horn of Further Development and Growth	http://np.fjsen.com/2022-11/03/content_31169614.htm	http://np.fjsen.com/2022-11/03/content_31169614.htm
The first batch of 60 patents in Fujian Province were granted open licenses for implementation	http://fjnews.fjsen.com/2022-11/03/content_31169501.htm	http://fjnews.fjsen.com/2022-11/03/content_31169501.htm
Fujian releases first batch of 60 patents for open licensing and achieves first patent open licensing transaction	http://www.fjsen.com/zhuanti/2022-11/02/content_31169149.htm	http://www.fjsen.com/zhuanti/2022-11/02/content_31169149.htm
Zhuzhou, Hunan integrates technology, market, and management resources, cultivates specialized, refined, and innovative "little giant" enterprises, and drives upgrading of 58 leading enterprises (stimulating the emergence of more specialized, refined, innovative, and small and medium-sized enterprises)	http://www.fjsen.com/2022-11/02/content_31168922.htm	http://www.fjsen.com/2022-11/02/content_31168922.htm
Quanzhou private enterprises accelerate technology integration with scientific research institutions	http://qz.fjsen.com/2022-10/31/content_31166874.htm	http://qz.fjsen.com/2022-10/31/content_31166874.htm
Fujian Provincial Emergency Management Department and ZTE Corporation signed a strategic cooperation framework agreement	http://www.fjsen.com/zhuanti/2022-10/29/content_31166040.htm	http://www.fjsen.com/zhuanti/2022-10/29/content_31166040.htm
Jingyang Town: Empowering the Industry with Butterfly Transformation and Upgrading through 'Changing Cages for Birds'	http://fq.fjsen.com/2022-10/25/content_31162683.htm	http://fq.fjsen.com/2022-10/25/content_31162683.htm
Provincial hospitals work together to open up the "expressway" for the transformation of scientific and technological achievements	http://fjnews.fjsen.com/2022-10/22/content_31160507.htm	http://fjnews.fjsen.com/2022-10/22/content_31160507.htm
Decoding the Strength of 'Xiamen Construction'	http://xm.fjsen.com/2022-10/21/content_31159654.htm	http://xm.fjsen.com/2022-10/21/content_31159654.htm
Wuping's new display industry sets sail for a long time	http://overseas.fjsen.com/2022-10/19/content_31157818.htm	http://overseas.fjsen.com/2022-10/19/content_31157818.htm
Wuping's new display industry sets sail - Fujian Daily Digital Report	http://money.fjsen.com/2022-10/19/content_31157864.htm	http://money.fjsen.com/2022-10/19/content_31157864.htm
The Yanping insulation industry chain is constantly expanding	http://np.fjsen.com/2022-10/19/content_31157158.htm	http://np.fjsen.com/2022-10/19/content_31157158.htm
Progress · I am at the construction site | Quangang: Key project construction is in full swing	http://fjnews.fjsen.com/2022-10/19/content_31157552.htm	http://fjnews.fjsen.com/2022-10/19/content_31157552.htm
Celebrating the 20th National Congress | Fujian: Doing a Good Job in Education, Moral Education, and Talent Cultivation	http://fjnews.fjsen.com/2022-10/15/content_31154905.htm	http://fjnews.fjsen.com/2022-10/15/content_31154905.htm
The research team of the Standing Committee of the Fujian Provincial People's Congress visited Nanjing for research	http://nd.fjsen.com/2022-10/14/content_31154384.htm	http://nd.fjsen.com/2022-10/14/content_31154384.htm
Huangmei County, Hubei Province: Building a Talent Foundation for Achieving Common Prosperity at the Grassroots Level	http://www.fjsen.com/2022-10/13/content_31153809.htm	http://www.fjsen.com/2022-10/13/content_31153809.htm
Quanzhou Taiwan Business Investment Zone: Extraordinary Ten Year Endeavor New Area	http://qz.fjsen.com/2022-10/13/content_31153116.htm	http://qz.fjsen.com/2022-10/13/content_31153116.htm
Xiamen Haicang: bravely standing at the forefront of the tide, striving for priority, changing the face of the ever-changing world	http://wmf.fjsen.com/2022-10/13/content_31153100.htm	http://wmf.fjsen.com/2022-10/13/content_31153100.htm
Xiamen Haicang: Industrial Zone Strides towards International First Class Bay Area	http://wmf.fjsen.com/2022-10/13/content_31153113.htm	http://wmf.fjsen.com/2022-10/13/content_31153113.htm
Zhangzhou Xiangcheng: Creating a High Quality Central Urban Area	http://house.fjsen.com/2022-10/12/content_31152156.htm	http://house.fjsen.com/2022-10/12/content_31152156.htm
Shaowu implements the "Talent Gathering Shaowu" talent strategy action	http://np.fjsen.com/2022-10/09/content_31148722.htm	http://np.fjsen.com/2022-10/09/content_31148722.htm
Two industrial colleges have settled in Zhangzhou Vocational and Technical College	http://zzpd.fjsen.com/2022-10/08/content_31148116.htm	http://zzpd.fjsen.com/2022-10/08/content_31148116.htm
Ten years of transformation into a 'new city'	http://sm.fjsen.com/2022-10/08/content_31147807.htm	http://sm.fjsen.com/2022-10/08/content_31147807.htm
Dongfu Research Institute releases the first batch of major scientific and technological research projects for "unveiling the list and leading the way"	http://fjnews.fjsen.com/2022-10/07/content_31147366.htm	http://fjnews.fjsen.com/2022-10/07/content_31147366.htm
New Chapter of the Pearl River Tide Spectrum	http://www.fjsen.com/2022-10/06/content_31147126.htm	http://www.fjsen.com/2022-10/06/content_31147126.htm
Look at China | New Chapter of the Pearl River Tide Spectrum	http://www.fjsen.com/2022-10/06/content_31147118.htm	http://www.fjsen.com/2022-10/06/content_31147118.htm
Shouning: Ten Years of Striving to Write a New Chapter of High Quality Development	http://nd.fjsen.com/2022-10/02/content_31146864.htm	http://nd.fjsen.com/2022-10/02/content_31146864.htm
Fuqing City: Accurately activating the "talent engine" to lead the industry to "accumulate momentum and take off"	http://jx.fjsen.com/2022-10/01/content_31144105.htm	http://jx.fjsen.com/2022-10/01/content_31144105.htm
The first batch of pilot projects for incremental distribution business reform in China, Shenghua Substation in Jiangyin Industrial Park, has been completed and put into operation	http://fjnews.fjsen.com/2022-09/30/content_31145419.htm	http://fjnews.fjsen.com/2022-09/30/content_31145419.htm
Fujian Expressway: Exploring and Innovating Services to Benefit the People, Writing a Decade of High Quality Development Chapter	http://travel.fjsen.com/2022-09/30/content_31145290.htm	http://travel.fjsen.com/2022-09/30/content_31145290.htm
Minhou: Ten years of hard work and pursuit of dreams, setting sail again today	http://www.518fuzhou.com/2022-09/30/content_31145171.htm	http://www.518fuzhou.com/2022-09/30/content_31145171.htm
The "golden signboard" helps enterprises speed up and shift gears. Seven enterprises in Fuqing have passed the customs AEO advanced certification	http://fq.fjsen.com/2022-09/28/content_31143091.htm	http://fq.fjsen.com/2022-09/28/content_31143091.htm
Quanzhou Taiwan Business Investment Zone's "Qinqing Jiayuan" platform launches new supervision module	http://qz.fjsen.com/2022-09/27/content_31141693.htm	http://qz.fjsen.com/2022-09/27/content_31141693.htm
Specialized integration of rare earth industry accelerates	http://money.fjsen.com/2022-09/26/content_31141069.htm	http://money.fjsen.com/2022-09/26/content_31141069.htm
Quanzhou Taiwan Business Investment Zone: Pro Qing and proactive, dedicated to building the 'first home'	http://fjnews.fjsen.com/2022-09/25/content_31140298.htm	http://fjnews.fjsen.com/2022-09/25/content_31140298.htm
Two entrepreneurs from Sanming were awarded the title of "National Excellent Entrepreneurs"	http://sm.fjsen.com/2022-09/25/content_31140300.htm	http://sm.fjsen.com/2022-09/25/content_31140300.htm
Hongye Foundation Meeting: 312nd IPO approved this year, China Merchants Securities has passed 9 orders	http://money.fjsen.com/2022-09/23/content_31139738.htm	http://money.fjsen.com/2022-09/23/content_31139738.htm
Fuzhou High tech Zone Promotes Normalization of 'Ten Thousand Cadres Going to Grassroots'	http://fz.fjsen.com/2022-09/23/content_31139070.htm	http://fz.fjsen.com/2022-09/23/content_31139070.htm
International Composite Materials Conference: 310th Open Source Securities to Pass IPO This Year	http://money.fjsen.com/2022-09/22/content_31138736.htm	http://money.fjsen.com/2022-09/22/content_31138736.htm
The project construction is fully operational, and the economic development is full of momentum	http://np.fjsen.com/2022-09/22/content_31138018.htm	http://np.fjsen.com/2022-09/22/content_31138018.htm
Meet at the Asia Europe Expo to share new opportunities on the Silk Road	http://www.fjsen.com/2022-09/20/content_31135925.htm	http://www.fjsen.com/2022-09/20/content_31135925.htm
Sanming accelerates technological transformation to promote capital increase and production expansion	http://sm.fjsen.com/2022-09/19/content_31134715.htm	http://sm.fjsen.com/2022-09/19/content_31134715.htm
Four companies from Fujian Province will be listed as National Technology Innovation Demonstration Enterprises in 2022	http://xm.fjsen.com/2022-09/17/content_31134228.htm	http://xm.fjsen.com/2022-09/17/content_31134228.htm
Original intention remains unchanged, writing a new chapter in the old district	http://fjnews.fjsen.com/2022-09/16/content_31132844.htm	http://fjnews.fjsen.com/2022-09/16/content_31132844.htm
The series of activities for the 2022 National Innovation and Entrepreneurship Week Fujian Branch were launched at Fuzhou Software Park	http://fjnews.fjsen.com/2022-09/15/content_31132769.htm	http://fjnews.fjsen.com/2022-09/15/content_31132769.htm
From the Fields to the World: A Documentary of the Political Consultative Conference in Jin'an District, Fuzhou City, Fujian Province's Efforts to Accelerate the Construction of the Science and Technology Innovation Corridor	http://fz.fjsen.com/2022-09/15/content_31132443.htm	http://fz.fjsen.com/2022-09/15/content_31132443.htm
Our province has launched an industrial enterprise supply and demand docking platform	http://money.fjsen.com/2022-09/14/content_31131152.htm	http://money.fjsen.com/2022-09/14/content_31131152.htm
Fragrance wafts all over the world, vinegar enters thousands of households, porcelain is famous both domestically and internationally	http://money.fjsen.com/2022-09/13/content_31130256.htm	http://money.fjsen.com/2022-09/13/content_31130256.htm
Yongchun: Fragrance wafts across the seas, vinegar enters thousands of households, porcelain is famous both domestically and internationally	http://fjnews.fjsen.com/2022-09/13/content_31129770.htm	http://fjnews.fjsen.com/2022-09/13/content_31129770.htm
Focus Interview: Leading the Light of Chinese Civilization to Illuminate the Road to Revitalization	http://www.fjsen.com/2022-09/12/content_31129601.htm	http://www.fjsen.com/2022-09/12/content_31129601.htm
Jianghan New Materials Meets: 295th IPO Passed This Year, CITIC Securities Passes 39.5 Orders	http://money.fjsen.com/2022-09/09/content_31128687.htm	http://money.fjsen.com/2022-09/09/content_31128687.htm
Changle: Brave at the forefront of the tide, daring to step on the waves and pursue dreams, building a new city	http://cl.fjsen.com/2022-09/09/content_31127323.htm	http://cl.fjsen.com/2022-09/09/content_31127323.htm
Blue Arrow Electronics Meeting: 292nd Jinyuan Securities Passes First Order of IPO This Year	http://money.fjsen.com/2022-09/09/content_31127494.htm	http://money.fjsen.com/2022-09/09/content_31127494.htm
Minhou: Three cities complement each other, the first city strides forward with great strides	http://fz.fjsen.com/2022-09/09/content_31128014.htm	http://fz.fjsen.com/2022-09/09/content_31128014.htm
Choose Fuzhou for the project and listen to what customers have to say	http://fz.fjsen.com/2022-09/09/content_31128017.htm	http://fz.fjsen.com/2022-09/09/content_31128017.htm
Enhancing energy level and integrating into the world - Fuqing continues to promote reform and opening up, achieving new results	http://fq.fjsen.com/2022-09/08/content_31127658.htm	http://fq.fjsen.com/2022-09/08/content_31127658.htm
Minqing Taxation: Additional deduction of research and development expenses helps enterprises develop faster and more steadily	http://www.fjsen.com/content/2022-09/08/content_31127669.htm	http://www.fjsen.com/content/2022-09/08/content_31127669.htm
Fujian Province adds two provincial-level manufacturing innovation centers	http://overseas.fjsen.com/2022-09/07/content_31126073.htm	http://overseas.fjsen.com/2022-09/07/content_31126073.htm
Pursuing Dreams, Deep Blue, Towards the Sea, Prosperous, Fuqing's Billion Dollar Industrial Cluster Sails to Sail	http://fq.fjsen.com/2022-09/06/content_31125276.htm	http://fq.fjsen.com/2022-09/06/content_31125276.htm
The first provincial-level manufacturing innovation center in Nanping City has been recognized	http://np.fjsen.com/2022-09/06/content_31124879.htm	http://np.fjsen.com/2022-09/06/content_31124879.htm
Liu Peifang: The 'Guardian Angel' of Rongcheng Workers	http://fz.fjsen.com/2022-09/05/content_31123687.htm	http://fz.fjsen.com/2022-09/05/content_31123687.htm
Yunxiao County Party Secretary investigates the work of stabilizing growth in industrial enterprises	http://zzpd.fjsen.com/2022-09/01/content_31120954.htm	http://zzpd.fjsen.com/2022-09/01/content_31120954.htm
Leading Innovation with Constant Strength at the Top - Observation of Half Year Reports of Several Quanzhou Industry Leading Listed Companies	http://fjnews.fjsen.com/2022-09/01/content_31121231.htm	http://fjnews.fjsen.com/2022-09/01/content_31121231.htm
Xiamen University Science and Technology Park (Fuqing) Science and Technology Innovation Center Press the "Acceleration Button"	http://fq.fjsen.com/2022-08/31/content_31119687.htm	http://fq.fjsen.com/2022-08/31/content_31119687.htm
The 7th BRICS Young Scientists Forum was held in Xiamen	http://xm.fjsen.com/2022-08/30/content_31119801.htm	http://xm.fjsen.com/2022-08/30/content_31119801.htm
Inspire the potential of young people and jointly build the future of BRICS	http://overseas.fjsen.com/2022-08/30/content_31119494.htm	http://overseas.fjsen.com/2022-08/30/content_31119494.htm
Drawing on the experience of Jinjiang to promote the construction of high-quality development demonstration zones in the revolutionary old areas of Sanming	http://sm.fjsen.com/2022-08/28/content_31118233.htm	http://sm.fjsen.com/2022-08/28/content_31118233.htm
The investment promotion meeting of the Sanming Municipal Political Consultative Conference system has achieved results	http://sm.fjsen.com/2022-08/28/content_31118232.htm	http://sm.fjsen.com/2022-08/28/content_31118232.htm
Jinjiang: Promoting High Quality Development through High Efficiency Projects	http://qz.fjsen.com/2022-08/26/content_31117452.htm	http://qz.fjsen.com/2022-08/26/content_31117452.htm
Fujian: Polishing the 'Golden Brand' of the Science and Technology Special Mission	http://wmf.fjsen.com/2022-08/26/content_31117314.htm	http://wmf.fjsen.com/2022-08/26/content_31117314.htm
Licheng is 20 years old and in the prime of his youth	http://fjnews.fjsen.com/2022-08/24/content_31115609.htm	http://fjnews.fjsen.com/2022-08/24/content_31115609.htm
Putian: Setting Sail towards the Sea to Strengthen Xiuyu Island	http://fjnews.fjsen.com/2022-08/24/content_31115579.htm	http://fjnews.fjsen.com/2022-08/24/content_31115579.htm
Green development, ecological landscape painting in Nanping	http://np.fjsen.com/2022-08/23/content_31114537.htm	http://np.fjsen.com/2022-08/23/content_31114537.htm
[Min Shan Min Shui Wu Hua Xin · Extraordinary Decade] Green Development Ecological Nanping Painting Scenic Spot	http://fjnews.fjsen.com/2022-08/23/content_31114458.htm	http://fjnews.fjsen.com/2022-08/23/content_31114458.htm
Development of Ningde Stainless Steel Industry - Persisting in Innovation and Not Relaxing	http://fjnews.fjsen.com/2022-08/22/content_31113564.htm	http://fjnews.fjsen.com/2022-08/22/content_31113564.htm
Xiamen enterprises frequently attract billions of yuan in financing	http://xm.fjsen.com/2022-08/22/content_31113512.htm	http://xm.fjsen.com/2022-08/22/content_31113512.htm
The First Summit Forum on Optoelectronic Fusion Innovation and Development and the Final of the 5th "Chuangxiang Fujian" Optoelectronic Special Competition were held	http://fjnews.fjsen.com/2022-08/21/content_31113047.htm	http://fjnews.fjsen.com/2022-08/21/content_31113047.htm
A pool of flowing water brings spring	http://np.fjsen.com/2022-08/21/content_31113323.htm	http://np.fjsen.com/2022-08/21/content_31113323.htm
Fuzhou: The "Four Major Economies" Lead Development Together	http://fz.fjsen.com/2022-08/20/content_31113128.htm	http://fz.fjsen.com/2022-08/20/content_31113128.htm
Nanping: Yuanxiang New Materials listed on the Growth Enterprise Market of the Shenzhen Stock Exchange	http://np.fjsen.com/2022-08/20/content_31113076.htm	http://np.fjsen.com/2022-08/20/content_31113076.htm
Three people from Xiamen were awarded the title of "Most Beautiful Science and Technology Commissioner" by the province	http://xm.fjsen.com/2022-08/19/content_31113057.htm	http://xm.fjsen.com/2022-08/19/content_31113057.htm
Jinjiang: Inheriting and Promoting the 'Jinjiang Experience', Continuing to Lead the Way with the Flag	http://qz.fjsen.com/2022-08/19/content_31112819.htm	http://qz.fjsen.com/2022-08/19/content_31112819.htm
Promoting the 'Jinjiang Experience' and Writing a New Chapter in the Era	http://www.fjsen.com/r/2022-08/19/content_31112544.htm	http://www.fjsen.com/r/2022-08/19/content_31112544.htm
The General Office of the Fujian Provincial Committee of the Communist Party of China and the General Office of the Fujian Provincial People's Government have issued the "Several Measures to Promote Innovative Development of the Private Economy"	http://fjnews.fjsen.com/2022-08/19/content_31112462.htm	http://fjnews.fjsen.com/2022-08/19/content_31112462.htm
Focusing on the bullseye and exerting precise force - Rongqiao Development Zone strives to accelerate and increase efficiency in key project construction	http://fq.fjsen.com/2022-08/18/content_31111778.htm	http://fq.fjsen.com/2022-08/18/content_31111778.htm
Cross plateau collaboration: the cross-border integration of traditional crafts from Fujian and Tibet opens up new flowers	http://fjnews.fjsen.com/2022-08/18/content_31111777.htm	http://fjnews.fjsen.com/2022-08/18/content_31111777.htm
Overview of Sanming Project Construction Promoting High Quality Development	http://sm.fjsen.com/2022-08/18/content_31111537.htm	http://sm.fjsen.com/2022-08/18/content_31111537.htm
Quanzhou City's 2022 Major Project Video Connection Launch Event Held	http://fjnews.fjsen.com/2022-08/18/content_31111288.htm	http://fjnews.fjsen.com/2022-08/18/content_31111288.htm
ICBC Nanping Branch provides financial support for the development of specialized, refined, and innovative enterprises	http://np.fjsen.com/2022-08/17/content_31110836.htm	http://np.fjsen.com/2022-08/17/content_31110836.htm
The First International Stainless Steel Industry Innovation and Development Conference was held in Ningde	http://money.fjsen.com/2022-08/17/content_31110450.htm	http://money.fjsen.com/2022-08/17/content_31110450.htm
Quanzhou: Smart 'Benefiting' the Real Economy - Fujian Daily Digital Report	http://money.fjsen.com/2022-08/17/content_31110460.htm	http://money.fjsen.com/2022-08/17/content_31110460.htm
The First International Stainless Steel Industry Innovation and Development Conference was held	http://nd.fjsen.com/2022-08/17/content_31110383.htm	http://nd.fjsen.com/2022-08/17/content_31110383.htm
Quanzhou: Smart 'Benefiting' the Real Economy	http://fjnews.fjsen.com/2022-08/17/content_31110234.htm	http://fjnews.fjsen.com/2022-08/17/content_31110234.htm
Economic Daily Full Page Focus: How the 'Jinjiang Experience' Lasts Longer	http://fjnews.fjsen.com/2022-08/16/content_31109607.htm	http://fjnews.fjsen.com/2022-08/16/content_31109607.htm
Multiple Xiamen enterprises increase capital, expand production and seek development	http://xm.fjsen.com/2022-08/16/content_31109038.htm	http://xm.fjsen.com/2022-08/16/content_31109038.htm
Sanming: Building a green foundation, painting a new picture of high-quality development	http://sm.fjsen.com/2022-08/15/content_31108704.htm	http://sm.fjsen.com/2022-08/15/content_31108704.htm
Fujian: Innovation driven digital empowerment helps promote high-quality development of private economy	http://www.fjsen.com/2022-08/15/content_31108613.htm	http://www.fjsen.com/2022-08/15/content_31108613.htm
CCTV CCTV News Focuses on Fujian: Innovation Driven Digital Empowerment Helps High Quality Development of Private Economy	http://www.518fuzhou.com/2022-08/15/content_31108475.htm	http://www.518fuzhou.com/2022-08/15/content_31108475.htm
Ningde: Strengthening Stainless Steel and Building an Industrial City	http://nd.fjsen.com/2022-08/15/content_31114769.htm	http://nd.fjsen.com/2022-08/15/content_31114769.htm
Overview of the Development of Zhangzhou's Marine Economy since the 18th National Congress of the Communist Party of China	http://zzpd.fjsen.com/2022-08/15/content_31108329.htm	http://zzpd.fjsen.com/2022-08/15/content_31108329.htm
City leaders conduct research at the grassroots level	http://sm.fjsen.com/2022-08/13/content_31107685.htm	http://sm.fjsen.com/2022-08/13/content_31107685.htm
Ecological priority and green development: Liu Jianyang conducts research in Quangang District	http://qz.fjsen.com/2022-08/12/content_31106882.htm	http://qz.fjsen.com/2022-08/12/content_31106882.htm
The centralized interview activity for inheriting and promoting the "Jinjiang experience" has been launched in Jinjiang	http://fjnews.fjsen.com/2022-08/11/content_31107963.htm	http://fjnews.fjsen.com/2022-08/11/content_31107963.htm
Fuzhou Fuqing: Striving to Build a Modern and International Seaside Landscape City	http://fq.fjsen.com/2022-08/11/content_31106160.htm	http://fq.fjsen.com/2022-08/11/content_31106160.htm
Firmly confident, stable development, full of enthusiasm, and brave struggle - a hot topic among all sectors of society on the economic conference of Fuqing City in the first half of the year	http://fq.fjsen.com/2022-08/10/content_31105177.htm	http://fq.fjsen.com/2022-08/10/content_31105177.htm
Playing a good combination of punches to help stabilize growth, Fuqing's GDP growth rate ranked first in Fuzhou in the first half of the year, and its economic development is stable and improving	http://fq.fjsen.com/2022-08/08/content_31103437.htm	http://fq.fjsen.com/2022-08/08/content_31103437.htm
Changle: Creating a favorable business environment and allowing the flower of the digital industry to bloom brilliantly	http://cl.fjsen.com/2022-08/08/content_31103169.htm	http://cl.fjsen.com/2022-08/08/content_31103169.htm
Deeply cultivating the blue ocean and striving for strength towards the sea - Ningde City vigorously develops the marine economy	http://nd.fjsen.com/2022-08/07/content_31103067.htm	http://nd.fjsen.com/2022-08/07/content_31103067.htm
Ningxia in the past decade: Jiangnan on the Great Wall is getting better and better	http://www.fjsen.com/2022-08/06/content_31102413.htm	http://www.fjsen.com/2022-08/06/content_31102413.htm
'Small building materials' achieve' big industry '. Yatong Company insists on independent innovation, from producing only PVC drainage pipes to achieving full ecological product coverage	http://fq.fjsen.com/2022-08/05/content_31101923.htm	http://fq.fjsen.com/2022-08/05/content_31101923.htm
Introducing a leader to bring out a chain and form an industrial "chain" to develop and activate the "fusion" effect	http://fq.fjsen.com/2022-08/04/content_31100956.htm	http://fq.fjsen.com/2022-08/04/content_31100956.htm
Gu Lei: Entering a new stage of fission development	http://fjnews.fjsen.com/2022-08/04/content_31100651.htm	http://fjnews.fjsen.com/2022-08/04/content_31100651.htm
Binhai New City opens up a new pattern of industrial development	http://fz.fjsen.com/2022-08/03/content_31100185.htm	http://fz.fjsen.com/2022-08/03/content_31100185.htm
Fuzhou on the sea, the blue engine is more powerful	http://www.fzccpit.org/2022-08/03/content_31100029.htm	http://www.fzccpit.org/2022-08/03/content_31100029.htm
Ten projects won awards at the 23rd China Patent Awards in Xiamen	http://xm.fjsen.com/2022-07/31/content_31097215.htm	http://xm.fjsen.com/2022-07/31/content_31097215.htm
The basic medical insurance unit payment regulations for phased employees have been introduced, and the "exemption and enjoyment" deferred payment policy for small and medium-sized enterprises has been implemented	http://fq.fjsen.com/2022-07/29/content_31096480.htm	http://fq.fjsen.com/2022-07/29/content_31096480.htm
Financial Water Helps Enterprises Relieve Difficulties. This year, Fuqing City has added over 22 billion yuan in new corporate loans	http://fq.fjsen.com/2022-07/29/content_31096476.htm	http://fq.fjsen.com/2022-07/29/content_31096476.htm
State Grid Pingtan Power Supply Company: "Electric Second Class" Helps Accelerate Project Construction	http://ptxw.fjsen.com/2022-07/27/content_31094939.htm	http://ptxw.fjsen.com/2022-07/27/content_31094939.htm
Fujian Emergency Technology Center conducts safety production standardization review at Fujian Shenyuan New Materials Co., Ltd	http://www.fjsen.com/zhuanti/2022-07/27/content_31097995.htm	http://www.fjsen.com/zhuanti/2022-07/27/content_31097995.htm
The added value of the digital economy in Longyan City has exceeded 100 billion yuan	http://ly.fjsen.com/2022-07/25/content_31098437.htm	http://ly.fjsen.com/2022-07/25/content_31098437.htm
Quanzhou launches special action of '10000 cadres entering 10000 enterprises, one enterprise, one strategy promoting development'	http://qz.fjsen.com/2022-07/25/content_31092143.htm	http://qz.fjsen.com/2022-07/25/content_31092143.htm
Yin Li and Zhao Long had a discussion with guests attending the Digital Summit: Promoting pragmatic cooperation to achieve mutual benefit and win-win results	http://overseas.fjsen.com/2022-07/24/content_31093251.htm	http://overseas.fjsen.com/2022-07/24/content_31093251.htm
Quangang: Door to door entry to enterprises, providing assistance and leading services to promote production	http://qz.fjsen.com/2022-07/22/content_31091247.htm	http://qz.fjsen.com/2022-07/22/content_31091247.htm
Xiangcheng holds an international (Zhangzhou, Fujian) conference on metallurgical new materials industry	http://zzpd.fjsen.com/2022-07/22/content_31090556.htm	http://zzpd.fjsen.com/2022-07/22/content_31090556.htm
Apply new technology to put on a 'lightweight new outfit' for Jinjiang Bridge	http://qz.fjsen.com/2022-07/22/content_31091102.htm	http://qz.fjsen.com/2022-07/22/content_31091102.htm
Fuqing City continuously deepens the integration of industry and education to support high-quality development of enterprises	http://fq.fjsen.com/2022-07/21/content_31089851.htm	http://fq.fjsen.com/2022-07/21/content_31089851.htm
The "Guling Science and Technology Innovation Conference" Brand Launch Event and the 5th "Chuangxiang Fujian" Small and Medium sized Enterprise Innovation and Entrepreneurship Competition Optoelectronic Special Competition Launch	http://fz.fjsen.com/2022-07/21/content_31089704.htm	http://fz.fjsen.com/2022-07/21/content_31089704.htm
Nan'an: Empowering Butterfly with Intelligent Manufacturing to Transform into Strong Industry, Prosperous City, and Breakthrough Path	http://qz.fjsen.com/2022-07/20/content_31088384.htm	http://qz.fjsen.com/2022-07/20/content_31088384.htm
'Xiu' Beautiful Port City and 'Yu' Have Glory - The 20-year Development Mark of Xiuyu District, Putian City	http://fjnews.fjsen.com/2022-07/20/content_31088573.htm	http://fjnews.fjsen.com/2022-07/20/content_31088573.htm
Fujian enterprises accelerate their listing process	http://fjnews.fjsen.com/2022-07/20/content_31088405.htm	http://fjnews.fjsen.com/2022-07/20/content_31088405.htm
Dr. Fu from Fudan University Enters Enterprises to Promote Chemical Industry University Research Cooperation	http://fz.fjsen.com/2022-07/18/content_31086610.htm	http://fz.fjsen.com/2022-07/18/content_31086610.htm
Immediate action "leads Fuzhou to run fast all the way	http://fjnews.fjsen.com/2022-07/18/content_31086517.htm	http://fjnews.fjsen.com/2022-07/18/content_31086517.htm
Writing the 'Putian Sample' of Ecological Civilization Construction	http://fjnews.fjsen.com/2022-07/16/content_31085887.htm	http://fjnews.fjsen.com/2022-07/16/content_31085887.htm
Quangang: Let the vitality of high-quality development surge vigorously	http://qz.fjsen.com/2022-07/14/content_31084951.htm	http://qz.fjsen.com/2022-07/14/content_31084951.htm
Sanming, an old district, deepens reform and revitalizes its appearance	http://sm.fjsen.com/2022-07/14/content_31084119.htm	http://sm.fjsen.com/2022-07/14/content_31084119.htm
The high-end polyamide series project has been signed and landed, with a total investment of approximately 23.2 billion yuan by Gulei	http://fjnews.fjsen.com/2022-07/14/content_31083910.htm	http://fjnews.fjsen.com/2022-07/14/content_31083910.htm
Gulei signs 23.2 billion yuan project to develop high-end polyamide industry chain	http://zzpd.fjsen.com/2022-07/14/content_31083892.htm	http://zzpd.fjsen.com/2022-07/14/content_31083892.htm
600000 tons/year Quanzhou adds a major project to strengthen and supplement the petrochemical industry chain	http://qz.fjsen.com/2022-07/13/content_31083856.htm	http://qz.fjsen.com/2022-07/13/content_31083856.htm
Jinjiang actively builds a new development pattern for fire safety	http://fjnews.fjsen.com/2022-07/12/content_31082274.htm	http://fjnews.fjsen.com/2022-07/12/content_31082274.htm
Building the world's largest adhesive tape production base, Friendship Group expects sales to increase by 30% year-on-year in the first half of the year, achieving "double over half"	http://fq.fjsen.com/2022-07/11/content_31081806.htm	http://fq.fjsen.com/2022-07/11/content_31081806.htm
Excerpts from the speech of entrepreneurs at the symposium commemorating the 20th anniversary of the introduction of the "Jinjiang Experience"	http://fjnews.fjsen.com/2022-07/09/content_31080791.htm	http://fjnews.fjsen.com/2022-07/09/content_31080791.htm
Shouning County adheres to ecological priority and embarks on a path of green development	http://nd.fjsen.com/2022-07/08/content_31080351.htm	http://nd.fjsen.com/2022-07/08/content_31080351.htm
Ningde Shouning: Green Practice of "Natural Oxygen Bar"	http://ndwm.fjsen.com/2022-07/08/content_31082557.htm	http://ndwm.fjsen.com/2022-07/08/content_31082557.htm
We cannot be the only one and become the market leader. Quanzhou private enterprises aim to create an industry 'invisible champion'	http://qz.fjsen.com/2022-07/08/content_31080157.htm	http://qz.fjsen.com/2022-07/08/content_31080157.htm
Moving forward with waves and opening up a new chapter - Fuzhou coordinates epidemic prevention and control with economic and social development, accelerates the construction of a modern international city documentary	http://www.fzccpit.org/2022-07/07/content_31079250.htm	http://www.fzccpit.org/2022-07/07/content_31079250.htm
From a three foot podium to a thousand miles of fertile soil	http://taihai.fjsen.com/2022-07/06/content_31078122.htm	http://taihai.fjsen.com/2022-07/06/content_31078122.htm
Provincial collection of scientific and technological achievements in epidemic prevention and control begins	http://fjnews.fjsen.com/2022-07/05/content_31077136.htm	http://fjnews.fjsen.com/2022-07/05/content_31077136.htm
A special loan of 5 billion yuan has benefited 1120 small and medium-sized manufacturing enterprises	http://fjnews.fjsen.com/2022-07/05/content_31077051.htm	http://fjnews.fjsen.com/2022-07/05/content_31077051.htm
The first batch of provincial-level modern industry college construction projects have been determined	http://fjnews.fjsen.com/2022-07/04/content_31076118.htm	http://fjnews.fjsen.com/2022-07/04/content_31076118.htm
Hot Interpretation | Xi Jinping's Treasure of Hong Kong from These 'Centers'	http://www.fjsen.com/2022-07/03/content_31075809.htm	http://www.fjsen.com/2022-07/03/content_31075809.htm
Huian: Strengthening the 'safety belt' for the development of industry and city	http://www.fjsen.com/zhuanti/2022-07/01/content_31074895.htm	http://www.fjsen.com/zhuanti/2022-07/01/content_31074895.htm
Continuing the red gene and promoting green development	http://ly.fjsen.com/2022-07/01/content_31076313.htm	http://ly.fjsen.com/2022-07/01/content_31076313.htm
Zhangzhou introduces ten measures to promote high-quality development of the flower and seedling industry	http://fjnews.fjsen.com/2022-06/30/content_31073489.htm	http://fjnews.fjsen.com/2022-06/30/content_31073489.htm
Xingye Asset Management actively serves the high-quality development of local economy	http://fjnews.fjsen.com/2022-06/30/content_31073472.htm	http://fjnews.fjsen.com/2022-06/30/content_31073472.htm
Fujian's 5 billion yuan special loan benefits 1120 small and medium-sized manufacturing enterprises	http://fjnews.fjsen.com/2022-06/28/content_31071709.htm	http://fjnews.fjsen.com/2022-06/28/content_31071709.htm
The "Hand in Hand" Matchmaking Conference for Functional Chemical Fiber New Materials in Fujian Province was held in Quan	http://qz.fjsen.com/2022-06/27/content_31070893.htm	http://qz.fjsen.com/2022-06/27/content_31070893.htm
Xiamen: 26 provincial and municipal skill master studios awarded licenses	http://xm.fjsen.com/2022-06/24/content_31069249.htm	http://xm.fjsen.com/2022-06/24/content_31069249.htm
The Digital Empowerment Industry Summit Forum was held, with Fuzhou's digital economy ranking first in Fujian in terms of scale	http://fz.fjsen.com/2022-06/22/content_31067129.htm	http://fz.fjsen.com/2022-06/22/content_31067129.htm
20 Years of Hai Chuang Hui: Being a 'Red Queen' for Over 50000 Achievements	http://www.fjsen.com/zhuanti/2022-06/21/content_31067394.htm	http://www.fjsen.com/zhuanti/2022-06/21/content_31067394.htm
Fuzhou Economic and Technological Development Zone Tax Bureau visits to promote and prepare for the implementation of the Stamp Tax Law	http://www.fjsen.com/content/2022-06/21/content_31066663.htm	http://www.fjsen.com/content/2022-06/21/content_31066663.htm
Speech by Fu Chaoyang at the Investment Promotion Project Symposium in Putian City	http://pt.fjsen.com/xw/2022-06/21/content_31066493.htm	http://pt.fjsen.com/xw/2022-06/21/content_31066493.htm
The 20th Hai Chuang Fair has concluded, with a signing amount of over 270 billion yuan. Technology illuminates the light of Fuzhou's industry	http://www.518fuzhou.com/2022-06/21/content_31066375.htm	http://www.518fuzhou.com/2022-06/21/content_31066375.htm
The Fuzhou Fujian Merchants Investment Promotion Conference was held with overseas Chinese as bridges and merchants as merchants	http://fz.fjsen.com/2022-06/20/content_31065042.htm	http://fz.fjsen.com/2022-06/20/content_31065042.htm
Yuda Environmental Protection: Overcoming Difficulties and Writing 'Dare to Fight, Win'	http://www.fjsen.com/zhuanti/2022-06/19/content_31064825.htm	http://www.fjsen.com/zhuanti/2022-06/19/content_31064825.htm
Focus Interview | Seeing the New Appearance of the Old Area Reflecting the Original Aspiration and Mission	http://www.fjsen.com/2022-06/19/content_31064772.htm	http://www.fjsen.com/2022-06/19/content_31064772.htm
The 20th Hai Chuang Hui held in Fuzhou, showcasing cool "black technology" through journalist check-in	http://www.fjsen.com/zhuanti/2022-06/19/content_31064645.htm	http://www.fjsen.com/zhuanti/2022-06/19/content_31064645.htm
Xiagong (Sanming) Heavy Machinery Co., Ltd.: Focusing on the Main Industry to Build Industry Brands	http://www.fjsen.com/zhuanti/2022-06/17/content_31064185.htm	http://www.fjsen.com/zhuanti/2022-06/17/content_31064185.htm
Integrating Glory and Dreams into Mountains and Seas - Written on the Occasion of the 7th World Fujian Merchants Conference	http://overseas.fjsen.com/2022-06/17/content_31064010.htm	http://overseas.fjsen.com/2022-06/17/content_31064010.htm
Putian Quanzhou shoe and clothing industry "hand in hand" docking	http://overseas.fjsen.com/2022-06/16/content_31062946.htm	http://overseas.fjsen.com/2022-06/16/content_31062946.htm
Industrial Bank Putian Branch is fully committed to supporting Putian in stabilizing the economic situation and promoting financial vitality and development	http://pt.fjsen.com/xw/2022-06/15/content_31061818.htm	http://pt.fjsen.com/xw/2022-06/15/content_31061818.htm
Fuqing City held a symposium on interpreting the policy of integrating industry and education	http://fq.fjsen.com/2022-06/13/content_31059634.htm	http://fq.fjsen.com/2022-06/13/content_31059634.htm
Record of the seventh press conference on the theme of "Remembering the Mission and Striving for the People" and answering questions from reporters	http://fjnews.fjsen.com/2022-06/10/content_31058320.htm	http://fjnews.fjsen.com/2022-06/10/content_31058320.htm
In the first quarter, 136 leading industrial enterprises in Fuzhou contributed 60% to the industry	http://fz.fjsen.com/2022-06/10/content_31057719.htm	http://fz.fjsen.com/2022-06/10/content_31057719.htm
Nanping: Advancing towards Green Development and Accelerating the Construction of a National Green Development Demonstration Zone	http://fjnews.fjsen.com/2022-06/10/content_31057536.htm	http://fjnews.fjsen.com/2022-06/10/content_31057536.htm
Going against the trend and carrying the banner, 136 leading industrial enterprises in Fuzhou contributed 60% to the industry in the first quarter	http://www.518fuzhou.com/2022-06/10/content_31057490.htm	http://www.518fuzhou.com/2022-06/10/content_31057490.htm
Withholding and refunding taxes directly to Kuaixiang helps enterprises achieve stability and long-term success	http://fjsw.fjsen.com/2022-06/09/content_31056740.htm	http://fjsw.fjsen.com/2022-06/09/content_31056740.htm
Fuzhou continuously innovates models to attract investment	http://fz.fjsen.com/2022-06/09/content_31056332.htm	http://fz.fjsen.com/2022-06/09/content_31056332.htm
Fujian rewards up to 2 million yuan for the first batch of production and application of key new materials	http://money.fjsen.com/2022-06/08/content_31056122.htm	http://money.fjsen.com/2022-06/08/content_31056122.htm
Expand the 'circle of friends' and identify breakthrough points. Our city continuously innovates models to attract investment	http://www.518fuzhou.com/2022-06/08/content_31055454.htm	http://www.518fuzhou.com/2022-06/08/content_31055454.htm
The spirit of the Gutian Conference shines brightly on the journey	http://www.fjsen.com/zhuanti/2022-06/06/content_31053968.htm	http://www.fjsen.com/zhuanti/2022-06/06/content_31053968.htm
Carry out work creatively and build a safety protection network -- The TV feature film "Life is more important than Mount Tai" caused a warm response	http://www.fjsen.com/zhuanti/2022-06/06/content_31053395.htm	http://www.fjsen.com/zhuanti/2022-06/06/content_31053395.htm
Longyan: Seeking Progress and Development in Stability	http://www.fjsen.com/zhuanti/2022-06/06/content_31053155.htm	http://www.fjsen.com/zhuanti/2022-06/06/content_31053155.htm
Taiwanese PhD candidate Luo Weifen: The key to life is to 'persist in doing what you think is right'	http://taihai.fjsen.com/2022-06/06/content_31053118.htm	http://taihai.fjsen.com/2022-06/06/content_31053118.htm
Shouning: Adhere to ecological priority and transform "oxygen content" into "gold content"	http://fjnews.fjsen.com/2022-06/05/content_31052761.htm	http://fjnews.fjsen.com/2022-06/05/content_31052761.htm
Nanping City accelerates the implementation of the "Talent Gathering in Wuyi" action plan, attracting talents from all over the world to use - Talent Gathering in Wuyi, Wisdom Gathering in Northern Fujian	http://np.fjsen.com/2022-06/02/content_31051329.htm	http://np.fjsen.com/2022-06/02/content_31051329.htm
Jiageng Innovation Laboratory signs contract with Jinghe Investment	http://fjnews.fjsen.com/2022-06/02/content_31050842.htm	http://fjnews.fjsen.com/2022-06/02/content_31050842.htm
The 'Happiness Curve' of the Three Blessings Land - Fuqing Adheres to the Essence of the '3820' Strategic Engineering Thought, Writing a New Chapter of High Quality Development	http://fq.fjsen.com/2022-06/01/content_31050234.htm	http://fq.fjsen.com/2022-06/01/content_31050234.htm
Nanping: Gathering Talents in Wuyi, Gathering Wisdom in Northern Fujian	http://fjnews.fjsen.com/2022-06/01/content_31049773.htm	http://fjnews.fjsen.com/2022-06/01/content_31049773.htm
Quanzhou promotes new material technology achievements in the technology market	http://qz.fjsen.com/2022-05/31/content_31049670.htm	http://qz.fjsen.com/2022-05/31/content_31049670.htm
Qingliu: Combining "attracting, nurturing, and retaining" to quench the thirst for industrial talents	http://sm.fjsen.com/2022-05/31/content_31048789.htm	http://sm.fjsen.com/2022-05/31/content_31048789.htm
Fuzhou: The wind sails, the sea stretches, and the map is strong	http://www.518fuzhou.com/2022-05/31/content_31048751.htm	http://www.518fuzhou.com/2022-05/31/content_31048751.htm
Zhihui, Minbei Talent Gathering, Wuyi - Overview of Talent Work in Nanping City	http://np.fjsen.com/2022-05/31/content_31048623.htm	http://np.fjsen.com/2022-05/31/content_31048623.htm
Qingliu County: Combining "attracting, nurturing, and retaining" to quench the thirst for industrial talents	http://fjnews.fjsen.com/2022-05/31/content_31048556.htm	http://fjnews.fjsen.com/2022-05/31/content_31048556.htm
Fuqing: Industry needs precise education in colleges and universities	http://fq.fjsen.com/2022-05/30/content_31047706.htm	http://fq.fjsen.com/2022-05/30/content_31047706.htm
Putian: Innovation Leads Green Development, New Materials and New Technologies Achievement Matchmaking Conference Held	http://pt.fjsen.com/xw/2022-05/29/content_31046716.htm	http://pt.fjsen.com/xw/2022-05/29/content_31046716.htm
Putian focuses on cultivating 'enterprise seedlings' to grow into' towering trees'	http://fjnews.fjsen.com/2022-05/29/content_31046698.htm	http://fjnews.fjsen.com/2022-05/29/content_31046698.htm
Shaowu Bank of China focuses on "specialization, refinement, novelty" to create a new model of financial services	http://np.fjsen.com/2022-05/27/content_31045968.htm	http://np.fjsen.com/2022-05/27/content_31045968.htm
Why do 'large courtyards and institutions' gather in Quanzhou?	http://www.fjsen.com/r/2022-05/27/content_31045638.htm	http://www.fjsen.com/r/2022-05/27/content_31045638.htm
Daily ceramic 5G cloud smart factory project launched in Dehua	http://overseas.fjsen.com/2022-05/25/content_31043759.htm	http://overseas.fjsen.com/2022-05/25/content_31043759.htm
Shunchang County holds the 2022 Private Enterprise Recruitment Fair	http://np.fjsen.com/2022-05/24/content_31042536.htm	http://np.fjsen.com/2022-05/24/content_31042536.htm
Fuzhou has achieved high-quality economic development in the past 30 years, with a GDP leap from billions to trillions	http://www.fzccpit.org/2022-05/24/content_31042338.htm	http://www.fzccpit.org/2022-05/24/content_31042338.htm
Fuzhou's high-quality economic development over the past 30 years has achieved a leap in GDP from billions to trillions	http://www.518fuzhou.com/2022-05/24/content_31042320.htm	http://www.518fuzhou.com/2022-05/24/content_31042320.htm
Xiamen Accelerates the Construction of Industrial Internet to Boost the Development of Advanced Manufacturing Industry	http://xm.fjsen.com/2022-05/24/content_31042035.htm	http://xm.fjsen.com/2022-05/24/content_31042035.htm
Chasing the Light | This is the speed of Chinese manufacturing!	http://www.fjsen.com/2022-05/23/content_31041180.htm	http://www.fjsen.com/2022-05/23/content_31041180.htm
Thirty Years of Trending and Creating a New Future - Fuzhou Adheres to the Essence of the "3820" Strategic Engineering Thought and Continuously Promotes High Quality Economic Development	http://fjnews.fjsen.com/2022-05/21/content_31040030.htm	http://fjnews.fjsen.com/2022-05/21/content_31040030.htm
The upgraded version of the special envoy system has been launched - turning the "golden hat" into a "golden rice bowl"	http://fjnews.fjsen.com/2022-05/21/content_31040036.htm	http://fjnews.fjsen.com/2022-05/21/content_31040036.htm
Sanming Qingliu Construction Industry Education Integration Training Base Promotes the Development of Fluorine New Materials Industry	http://sm.fjsen.com/2022-05/19/content_31038087.htm	http://sm.fjsen.com/2022-05/19/content_31038087.htm
Following a chain path, Putian New Materials Cluster makes great strides forward	http://overseas.fjsen.com/2022-05/16/content_31035033.htm	http://overseas.fjsen.com/2022-05/16/content_31035033.htm
Excerpts from the Symposium on Studying and Implementing the Important Speech of General Secretary Xi Jinping during his Visit to Renmin University of China	http://fjnews.fjsen.com/2022-05/16/content_31035009.htm	http://fjnews.fjsen.com/2022-05/16/content_31035009.htm
Postal Savings Bank of China Nanping Branch actively supports the growth of local technology-based small and micro enterprises	http://np.fjsen.com/2022-05/13/content_31033981.htm	http://np.fjsen.com/2022-05/13/content_31033981.htm
Provincial Department of Science and Technology sends congratulatory letter to Longyan	http://ly.fjsen.com/2022-05/13/content_31038938.htm	http://ly.fjsen.com/2022-05/13/content_31038938.htm
Ye Renyou went to Jiangyin Port City Economic Zone for research	http://fq.fjsen.com/2022-05/12/content_31032545.htm	http://fq.fjsen.com/2022-05/12/content_31032545.htm
Jianyang: Promoting the development of new building materials and practicing the concept of green development	http://np.fjsen.com/2022-05/09/content_31029463.htm	http://np.fjsen.com/2022-05/09/content_31029463.htm
In the first quarter, the growth rate of 5 economic indicators ranked first in Fuzhou. Fuqing: Faster, better, and more practical, improving efficiency and gathering strength, "opening the door well"	http://fq.fjsen.com/2022-05/07/content_31027737.htm	http://fq.fjsen.com/2022-05/07/content_31027737.htm
The only one in the province! Xiamen Ocean High tech Industrial Park settles in Xiang'an	http://xm.fjsen.com/2022-05/07/content_31027255.htm	http://xm.fjsen.com/2022-05/07/content_31027255.htm
The Ministry of Ecology and Environment has released 9 typical cases of cracking down on illegal environmental crimes involving hazardous waste	http://news.fjsen.com/2022-05/06/content_31026813.htm	http://news.fjsen.com/2022-05/06/content_31026813.htm
Fuqing: Faster, better, and more practical, improving efficiency and gathering strength to make a good start	http://fq.fjsen.com/2022-05/05/content_31025970.htm	http://fq.fjsen.com/2022-05/05/content_31025970.htm
Fuqing: Striving forward with picturesque scenery, sailing with boats and surging with new trends	http://fq.fjsen.com/2022-05/05/content_31025965.htm	http://fq.fjsen.com/2022-05/05/content_31025965.htm
Fuqing is even more exciting	http://fq.fjsen.com/2022-05/05/content_31025879.htm	http://fq.fjsen.com/2022-05/05/content_31025879.htm
The opening of the China Europe freight train (Honggutian) has brought strong development momentum to Longyan's foreign trade enterprises	http://ly.fjsen.com/2022-05/05/content_31036789.htm	http://ly.fjsen.com/2022-05/05/content_31036789.htm
Continuing the story of spring | Tianjin's time-honored brand breaks through the cracks and enters a new market	http://www.fjsen.com/2022-04/30/content_31023081.htm	http://www.fjsen.com/2022-04/30/content_31023081.htm
Focus on sinking services, sinking resources, sinking Fuqing frontline services, promoting project construction to 'accelerate'	http://fq.fjsen.com/2022-04/29/content_31022546.htm	http://fq.fjsen.com/2022-04/29/content_31022546.htm
The Shanghang enterprise project won the Excellence Award in the National Disruptive Technology Innovation Competition	http://fjnews.fjsen.com/2022-04/26/content_31018676.htm	http://fjnews.fjsen.com/2022-04/26/content_31018676.htm
Establishing five major investment groups to revitalize inefficient idle land, Fuqing gathers strength for county-level integrated reform	http://fq.fjsen.com/2022-04/25/content_31018147.htm	http://fq.fjsen.com/2022-04/25/content_31018147.htm
Longyan: Promoting High Quality Development and Revitalizing Development through Comparative Learning and Surpassing	http://ly.fjsen.com/2022-04/25/content_31024197.htm	http://ly.fjsen.com/2022-04/25/content_31024197.htm
Fudan University's innovative achievements have been selected as one of the top ten scientific and technological advances in Chinese universities	http://fjnews.fjsen.com/2022-04/25/content_31017839.htm	http://fjnews.fjsen.com/2022-04/25/content_31017839.htm
Shunchang County Government and Enterprise "Double Week" Tea Talk Exchange Symposium Held	http://np.fjsen.com/2022-04/24/content_31017229.htm	http://np.fjsen.com/2022-04/24/content_31017229.htm
Fuqing ranked first in Fuzhou in terms of the growth rate of 5 economic indicators in the first quarter	http://fq.fjsen.com/2022-04/24/content_31016820.htm	http://fq.fjsen.com/2022-04/24/content_31016820.htm
That's amazing! This research achievement from Fujian has been selected as one of the "Top Ten Scientific and Technological Advances in Chinese Universities"	http://fz.fjsen.com/2022-04/24/content_31016612.htm	http://fz.fjsen.com/2022-04/24/content_31016612.htm
Five firsts! Fuqing's economic development has a good start!	http://fjnews.fjsen.com/2022-04/23/content_31016330.htm	http://fjnews.fjsen.com/2022-04/23/content_31016330.htm
Frontline service, specialized team service, and talent service. Fuqing Rongqiao Development Zone achieved a "good start" in the first quarter	http://fq.fjsen.com/2022-04/22/content_31015708.htm	http://fq.fjsen.com/2022-04/22/content_31015708.htm
Shaowu: Cultivate leading industrial aircraft carriers and gather billion dollar industrial clusters	http://np.fjsen.com/2022-04/22/content_31014783.htm	http://np.fjsen.com/2022-04/22/content_31014783.htm
Da Mei Ji Mei is full of vitality	http://xm.fjsen.com/2022-04/21/content_31017273.htm	http://xm.fjsen.com/2022-04/21/content_31017273.htm
Zhangping: Focus on key points and make efforts to improve quality and efficiency	http://ly.fjsen.com/2022-04/21/content_31022849.htm	http://ly.fjsen.com/2022-04/21/content_31022849.htm
Fujian scientists unlock new skill for 'Nano Prince'	http://fjnews.fjsen.com/2022-04/21/content_31014121.htm	http://fjnews.fjsen.com/2022-04/21/content_31014121.htm
Shanghang: Keep and use talents well	http://fjnews.fjsen.com/2022-04/21/content_31013997.htm	http://fjnews.fjsen.com/2022-04/21/content_31013997.htm
Quangang holds centralized signing and completion activities with a total investment of 59.8 billion yuan	http://qz.fjsen.com/2022-04/20/content_31013853.htm	http://qz.fjsen.com/2022-04/20/content_31013853.htm
Eight major projects are being launched in the High tech Zone to create a new model for government, school, and enterprise research and development	http://fz.fjsen.com/2022-04/20/content_31013210.htm	http://fz.fjsen.com/2022-04/20/content_31013210.htm
TV Feature | Life is Heavier than Mount Tai	http://www.fjsen.com/2022-04/19/content_31012677.htm	http://www.fjsen.com/2022-04/19/content_31012677.htm
The world's largest polypropylene plant is expected to start production in Fuzhou in June	http://fz.fjsen.com/2022-04/19/content_31011832.htm	http://fz.fjsen.com/2022-04/19/content_31011832.htm
The world's largest annual production of 1.2 million tons of multi polymer polypropylene plant has been delivered and accepted	http://fjnews.fjsen.com/2022-04/19/content_31011769.htm	http://fjnews.fjsen.com/2022-04/19/content_31011769.htm
Improve efficiency, enhance effectiveness, and increase benefits	http://fjnews.fjsen.com/2022-04/19/content_31011762.htm	http://fjnews.fjsen.com/2022-04/19/content_31011762.htm
Pucheng: Government, banks, and enterprises hold hands closely to promote win-win cooperation	http://np.fjsen.com/2022-04/18/content_31011440.htm	http://np.fjsen.com/2022-04/18/content_31011440.htm
Published in Science! Xiamen University team discovers for the first time the function of 'Nano Prince'	http://fjnews.fjsen.com/2022-04/15/content_31009892.htm	http://fjnews.fjsen.com/2022-04/15/content_31009892.htm
Xiamen University scientists use fullerene to break through the "bottleneck" in atmospheric pressure synthesis of ethylene glycol	http://xm.fjsen.com/2022-04/15/content_31009208.htm	http://xm.fjsen.com/2022-04/15/content_31009208.htm
Fuqing Rongqiao Development Zone achieved a "good start" in the first quarter	http://fz.fjsen.com/2022-04/15/content_31008978.htm	http://fz.fjsen.com/2022-04/15/content_31008978.htm
Experts from Fujian Provincial Quality Inspection Institute have been selected for the 2021 Hundred, Thousand, and Ten Thousand Talents Project in the province	http://www.fjsen.com/zhuanti/2022-04/14/content_31008222.htm	http://www.fjsen.com/zhuanti/2022-04/14/content_31008222.htm
Zhongjing Petrochemical takes the path of globalization well and aims to build the world's only BOPP full industry chain enterprise worth billions of yuan within five years	http://fq.fjsen.com/2022-04/13/content_31006919.htm	http://fq.fjsen.com/2022-04/13/content_31006919.htm
Ningde Pingnan: "Two New" organizations work together to gather positive energy for epidemic prevention	http://wmf.fjsen.com/2022-04/13/content_31006829.htm	http://wmf.fjsen.com/2022-04/13/content_31006829.htm
Seize the opportunity to embark on a new journey and write a new chapter in special inspection | A side note on Fujian Provincial Special Inspection Institute's efforts to achieve a "good start" in the first quarter	http://www.fjsen.com/zhuanti/2022-04/13/content_31006749.htm	http://www.fjsen.com/zhuanti/2022-04/13/content_31006749.htm
Zhangzhou City Leaders Lead Team to Conduct Work Inspection of the Municipal Party Committee and Government	http://zzpd.fjsen.com/2022-04/13/content_31006687.htm	http://zzpd.fjsen.com/2022-04/13/content_31006687.htm
Provincial key project Torch Graphene New Materials Industrial Park is planned to be put into operation before the end of April	http://xm.fjsen.com/2022-04/10/content_31003973.htm	http://xm.fjsen.com/2022-04/10/content_31003973.htm
Putian: Striving for 'Double Victory', Fu Chaoyang conducts in-depth enterprise research	http://pt.fjsen.com/xw/2022-04/08/content_31002560.htm	http://pt.fjsen.com/xw/2022-04/08/content_31002560.htm
Agricultural Bank of China Putian Xiuyu Branch fully supports enterprises in resuming work and production	http://pt.fjsen.com/xw/2022-04/07/content_31002166.htm	http://pt.fjsen.com/xw/2022-04/07/content_31002166.htm
Shunchang accelerates the high-quality development of industrial parks	http://np.fjsen.com/2022-04/03/content_30999408.htm	http://np.fjsen.com/2022-04/03/content_30999408.htm
Encourage technological innovation in the manufacturing industry. Fujian plans to select 50 projects	http://fjnews.fjsen.com/2022-04/03/content_30999265.htm	http://fjnews.fjsen.com/2022-04/03/content_30999265.htm
The total planned investment for Yunxiao in the second quarter is 2.98 billion yuan, and key projects will be completed in a concentrated manner	http://zzpd.fjsen.com/2022-04/02/content_30998960.htm	http://zzpd.fjsen.com/2022-04/02/content_30998960.htm
The municipal ecological environment department supports the economic construction in the first quarter	http://fz.fjsen.com/2022-04/01/content_30997367.htm	http://fz.fjsen.com/2022-04/01/content_30997367.htm
Xiamen Torch High tech Zone: A 'package' policy to promote talent to take root	http://fjnews.fjsen.com/2022-04/01/content_30997072.htm	http://fjnews.fjsen.com/2022-04/01/content_30997072.htm
Resolutely grasp the project of Zhongjing Petrochemical and walk the path of globalization well	http://www.fzccpit.org/2022-03/30/content_30995111.htm	http://www.fzccpit.org/2022-03/30/content_30995111.htm
Wind Rises, 'Harbor City' Builds Dreams, 'New Blue Ocean'	http://fq.fjsen.com/2022-03/29/content_30994250.htm	http://fq.fjsen.com/2022-03/29/content_30994250.htm
Various sectors are discussing the implementation of General Secretary Xi Jinping's important speech during his inspection visit to Fujian throughout the city	http://qz.fjsen.com/2022-03/27/content_30992385.htm	http://qz.fjsen.com/2022-03/27/content_30992385.htm
The Green Transformation of Mulan River in Fujian Province	http://www.fjsen.com/2022-03/26/content_30992130.htm	http://www.fjsen.com/2022-03/26/content_30992130.htm
Fu'an Wanwu Stainless Steel New Material Industrial Park has been approved as a national demonstration base for new industrialization industry	http://www.fjsen.com/content/2022-03/25/content_30991637.htm	http://www.fjsen.com/content/2022-03/25/content_30991637.htm
Warmth of Love, Mountains and Seas, Rise of Ambition - Fujian Cadres and Masses Remember General Secretary's Teachings and Forge Ahead on a New Journey	http://fjnews.fjsen.com/2022-03/25/content_30990941.htm	http://fjnews.fjsen.com/2022-03/25/content_30990941.htm
Echoes of Spring | Cultivating Virtue and People, Adapting to Needs' Seeking the Best '	http://fjnews.fjsen.com/2022-03/23/content_30988960.htm	http://fjnews.fjsen.com/2022-03/23/content_30988960.htm
Cui Yonghui promotes key project construction on-site	http://xm.fjsen.com/2022-03/18/content_30984977.htm	http://xm.fjsen.com/2022-03/18/content_30984977.htm
The construction of major industrial projects in Fuzhou is in full swing, accumulating new momentum for high-quality development	http://tv.fjsen.com/2022-03/16/content_30983407.htm	http://tv.fjsen.com/2022-03/16/content_30983407.htm
The construction plan for the pilot city of "Science and Technology Innovation China" in Fuzhou has been released: introducing innovative elements to create a model of "Science and Technology Innovation Fuzhou"	http://www.fzccpit.org/2022-03/16/content_30983173.htm	http://www.fzccpit.org/2022-03/16/content_30983173.htm
The construction plan for the pilot city of "Science and Technology Innovation China" in Fuzhou has been released: introducing innovative elements to create a model of "Science and Technology Innovation Fuzhou"	http://www.518fuzhou.com/2022-03/16/content_30983166.htm	http://www.518fuzhou.com/2022-03/16/content_30983166.htm
Continue to polish the "golden signboard" of the Science and Technology Commission	http://np.fjsen.com/2022-03/15/content_30982003.htm	http://np.fjsen.com/2022-03/15/content_30982003.htm
Exploring the "Fu'an Model" of "Ningde Service"	http://nd.fjsen.com/2022-03/14/content_30981182.htm	http://nd.fjsen.com/2022-03/14/content_30981182.htm
Who holds the colorful "chain" and dances in the sky? Fuzhou's 16 key industrial chains cluster, develop, optimize and upgrade	http://www.fzccpit.org/2022-03/14/content_30981093.htm	http://www.fzccpit.org/2022-03/14/content_30981093.htm
16 key industrial chains in Fuzhou are clustered, developed, optimized, and upgraded	http://fz.fjsen.com/2022-03/14/content_30980856.htm	http://fz.fjsen.com/2022-03/14/content_30980856.htm
Striving for a 'good start', Industrial Bank adds new momentum to Fujian's economic development	http://qz.fjsen.com/2022-03/11/content_30980129.htm	http://qz.fjsen.com/2022-03/11/content_30980129.htm
This enterprise in Fuzhou High tech Zone is deeply involved in the field of regenerative medicine, with an annual output value of 400 million yuan	http://fjwsjk.fjsen.com/2022-03/11/content_30980011.htm	http://fjwsjk.fjsen.com/2022-03/11/content_30980011.htm
City leaders led a team to conduct a special research activity on the development of green economy industries in Luojiang	http://qz.fjsen.com/2022-03/10/content_30979112.htm	http://qz.fjsen.com/2022-03/10/content_30979112.htm
Accelerating the construction of key areas in Xiamen Xiang'an to contribute to high-quality development	http://xm.fjsen.com/2022-03/10/content_30979019.htm	http://xm.fjsen.com/2022-03/10/content_30979019.htm
A think tank has arrived at Xiamen Marine High tech Industrial Park	http://xm.fjsen.com/2022-03/10/content_30978376.htm	http://xm.fjsen.com/2022-03/10/content_30978376.htm
Shaowu Green Industry Development Seminar held	http://np.fjsen.com/2022-03/08/content_30977232.htm	http://np.fjsen.com/2022-03/08/content_30977232.htm
Songxi Economic Development Zone: The 'tiger' is fully unleashed, seeking innovation and change	http://np.fjsen.com/2022-03/08/content_30977091.htm	http://np.fjsen.com/2022-03/08/content_30977091.htm
Fujian promotes the expansion, strengthening, and optimization of tea exports, striving to achieve the first export scale in the country by 2022	http://fjnews.fjsen.com/2022-03/04/content_30974032.htm	http://fjnews.fjsen.com/2022-03/04/content_30974032.htm
Provincial leaders came to Yan to carry out research on the development of the private economy	http://ly.fjsen.com/2022-03/03/content_30972927.htm	http://ly.fjsen.com/2022-03/03/content_30972927.htm
Advancing towards a Strong Sea Map and Advancing into Deep Blue - Overview of the Development of Fuqing's Marine Economy	http://fq.fjsen.com/2022-03/03/content_30972683.htm	http://fq.fjsen.com/2022-03/03/content_30972683.htm
It's about to start! These students have the opportunity to attend prestigious universities such as Tsinghua University and Peking University! The admission score line for Fujian is	http://fjnews.fjsen.com/2022-03/03/content_30972425.htm	http://fjnews.fjsen.com/2022-03/03/content_30972425.htm
Heavy announcement! 45 projects from Fuqing have been selected!	http://fq.fjsen.com/2022-03/02/content_30971455.htm	http://fq.fjsen.com/2022-03/02/content_30971455.htm
Last year, the export volume of shoes and boots in Putian increased by over 40%	http://overseas.fjsen.com/2022-03/02/content_30971361.htm	http://overseas.fjsen.com/2022-03/02/content_30971361.htm
Songxi: Rivet your feet with "tiger strength" and sprint for a "good start"	http://np.fjsen.com/2022-03/01/content_30970850.htm	http://np.fjsen.com/2022-03/01/content_30970850.htm
Chunfeng leverages Qianfan to compete in Fuzhou and continues to make efforts to promote the five major international brands	http://www.fzccpit.org/2022-02/28/content_30969600.htm	http://www.fzccpit.org/2022-02/28/content_30969600.htm
The Chief Service Officer delivers "exclusive services" to accelerate the construction progress of the Fuqing project	http://fq.fjsen.com/2022-02/28/content_30969498.htm	http://fq.fjsen.com/2022-02/28/content_30969498.htm
Zhangzhou Jinfeng Economic Development Zone: Full throttle production	http://fjnews.fjsen.com/2022-02/28/content_30969306.htm	http://fjnews.fjsen.com/2022-02/28/content_30969306.htm
The 2020 Fujian Science and Technology Awards were announced, and 23 projects in Quanzhou won awards	http://qz.fjsen.com/2022-02/27/content_30969128.htm	http://qz.fjsen.com/2022-02/27/content_30969128.htm
181 projects in Sanming City have been shortlisted as key construction projects in Fujian Province	http://sm.fjsen.com/2022-02/27/content_30969087.htm	http://sm.fjsen.com/2022-02/27/content_30969087.htm
The results of the 7th Patent Award selection in Nanping City have been announced	http://np.fjsen.com/2022-02/25/content_30968023.htm	http://np.fjsen.com/2022-02/25/content_30968023.htm
All four national enterprise technology centers in Fuqing City have passed the national evaluation	http://fq.fjsen.com/2022-02/24/content_30967392.htm	http://fq.fjsen.com/2022-02/24/content_30967392.htm
The three major engines are working hard, and Lan Island is surging with the spring tide of improving efficiency	http://ptxw.fjsen.com/2022-02/24/content_30967944.htm	http://ptxw.fjsen.com/2022-02/24/content_30967944.htm
Announcement of the Fuzhou Municipal Committee of the Communist Party of China on the Progress of Inspection and Rectification	http://fz.fjsen.com/2022-02/22/content_30965350.htm	http://fz.fjsen.com/2022-02/22/content_30965350.htm
Fuzhou High tech Zone signs 16 key projects in spring	http://www.518fuzhou.com/2022-02/21/content_30965149.htm	http://www.518fuzhou.com/2022-02/21/content_30965149.htm
The 2022 New Year Online Media Tour to Grassroots and the "World Heritage Quanzhou Tour" Wind Collection Activity Enters Luojiang	http://qz.fjsen.com/2022-02/21/content_30964808.htm	http://qz.fjsen.com/2022-02/21/content_30964808.htm
Quanzhou Luojiang: Stepping on the "Wind and Fire Wheel" to forge ahead on a new journey	http://qz.fjsen.com/2022-02/21/content_30964724.htm	http://qz.fjsen.com/2022-02/21/content_30964724.htm
Write the paper on red soil	http://ly.fjsen.com/2022-02/21/content_30967893.htm	http://ly.fjsen.com/2022-02/21/content_30967893.htm
Developing towards the sea is a blessed state	http://www.fjsen.com/2022-02/20/content_30964422.htm	http://www.fjsen.com/2022-02/20/content_30964422.htm
Striving to achieve a good start, Helitai's various production lines are operating at full capacity, racing against time to ensure delivery	http://fjnews.fjsen.com/2022-02/19/content_30964182.htm	http://fjnews.fjsen.com/2022-02/19/content_30964182.htm
Yunxiao County leaders visit industrial enterprises to promote a good start	http://zzpd.fjsen.com/2022-02/17/content_30961783.htm	http://zzpd.fjsen.com/2022-02/17/content_30961783.htm
Industrial Bank Putian Branch: Empowering Industrial Integration with "Financing+Integrated Intelligence"	http://pt.fjsen.com/xw/2022-02/17/content_30963031.htm	http://pt.fjsen.com/xw/2022-02/17/content_30963031.htm
Seizing the opportunity of early spring, Putian Xianyou is fully motivated to sprint for a "good start"	http://pt.fjsen.com/xw/2022-02/17/content_30962658.htm	http://pt.fjsen.com/xw/2022-02/17/content_30962658.htm
Two companies from Fuqing City have been listed on the 2021 "Science and Technology Innovation China" list	http://fq.fjsen.com/2022-02/16/content_30961770.htm	http://fq.fjsen.com/2022-02/16/content_30961770.htm
The four major parks in Fuqing only use 6% of the land, creating 85% of the city's industrial output value above designated size. Standardized parks are being built to create "champion level" enterprises	http://fq.fjsen.com/2022-02/15/content_30960712.htm	http://fq.fjsen.com/2022-02/15/content_30960712.htm
Confidence in the development of small and medium-sized enterprises continues to recover	http://www.fjsen.com/2022-02/15/content_30960696.htm	http://www.fjsen.com/2022-02/15/content_30960696.htm
16 major projects in Fuzhou High tech Zone signed contracts with a total investment of 15.5 billion yuan	http://www.fzccpit.org/2022-02/15/content_30960641.htm	http://www.fzccpit.org/2022-02/15/content_30960641.htm
China Quality Award "Five Golden Flowers" Falling in Fuqing	http://fq.fjsen.com/2022-02/14/content_30959876.htm	http://fq.fjsen.com/2022-02/14/content_30959876.htm
Leaders of Quanzhou City Visit Enterprises, Merchants, and Talents	http://qz.fjsen.com/2022-02/14/content_30959280.htm	http://qz.fjsen.com/2022-02/14/content_30959280.htm
Fuqing: Building standardized parks and creating "champion level" enterprises	http://fjnews.fjsen.com/2022-02/13/content_30958893.htm	http://fjnews.fjsen.com/2022-02/13/content_30958893.htm
Striving for progress while maintaining stability and taking action in practice · China's industrial economy opens up a new chapter | 2022 foreign trade keywords: "stability"	http://www.fjsen.com/2022-02/12/content_30958842.htm	http://www.fjsen.com/2022-02/12/content_30958842.htm
Shishi City Enterprise Development Conference held, government and enterprises work together to strive for the future	http://qz.fjsen.com/2022-02/11/content_30958652.htm	http://qz.fjsen.com/2022-02/11/content_30958652.htm
The 2021 "Science and Technology Innovation China" List is Publicly Released! These projects and enterprises from Fujian are on the list	http://fjnews.fjsen.com/2022-02/11/content_30958485.htm	http://fjnews.fjsen.com/2022-02/11/content_30958485.htm
Yin Li emphasized during his research in Fuqing that the Party building should lead all work to improve efficiency, enhance effectiveness, and increase benefits, striving to achieve a stable and successful start to the first quarter	http://fq.fjsen.com/2022-02/11/content_30958268.htm	http://fq.fjsen.com/2022-02/11/content_30958268.htm
Yin Li is conducting research in Fuqing	http://women.fjsen.com/2022-02/11/content_30958203.htm	http://women.fjsen.com/2022-02/11/content_30958203.htm
Fuzhou accelerates the construction of the "Silk Road Port City" and adds vitality to the RCEP dividend	http://www.fzccpit.org/2022-02/11/content_30958091.htm	http://www.fzccpit.org/2022-02/11/content_30958091.htm
Fuqing: Achieving a 'good start' with 'acceleration' in production	http://fq.fjsen.com/2022-02/09/content_30956440.htm	http://fq.fjsen.com/2022-02/09/content_30956440.htm
What is the power of the world's first thousand ton high-speed railway bridge building machine, the Kunlun?	http://news.fjsen.com/2022-02/09/content_30956197.htm	http://news.fjsen.com/2022-02/09/content_30956197.htm
Before and after the Spring Festival, various regions are concerned about the development of private enterprises: the development of private enterprises is better in Fujian	http://money.fjsen.com/2022-02/08/content_30955881.htm	http://money.fjsen.com/2022-02/08/content_30955881.htm
19 projects in Fuqing have started construction with a total investment of 11.7 billion yuan	http://fz.fjsen.com/2022-02/08/content_30955449.htm	http://fz.fjsen.com/2022-02/08/content_30955449.htm
Minhou ranked first in the province in the comprehensive evaluation of positive incentives for the "Five Batches" in the fourth quarter of last year	http://fz.fjsen.com/2022-01/29/content_30950877.htm	http://fz.fjsen.com/2022-01/29/content_30950877.htm
Industrial Bank Quanzhou Branch: Supporting Quanzhou Technology Enterprises to Take the Green and Low Carbon Path	http://qz.fjsen.com/2022-01/27/content_30947956.htm	http://qz.fjsen.com/2022-01/27/content_30947956.htm
On the occasion of the closing of the Provincial Two Sessions: Take the road to the exam and move towards the future together	http://my.fjsen.com/2022-01/26/content_30948429.htm	http://my.fjsen.com/2022-01/26/content_30948429.htm
Xiangcheng: Expand and strengthen leading industries, build a modern economic system	http://zzpd.fjsen.com/2022-01/25/content_30946067.htm	http://zzpd.fjsen.com/2022-01/25/content_30946067.htm
Fuqing: Innovation leads, high-quality development strides forward	http://fq.fjsen.com/2022-01/24/content_30945649.htm	http://fq.fjsen.com/2022-01/24/content_30945649.htm
Representatives and members discuss vigorously: striving to achieve "stable opening" and "successful opening"	http://sm.fjsen.com/2022-01/24/content_30945553.htm	http://sm.fjsen.com/2022-01/24/content_30945553.htm
The investment completion amount of key projects in Xiamen City exceeded 200 billion yuan for the first time in 2021	http://xm.fjsen.com/2022-01/24/content_30945194.htm	http://xm.fjsen.com/2022-01/24/content_30945194.htm
Representatives and members discuss vigorously - striving to achieve "stable opening" and "successful opening"	http://fjnews.fjsen.com/2022-01/24/content_30945177.htm	http://fjnews.fjsen.com/2022-01/24/content_30945177.htm
Yin Li participated in the deliberation of the Ningde delegation at the 6th session of the 13th Provincial People's Congress	http://fjnews.fjsen.com/2022-01/23/content_30944913.htm	http://fjnews.fjsen.com/2022-01/23/content_30944913.htm
Luo Fang: Vigorously developing the marine economy and building a 'maritime Fujian'	http://fjnews.fjsen.com/2022-01/23/content_30944959.htm	http://fjnews.fjsen.com/2022-01/23/content_30944959.htm
Fujian: Optimizing the economic system and promoting the transformation of quality, efficiency, and driving force	http://fjnews.fjsen.com/2022-01/23/content_30944936.htm	http://fjnews.fjsen.com/2022-01/23/content_30944936.htm
Cui Yonghui Accepts an Exclusive Interview with CCTV CCTV News	http://xm.fjsen.com/2022-01/23/content_30944931.htm	http://xm.fjsen.com/2022-01/23/content_30944931.htm
Fujian: Creating Four Articles to Cultivate New Growth Poles	http://fjnews.fjsen.com/2022-01/23/content_30944924.htm	http://fjnews.fjsen.com/2022-01/23/content_30944924.htm
The new technology of Xiamen Haicang Port Passage is being promoted and applied throughout the province	http://xm.fjsen.com/2022-01/21/content_30944379.htm	http://xm.fjsen.com/2022-01/21/content_30944379.htm
Implementing the strategy of strengthening the provincial council and striving to build a national level regional innovation center - Interview with Wei Bangzhong, Secretary of the Party Working Committee of Fuzhou High tech Zone	http://fz.fjsen.com/2022-01/21/content_30943746.htm	http://fz.fjsen.com/2022-01/21/content_30943746.htm
Proposal and Progress on Handling of Delegates' Proposals for the Fifth Session of the Thirteenth People's Congress of Fujian Province	http://fjnews.fjsen.com/2022-01/21/content_30943656.htm	http://fjnews.fjsen.com/2022-01/21/content_30943656.htm
Top 10 Textile Technologies in China Released in Jinjiang	http://qz.fjsen.com/2022-01/20/content_30942680.htm	http://qz.fjsen.com/2022-01/20/content_30942680.htm
Study, Propaganda, and Implementation of the Spirit of the Provincial Party Congress and the Eight Fujian Expedition "Enters Xiangcheng, Zhangzhou	http://zzpd.fjsen.com/2022-01/19/content_30941309.htm	http://zzpd.fjsen.com/2022-01/19/content_30941309.htm
Quangang wholeheartedly serves the people with practical and livelihood benefits, and the "ledger" warms people's hearts	http://qz.fjsen.com/2022-01/19/content_30941678.htm	http://qz.fjsen.com/2022-01/19/content_30941678.htm
The first batch of provincial-level "Party Member Integrity Demonstration (Store) Enterprises" list has been announced	http://www.fjsen.com/zhuanti/2022-01/17/content_30939876.htm	http://www.fjsen.com/zhuanti/2022-01/17/content_30939876.htm
Qingtuo Group: Innovation driven opening of the "post-100 billion" era	http://nd.fjsen.com/2022-01/17/content_30939732.htm	http://nd.fjsen.com/2022-01/17/content_30939732.htm
Accelerating the Construction of High Quality, High Beauty, and Strong Provincial Capital Central City Area - Interview with Lin Tao, Secretary of Jin'an District Committee	http://fz.fjsen.com/2022-01/17/content_30939215.htm	http://fz.fjsen.com/2022-01/17/content_30939215.htm
Interview with Zhou Naisong, Secretary of Shouning County Party Committee: Writing a New Answer Sheet for High Quality Development in the "Three Color Article"	http://fjnews.fjsen.com/2022-01/17/content_30939178.htm	http://fjnews.fjsen.com/2022-01/17/content_30939178.htm
The 8th "Cross Strait Cup" National Calligraphy and Painting Exhibition opened in Xiamen: A variety of calligraphy and painting works bloom together to express the long-lasting cross-strait relationship	http://www.fjsen.com/zhuanlan/2022-01/15/content_31197758.htm	http://www.fjsen.com/zhuanlan/2022-01/15/content_31197758.htm
The question of pen tip steel has an answer in Fujian	http://fjnews.fjsen.com/2022-01/14/content_30937652.htm	http://fjnews.fjsen.com/2022-01/14/content_30937652.htm
Fu'an Qingtuo Group's innovation driven development has trained a billion dollar 'Iron Man'	http://fjnews.fjsen.com/2022-01/13/content_30937611.htm	http://fjnews.fjsen.com/2022-01/13/content_30937611.htm
Fujian universities focus on bridging the "last mile" of transforming scientific and technological achievements into productivity	http://fjnews.fjsen.com/2022-01/13/content_30936689.htm	http://fjnews.fjsen.com/2022-01/13/content_30936689.htm
The First China ASEAN Internet Celebrity Conference and "Fujian Brand Maritime Silk Road Tour" Enter Internet Celebrity "Fuqi"	http://www.fzccpit.org/2022-01/12/content_30936298.htm	http://www.fzccpit.org/2022-01/12/content_30936298.htm
The full text is here! Fuzhou Municipal Government Work Report Released	http://fz.fjsen.com/2022-01/12/content_30935895.htm	http://fz.fjsen.com/2022-01/12/content_30935895.htm
Through continuous research and development, expanding industrial clusters, and cultivating innovative fertile ground, Fuqing Manufacturing Industry steadily moves towards high-end development	http://fq.fjsen.com/2022-01/11/content_30935207.htm	http://fq.fjsen.com/2022-01/11/content_30935207.htm
Fuqing: Striving for Innovation and Becoming a Champion	http://fq.fjsen.com/2022-01/11/content_30935200.htm	http://fq.fjsen.com/2022-01/11/content_30935200.htm
Remembering the Instructions of General Secretary · Enterprise Research Record: Ordos Reshaping	http://www.fjsen.com/2022-01/11/content_30935188.htm	http://www.fjsen.com/2022-01/11/content_30935188.htm
Innovative development mechanism solidly promotes coordinated regional development in Fujian	http://fjnews.fjsen.com/2022-01/11/content_30935085.htm	http://fjnews.fjsen.com/2022-01/11/content_30935085.htm
Visit to Xianyou County Party Secretary Wu Wen'en: Accelerating Integrated Development to Build a Beautiful Xianyou	http://fjnews.fjsen.com/2022-01/11/content_30934911.htm	http://fjnews.fjsen.com/2022-01/11/content_30934911.htm
What are the highlights of Xiamen's economic and social development this year?	http://xm.fjsen.com/2022-01/08/content_30933290.htm	http://xm.fjsen.com/2022-01/08/content_30933290.htm
Xinhua News Agency broadcasts interview report with Xiamen Municipal Party Secretary Cui Yonghui	http://xm.fjsen.com/2022-01/08/content_30933276.htm	http://xm.fjsen.com/2022-01/08/content_30933276.htm
10 projects signed with a total investment of 3.66 billion yuan	http://qz.fjsen.com/2022-01/07/content_30932945.htm	http://qz.fjsen.com/2022-01/07/content_30932945.htm
Infinite excitement in Fuqing	http://fq.fjsen.com/2022-01/06/content_30932150.htm	http://fq.fjsen.com/2022-01/06/content_30932150.htm
New Butterfly Transformation of Urban Energy Level: Promoting Development with "One Core and Three Zones"	http://cl.fjsen.com/2022-01/06/content_30927055.htm	http://cl.fjsen.com/2022-01/06/content_30927055.htm
Mawei: Strengthen 4 main industrial chains and 2 characteristic industrial chains	http://fz.fjsen.com/2022-01/06/content_30931549.htm	http://fz.fjsen.com/2022-01/06/content_30931549.htm
The first session of the 14th People's Congress of Sanming City has opened, and the government work report is full of valuable information!	http://sm.fjsen.com/2022-01/05/content_30931366.htm	http://sm.fjsen.com/2022-01/05/content_30931366.htm
The blessed state has a large pattern - one of the series reviews on accelerating the construction of modern international cities	http://fz.fjsen.com/2022-01/05/content_30930667.htm	http://fz.fjsen.com/2022-01/05/content_30930667.htm
Promoting high-quality green development with the proposal of "high aesthetics"	http://np.fjsen.com/2022-01/04/content_30929956.htm	http://np.fjsen.com/2022-01/04/content_30929956.htm
Expanding high-quality development Xintiandi Xiamen held a centralized project commencement again today	http://xm.fjsen.com/2022-01/04/content_30929747.htm	http://xm.fjsen.com/2022-01/04/content_30929747.htm
Striving forward on the front line of the project to welcome the new year	http://nd.fjsen.com/2022-01/03/content_30929358.htm	http://nd.fjsen.com/2022-01/03/content_30929358.htm
The Xiamen Zhangzhou section of the Fuzhou Xiamen high-speed railway has entered the sprint stage	http://fjnews.fjsen.com/2022-01/03/content_30929279.htm	http://fjnews.fjsen.com/2022-01/03/content_30929279.htm
39 Fujian enterprises have been shortlisted for the 2021 National Green Manufacturing List	http://fjnews.fjsen.com/2022-01/02/content_30929058.htm	http://fjnews.fjsen.com/2022-01/02/content_30929058.htm
Fuzhou holds entrepreneur conference: policy 'big gift package' stabilizes enterprises and helps development	http://fjnews.fjsen.com/2022-01/01/content_30928814.htm	http://fjnews.fjsen.com/2022-01/01/content_30928814.htm
Green finance innovation empowers Industrial Bank Ningde Branch to support the landing of China's largest energy storage power station project	http://nd.fjsen.com/2021-12/31/content_30928362.htm	http://nd.fjsen.com/2021-12/31/content_30928362.htm
Leaders of Fuqing City carry out visits to enterprises	http://fq.fjsen.com/2021-12/31/content_30928237.htm	http://fq.fjsen.com/2021-12/31/content_30928237.htm
Fujian Ningde: Striving to Write a New Chapter of High Quality Development	http://yq.fjsen.com/2021-12/31/content_30928011.htm	http://yq.fjsen.com/2021-12/31/content_30928011.htm
Technology empowers the transformation of China Construction Bank Ningde Branch's services for private enterprises from "support" to "support" in the new financial sector	http://nd.fjsen.com/2021-12/31/content_30931029.htm	http://nd.fjsen.com/2021-12/31/content_30931029.htm
The Fuzhou Entrepreneur Conference has sparked a warm response from all sectors of the city	http://fz.fjsen.com/2021-12/31/content_30927864.htm	http://fz.fjsen.com/2021-12/31/content_30927864.htm
Fuzhou: Implementing Standardization Construction of Industrial Parks to Promote High Quality Development of Manufacturing Industry through the Implementation of "Four Highlighting"	http://fz.fjsen.com/2021-12/31/content_30927829.htm	http://fz.fjsen.com/2021-12/31/content_30927829.htm
Industrial Bank Quanzhou Branch: Focus on "Urgent Difficulties, Worries and Hopes" to Do Well in Livelihood Matters	http://www.fjsen.com/content/2021-12/30/content_30927684.htm	http://www.fjsen.com/content/2021-12/30/content_30927684.htm
Adhere to the original intention and gather strength to promote harmony	http://sm.fjsen.com/2021-12/30/content_30926963.htm	http://sm.fjsen.com/2021-12/30/content_30926963.htm
Shaowu: "Science and Technology Special Mission" leads technology to empower "reverse travelers" to achieve breakthrough against the trend	http://np.fjsen.com/2021-12/29/content_30926333.htm	http://np.fjsen.com/2021-12/29/content_30926333.htm
The tide of innovation surges and sails ahead, competing at the right time	http://sm.fjsen.com/2021-12/29/content_30925974.htm	http://sm.fjsen.com/2021-12/29/content_30925974.htm
The first "specialized, refined, innovative" investment fund in the province has been established	http://fjnews.fjsen.com/2021-12/29/content_30925964.htm	http://fjnews.fjsen.com/2021-12/29/content_30925964.htm
Firmly strengthen confidence, bravely become the main force, and vigorously promote the construction of the "Four Anxi" in the new era to a new level	http://www.anxiwenming.cn/2021-12/28/content_30925219.htm	http://www.anxiwenming.cn/2021-12/28/content_30925219.htm
19 projects for people's livelihood in Fuqing are starting construction, sounding the "sound of happiness"	http://fq.fjsen.com/2021-12/27/content_30923879.htm	http://fq.fjsen.com/2021-12/27/content_30923879.htm
Regulations on Railway Safety Management in Fujian Province	http://fjnews.fjsen.com/2021-12/27/content_30924035.htm	http://fjnews.fjsen.com/2021-12/27/content_30924035.htm
Accelerating the Construction of National Green Development Demonstration Zones at a New Starting Point - Interview with Lin Wenbin, Secretary of Nanping Municipal Party Committee	http://fjnews.fjsen.com/2021-12/27/content_30923857.htm	http://fjnews.fjsen.com/2021-12/27/content_30923857.htm
Jiageng Innovation Laboratory: Accelerating the pace of research and development	http://fjnews.fjsen.com/2021-12/26/content_30923615.htm	http://fjnews.fjsen.com/2021-12/26/content_30923615.htm
The discovery of the Kuzhaikeng kiln site in Yongchun advances the history of primitive celadon firing in China by 200 years	http://qz.fjsen.com/2021-12/24/content_30922711.htm	http://qz.fjsen.com/2021-12/24/content_30922711.htm
Minhou has started 7 projects in a concentrated manner, and the "big shot" of science and technology innovation industry has arrived	http://fz.fjsen.com/2021-12/24/content_30922688.htm	http://fz.fjsen.com/2021-12/24/content_30922688.htm
It's closely related to you! Another batch of major projects starting in Fujian! Is it at your doorstep?	http://fjnews.fjsen.com/2021-12/23/content_30922328.htm	http://fjnews.fjsen.com/2021-12/23/content_30922328.htm
Civilized Practice Ignites the Prairie - Overview of Zhangzhou's Work in Creating a National Civilized City in 2021	http://wmf.fjsen.com/2021-12/23/content_30922191.htm	http://wmf.fjsen.com/2021-12/23/content_30922191.htm
The opening of this highway in Fujian is imminent, and there is good news for a batch of transportation projects!	http://fjnews.fjsen.com/2021-12/23/content_30922089.htm	http://fjnews.fjsen.com/2021-12/23/content_30922089.htm
Xiamen deepens higher level of opening-up to the outside world: the doors of the buildings become wider and wider as they open	http://fjnews.fjsen.com/2021-12/23/content_30921455.htm	http://fjnews.fjsen.com/2021-12/23/content_30921455.htm
Fujian Postdoctoral Double Creation Showcases Skills	http://fjnews.fjsen.com/2021-12/23/content_30921441.htm	http://fjnews.fjsen.com/2021-12/23/content_30921441.htm
High quality development in China | A batch of major projects have made new progress, and impressive data shows that China has abundant driving force for high-quality development	http://ar.fjsen.com/2021-12/22/content_30921217.htm	http://ar.fjsen.com/2021-12/22/content_30921217.htm
Development Zone: Strengthening Intellectual Property Protection and Creating a Better Business Environment	http://zzpd.fjsen.com/2021-12/22/content_30917892.htm	http://zzpd.fjsen.com/2021-12/22/content_30917892.htm
The front page of People's Daily praises the 40 year construction of Xiamen Special Economic Zone: the door of the building is getting wider and wider as it opens	http://hk.fjsen.com/2021-12/21/content_30919596.htm	http://hk.fjsen.com/2021-12/21/content_30919596.htm
Accelerate the construction of a modern economic system and promote the modernization process of Fujian Province	http://fjnews.fjsen.com/2021-12/21/content_30918782.htm	http://fjnews.fjsen.com/2021-12/21/content_30918782.htm
Interview with Cui Yonghui, member of the Standing Committee of the Provincial Party Committee and Secretary of the Xiamen Municipal Party Committee	http://fjnews.fjsen.com/2021-12/21/content_30918733.htm	http://fjnews.fjsen.com/2021-12/21/content_30918733.htm
The door of the building becomes wider and wider as it opens	http://www.fjsen.com/2021-12/20/content_30918505.htm	http://www.fjsen.com/2021-12/20/content_30918505.htm
Record of the 40th anniversary of the construction of Xiamen Special Economic Zone: The surging tide of the Lujiang River sings a long song in the vast sea	http://www.fjsen.com/2021-12/20/content_30918208.htm	http://www.fjsen.com/2021-12/20/content_30918208.htm
Fuqing: The world's largest polypropylene production base is rushing to start production	http://fq.fjsen.com/2021-12/20/content_30918068.htm	http://fq.fjsen.com/2021-12/20/content_30918068.htm
Series Report on the 40th Anniversary of Xiamen Special Economic Zone Construction Part 2: A Blueprint to Achieve Cross Island Development with Wide Space	http://fjnews.fjsen.com/2021-12/20/content_30917699.htm	http://fjnews.fjsen.com/2021-12/20/content_30917699.htm
Only 20 nationwide! The only one in Fujian! Liu Mengli, a son of Fu University, was selected as a "role model for college students"	http://i.fjsen.com/2021-12/19/content_30917567.htm	http://i.fjsen.com/2021-12/19/content_30917567.htm
Science and technology, give wings to industrial upgrading and take off	http://qz.fjsen.com/2021-12/18/content_30917266.htm	http://qz.fjsen.com/2021-12/18/content_30917266.htm
Quanzhou accelerates the standardization construction pilot projects of 14 industrial parks to expand new space for high-quality development	http://fjnews.fjsen.com/2021-12/18/content_30917239.htm	http://fjnews.fjsen.com/2021-12/18/content_30917239.htm
Fujian: Special Mission of Science and Technology, Empowering Industrial Upgrading with Soaring Wings	http://fjnews.fjsen.com/2021-12/18/content_30917238.htm	http://fjnews.fjsen.com/2021-12/18/content_30917238.htm
Zhangzhou launches three-year action plan to promote high-quality development of marine economy	http://zzpd.fjsen.com/2021-12/17/content_30916600.htm	http://zzpd.fjsen.com/2021-12/17/content_30916600.htm
Xiamen Innovation and Entrepreneurship Park accelerates the construction of a first-class incubation platform	http://hk.fjsen.com/2021-12/17/content_30916549.htm	http://hk.fjsen.com/2021-12/17/content_30916549.htm
In the beginning of the year, the restructuring and integration of provincial enterprises have broken through the storm	http://hk.fjsen.com/2021-12/17/content_30916535.htm	http://hk.fjsen.com/2021-12/17/content_30916535.htm
Provincial Party Representative Yu Zhou: Continue to polish the "golden signboard" of the Science and Technology Special Mission	http://fjnews.fjsen.com/2021-12/17/content_30916216.htm	http://fjnews.fjsen.com/2021-12/17/content_30916216.htm
Two products from Fuqing City were listed on the list of excellent innovative products for industrial enterprises in Fuzhou City	http://fq.fjsen.com/2021-12/15/content_30914817.htm	http://fq.fjsen.com/2021-12/15/content_30914817.htm
Fuqing Rongqiao Development Zone promotes standardized construction of the park	http://fq.fjsen.com/2021-12/15/content_30914567.htm	http://fq.fjsen.com/2021-12/15/content_30914567.htm
Project acceleration wins final battle	http://fjnews.fjsen.com/2021-12/15/content_30914244.htm	http://fjnews.fjsen.com/2021-12/15/content_30914244.htm
Comprehensively accelerate the construction of a new Fujian in the new development stage	http://fjnews.fjsen.com/2021-12/14/content_30913459.htm	http://fjnews.fjsen.com/2021-12/14/content_30913459.htm
Focusing on enhancing the competitiveness of industrial and supply chains, Fujian accelerates the development of strategic emerging industries	http://yq.fjsen.com/2021-12/13/content_30912639.htm	http://yq.fjsen.com/2021-12/13/content_30912639.htm
Building a modern industrial system and shaping new advantages of 'Made in Fujian'	http://www.fzccpit.org/2021-12/13/content_30912598.htm	http://www.fzccpit.org/2021-12/13/content_30912598.htm
Showcasing Typical Projects and Comparing Results to Learn from Experience - A Side Note on the "Showcasing and Comparing Learning" Activity for Key Project Construction in the City	http://fz.fjsen.com/2021-12/13/content_30912528.htm	http://fz.fjsen.com/2021-12/13/content_30912528.htm
Fuzhou High tech Zone Promotes Enterprises to 'Rise High'	http://fz.fjsen.com/2021-12/13/content_30912497.htm	http://fz.fjsen.com/2021-12/13/content_30912497.htm
Accelerate industrial agglomeration and build development engines	http://sm.fjsen.com/2021-12/13/content_30912418.htm	http://sm.fjsen.com/2021-12/13/content_30912418.htm
Huian: Strive to cultivate new industries and pursue the "new track"	http://huian.fjsen.com/2021-12/12/content_30912273.htm	http://huian.fjsen.com/2021-12/12/content_30912273.htm
Huian County strives to cultivate new industries: chasing the "new track"	http://fjnews.fjsen.com/2021-12/12/content_30912101.htm	http://fjnews.fjsen.com/2021-12/12/content_30912101.htm
Sanming Sanyuan District collaborates with the Southeast Fujian Investment Promotion Group to sign contracts for 10 investment projects in a centralized manner	http://sm.fjsen.com/2021-12/11/content_30911896.htm	http://sm.fjsen.com/2021-12/11/content_30911896.htm
The 2021 Fujian Province Taiwan Youth 'Entrepreneurship Star' has been announced	http://fjnews.fjsen.com/2021-12/11/content_30911771.htm	http://fjnews.fjsen.com/2021-12/11/content_30911771.htm
Fuzhou University collaborates with enterprises to create the first domestic "ammonia hydrogen energy major industry innovation platform"	http://fjnews.fjsen.com/2021-12/10/content_30911682.htm	http://fjnews.fjsen.com/2021-12/10/content_30911682.htm
Fuqing: The Land of Three Blessings Plays a Wonderful Chapter	http://fq.fjsen.com/2021-12/10/content_30911667.htm	http://fq.fjsen.com/2021-12/10/content_30911667.htm
Based on industrial characteristics, build a demonstration base for Sanming's new materials and industrialization industry	http://sm.fjsen.com/2021-12/10/content_30911108.htm	http://sm.fjsen.com/2021-12/10/content_30911108.htm
The 3rd Cross Strait Business Cooperation Forum was held in Fuzhou	http://www.fzccpit.org/2021-12/10/content_30911066.htm	http://www.fzccpit.org/2021-12/10/content_30911066.htm
From January to November this year, 435 key projects in Xiamen completed an investment of 208.78 billion yuan	http://xm.fjsen.com/2021-12/10/content_30910844.htm	http://xm.fjsen.com/2021-12/10/content_30910844.htm
Lianjiang: Those who ride the wind and break through the waves first beat the drum to urge the troops to fight together and overcome difficulties	http://fz.fjsen.com/2021-12/09/content_30910228.htm	http://fz.fjsen.com/2021-12/09/content_30910228.htm
The Third Cross Strait Business Cooperation Forum was held in Rong	http://www.fzccpit.org/2021-12/09/content_30910079.htm	http://www.fzccpit.org/2021-12/09/content_30910079.htm
1958 Industrial Memory Hall and Safety Education Experience Hall take shape	http://sm.fjsen.com/2021-12/09/content_30910022.htm	http://sm.fjsen.com/2021-12/09/content_30910022.htm
Side note on project docking between Sanming City and provincial enterprises	http://sm.fjsen.com/2021-12/09/content_30910009.htm	http://sm.fjsen.com/2021-12/09/content_30910009.htm
Xiamen: Taiwan friendly policies release 'magnetic attraction effect'	http://xm.fjsen.com/2021-12/09/content_30909959.htm	http://xm.fjsen.com/2021-12/09/content_30909959.htm
Fujian selects 10 Taiwanese youth 'entrepreneurial stars'	http://taihai.fjsen.com/2021-12/09/content_30909950.htm	http://taihai.fjsen.com/2021-12/09/content_30909950.htm
Large scale investment attraction attracts good merchants | Sha County, Sanming: 41 signed projects with a total investment of 7.438 billion yuan	http://sm.fjsen.com/2021-12/08/content_30908902.htm	http://sm.fjsen.com/2021-12/08/content_30908902.htm
Minhou: Binjiang New City fully displays project vitality	http://fz.fjsen.com/2021-12/08/content_30909129.htm	http://fz.fjsen.com/2021-12/08/content_30909129.htm
Fujian Rongneng Group: Precise Pulse Monitoring of New Power Equipment to Ensure Power Grid Safety	http://fjnews.fjsen.com/2021-12/08/content_30909032.htm	http://fjnews.fjsen.com/2021-12/08/content_30909032.htm
Standing at the forefront of the tide, breaking through waves, forging ahead, and opening up a new chapter - Accelerating the construction of key projects in Fuqing City	http://fq.fjsen.com/2021-12/07/content_30908226.htm	http://fq.fjsen.com/2021-12/07/content_30908226.htm
Documentary on the Implementation of the Spirit of the Sixth Plenary Session of the 19th Central Committee of the Communist Party of China in Various Regions: Steadfast Steps, Jointly Drawing a New Chapter of High Quality Development	http://ndwm.fjsen.com/2021-12/06/content_30907609.htm	http://ndwm.fjsen.com/2021-12/06/content_30907609.htm
Steadfast in Step, Jointly Drawing a New Chapter of High Quality Development - A Documentary of Implementing the Spirit of the Sixth Plenary Session of the 19th Central Committee of the Communist Party of China in Various Regions	http://www.fjsen.com/2021-12/06/content_30907119.htm	http://www.fjsen.com/2021-12/06/content_30907119.htm
Fuqing: Dancing the Chain to Promote Industry	http://fq.fjsen.com/2021-12/06/content_30907031.htm	http://fq.fjsen.com/2021-12/06/content_30907031.htm
Seize the opportunity to attract the "Golden Phoenix" of the industry to Hangzhou	http://fjnews.fjsen.com/2021-12/05/content_30906330.htm	http://fjnews.fjsen.com/2021-12/05/content_30906330.htm
Dawn Vocational University: Building a "1234" closed-loop talent training quality evaluation system	http://qz.fjsen.com/2021-12/02/content_30905058.htm	http://qz.fjsen.com/2021-12/02/content_30905058.htm
All levels, regions, and departments in Fujian Province conscientiously study and implement the spirit of the 11th Provincial Party Congress	http://ar.fjsen.com/2021-12/02/content_30904956.htm	http://ar.fjsen.com/2021-12/02/content_30904956.htm
ICBC Fujian Branch seizes new opportunities for industrial development, gathers strength to build a leading manufacturing industry, and forcefully	http://money.fjsen.com/2021-12/02/content_30904787.htm	http://money.fjsen.com/2021-12/02/content_30904787.htm
Embarking on a new journey and building a growth pole - the report of the 11th Provincial Party Congress has sparked a warm response among the cadres and masses in Ningde City	http://nd.fjsen.com/2021-12/02/content_30904302.htm	http://nd.fjsen.com/2021-12/02/content_30904302.htm
We have done these things to improve the professional ability of special equipment safety supervision personnel in the whole province	http://www.fjsen.com/zhuanti/2021-11/30/content_30902819.htm	http://www.fjsen.com/zhuanti/2021-11/30/content_30902819.htm
The next step in building the Fuzhou metropolitan area is: co construction, co governance, shared urbanization, and shared home	http://fz.fjsen.com/2021-11/30/content_30902363.htm	http://fz.fjsen.com/2021-11/30/content_30902363.htm
Sanming City has been listed as a key city in the revolutionary old areas	http://sm.fjsen.com/2021-11/30/content_30902123.htm	http://sm.fjsen.com/2021-11/30/content_30902123.htm
Seeking development and talking about the future, representatives are discussing "high-quality development surpassing"	http://women.fjsen.com/2021-11/29/content_30901883.htm	http://women.fjsen.com/2021-11/29/content_30901883.htm
Hold high the banner, remember the entrustment, bravely shoulder the mission, forge ahead and work hard to write the chapter of building a socialist modern country in an all-round way in Fujian -- Summary of the report made by Yin Li on behalf of the 10th Fujian Provincial Committee of the CPC	http://women.fjsen.com/2021-11/29/content_30901873.htm	http://women.fjsen.com/2021-11/29/content_30901873.htm
The 11th Party Congress of Fujian Province Closing | Party Representatives and Netizens @ 2026 Message for New Future Development	http://fjnews.fjsen.com/2021-11/29/content_30901830.htm	http://fjnews.fjsen.com/2021-11/29/content_30901830.htm
Representatives of the Provincial Party Congress hotly discuss the "Five Highlighting": leveraging advantages, focusing on key areas, forging ahead with reform and courage	http://ar.fjsen.com/2021-11/29/content_30901622.htm	http://ar.fjsen.com/2021-11/29/content_30901622.htm
Quanzhou delegation discusses the report of the Provincial Party Congress	http://qz.fjsen.com/2021-11/29/content_30901135.htm	http://qz.fjsen.com/2021-11/29/content_30901135.htm
Building the Core Area of Regional Innovation Center - Interview with Representative Zhuang Rongliang	http://fjnews.fjsen.com/2021-11/28/content_30900642.htm	http://fjnews.fjsen.com/2021-11/28/content_30900642.htm
Fujian: Anchoring the modernization of the economic system and achieving "industrial excellence" to a new level	http://fjnews.fjsen.com/2021-11/27/content_30900381.htm	http://fjnews.fjsen.com/2021-11/27/content_30900381.htm
Intensive Reading Report | To promote high-quality economic development and regional coordinated development in Fujian, each city (district) should do so	http://fjnews.fjsen.com/2021-11/26/content_30900342.htm	http://fjnews.fjsen.com/2021-11/26/content_30900342.htm
Huian County promotes high-quality economic development with "1234" as the main line	http://huian.fjsen.com/2021-11/26/content_30900249.htm	http://huian.fjsen.com/2021-11/26/content_30900249.htm
Huian County strives to create a "Huian Model" for green development of chemical industrial parks	http://huian.fjsen.com/2021-11/26/content_30900247.htm	http://huian.fjsen.com/2021-11/26/content_30900247.htm
The Special Plan for the Construction of a Strong Maritime Province in Fujian Province during the 14th Five Year Plan Period has been issued	http://ar.fjsen.com/2021-11/26/content_30900219.htm	http://ar.fjsen.com/2021-11/26/content_30900219.htm
Fuqing accelerates the construction of a modern and international port city	http://www.fzccpit.org/2021-11/26/content_30899726.htm	http://www.fzccpit.org/2021-11/26/content_30899726.htm
New blueprint depicts a beautiful future for 'Maritime Fujian'	http://fjnews.fjsen.com/2021-11/26/content_30899360.htm	http://fjnews.fjsen.com/2021-11/26/content_30899360.htm
Industrial Bank and Fujian Federation of Industry and Commerce signed a strategic cooperation agreement to jointly build an exclusive service platform for Fujian merchants	http://np.fjsen.com/2021-11/25/content_30899073.htm	http://np.fjsen.com/2021-11/25/content_30899073.htm
How will Fujian's marine economy develop in the next five years? This' Plan 'has been arranged	http://fjnews.fjsen.com/2021-11/25/content_30899139.htm	http://fjnews.fjsen.com/2021-11/25/content_30899139.htm
Focus on the Two Sessions in Quanzhou County, City and District: Huian: Building a Modern Industrial and Trade Port Tourism City along the Maritime Silk Road	http://qz.fjsen.com/2022-12/29/content_31216091.htm	http://qz.fjsen.com/2022-12/29/content_31216091.htm
The provincial government held an executive meeting to study the application of Xiamen Marine High tech Industrial Park to establish a provincial-level high-tech zone and other matters	http://fjnews.fjsen.com/2022-12/23/content_31212100.htm	http://fjnews.fjsen.com/2022-12/23/content_31212100.htm
Exclusive interview with Ye Renyou: Creating a highland for gathering advanced manufacturing talents	http://fq.fjsen.com/2022-12/19/content_31209277.htm	http://fq.fjsen.com/2022-12/19/content_31209277.htm
Three party observation of culture and tourism | A strategic chess game driven by major cultural industry projects	http://travel.fjsen.com/2022-12/02/content_31196184.htm	http://travel.fjsen.com/2022-12/02/content_31196184.htm
The Milky Way shines brightly and cannot exhaust the elegance of officials	http://fjnews.fjsen.com/2022-11/25/content_31189094.htm	http://fjnews.fjsen.com/2022-11/25/content_31189094.htm
The Historical Echoes of Houguan Culture	http://fjnews.fjsen.com/2022-11/25/content_31188617.htm	http://fjnews.fjsen.com/2022-11/25/content_31188617.htm
The Ocean Research Center of the Ministry of Natural Resources has settled in Zhangzhou High tech Zone	http://zzpd.fjsen.com/2022-11/22/content_31201105.htm	http://zzpd.fjsen.com/2022-11/22/content_31201105.htm
Industrial Bank Zhangzhou Branch: Study and implement the spirit of the 20th National Congress and bravely become the main force of regional finance	http://zzpd.fjsen.com/2022-11/17/content_31198427.htm	http://zzpd.fjsen.com/2022-11/17/content_31198427.htm
Study and implement the spirit of the 20th National Congress and bravely become the main force of regional finance	http://money.fjsen.com/2022-11/16/content_31180548.htm	http://money.fjsen.com/2022-11/16/content_31180548.htm
A thousand year old marquis with a long cultural heritage	http://travel.fjsen.com/2022-11/16/content_31180450.htm	http://travel.fjsen.com/2022-11/16/content_31180450.htm
China Golden Rooster&Hundred Flowers Film Festival in 2022	http://fjnews.fjsen.com/2022-11/13/content_31177542.htm	http://fjnews.fjsen.com/2022-11/13/content_31177542.htm
The 2nd National Finals of the Veterans Entrepreneurship and Innovation Competition (Online) has begun	http://www.fjsen.com/zhuanti/2022-11/03/content_31170291.htm	http://www.fjsen.com/zhuanti/2022-11/03/content_31170291.htm
Accelerate the establishment of provincial-level marine high-tech industrial parks	http://fjnews.fjsen.com/2022-11/01/content_31167513.htm	http://fjnews.fjsen.com/2022-11/01/content_31167513.htm
The meeting between the new Standing Committee of the Political Bureau of the Communist Party of China Central Committee and Chinese and foreign journalists has sparked a warm response in Fujian	http://www.fjsen.com/zhuanti/2022-10/24/content_31161641.htm	http://www.fjsen.com/zhuanti/2022-10/24/content_31161641.htm
The meeting between the new Standing Committee of the Political Bureau of the Communist Party of China Central Committee and Chinese and foreign journalists has sparked a warm response in Fujian Province	http://women.fjsen.com/2022-10/24/content_31161819.htm	http://women.fjsen.com/2022-10/24/content_31161819.htm
Fuzhou: With the arrival of the Science and Technology Bureau, planting and breeding have become more ecological	http://fz.fjsen.com/2022-10/24/content_31161097.htm	http://fz.fjsen.com/2022-10/24/content_31161097.htm
Popularity is overwhelming! The audience warmly praised the Fujian exhibition area	http://wmf.fjsen.com/2022-10/03/content_31146388.htm	http://wmf.fjsen.com/2022-10/03/content_31146388.htm
Notes on the Fujian Exhibition Area of the "Striving for a New Era" Theme Achievement Exhibition	http://wmf.fjsen.com/2022-10/02/content_31145921.htm	http://wmf.fjsen.com/2022-10/02/content_31145921.htm
Fuzhou held a conference to promote the construction of a highland for marine economic science and technology innovation	http://www.fzccpit.org/2022-09/29/content_31144196.htm	http://www.fzccpit.org/2022-09/29/content_31144196.htm
Xiamen: Let the ocean industry and spiritual civilization achieve a two-way journey	http://wmf.fjsen.com/2022-09/29/content_31143632.htm	http://wmf.fjsen.com/2022-09/29/content_31143632.htm
Huian: Rural areas are thriving with abundant scenery and strong vitality for revitalization	http://qz.fjsen.com/2022-09/22/content_31138445.htm	http://qz.fjsen.com/2022-09/22/content_31138445.htm
Fuzhou releases a batch of personnel appointment and removal notices	http://fz.fjsen.com/2022-09/17/content_31134165.htm	http://fz.fjsen.com/2022-09/17/content_31134165.htm
Academicians and experts gather together! Jointly discuss the revitalization of Fuzhou through science and education!	http://www.fzccpit.org/2022-09/16/content_31133408.htm	http://www.fzccpit.org/2022-09/16/content_31133408.htm
9 schools in Pingtan selected for the second batch of provincial-level "Safe Campus"	http://ptxw.fjsen.com/2022-09/14/content_31131246.htm	http://ptxw.fjsen.com/2022-09/14/content_31131246.htm
Social Responsibility | Fujian Rural Credit Cooperative: Leveraging the "Four Major Economies" to Promote High Quality Development	http://www.fjsen.com/zhuanti/2022-09/05/content_31124405.htm	http://www.fjsen.com/zhuanti/2022-09/05/content_31124405.htm
Zhao'an enterprise selected for the list of technology-based small and medium-sized enterprises in Fujian Province	http://zzpd.fjsen.com/2022-09/04/content_31122031.htm	http://zzpd.fjsen.com/2022-09/04/content_31122031.htm
The press conference on the theme of "China's Ten Years, Fujian" has sparked a warm response among overseas Chinese	http://overseas.fjsen.com/2022-09/02/content_31122575.htm	http://overseas.fjsen.com/2022-09/02/content_31122575.htm
The Communist Party of China Fujian Provincial Committee held a press conference on the theme of "China's Ten Years, Fujian"	http://www.npwyw.com/2022-08/31/content_31149153.htm	http://www.npwyw.com/2022-08/31/content_31149153.htm
Ten Years of Struggle and Ten Years of Brilliance - Counting the Past Ten Years in Fujian	http://wmf.fjsen.com/2022-08/31/content_31120524.htm	http://wmf.fjsen.com/2022-08/31/content_31120524.htm
Striving to turn the grand blueprint of the new Fujian into a beautiful reality - the main speech at the "China's Decade · Fujian" themed press conference of the Fujian Provincial Committee of the Communist Party of China	http://fjnews.fjsen.com/2022-08/31/content_31120229.htm	http://fjnews.fjsen.com/2022-08/31/content_31120229.htm
Record of the Communist Party of China Fujian Provincial Committee's "China's Ten Years, Fujian" Theme Press Conference Answering Journalists' Questions	http://fjnews.fjsen.com/2022-08/31/content_31120230.htm	http://fjnews.fjsen.com/2022-08/31/content_31120230.htm
In the past decade, the R&D investment in Fujian Province has increased by 2.1 times, with an average annual growth rate of 15.2%	http://fjnews.fjsen.com/2022-08/30/content_31120206.htm	http://fjnews.fjsen.com/2022-08/30/content_31120206.htm
The press conference on the theme of "China's Ten Years, Fujian" was held: comprehensively promoting high-quality development and striving to turn the grand blueprint of the new Fujian into a beautiful reality	http://fjnews.fjsen.com/2022-08/30/content_31120157.htm	http://fjnews.fjsen.com/2022-08/30/content_31120157.htm
A symposium was held between academicians, experts, and leaders of the Party and government of Fuzhou City to create a first-class environment, strengthen the attraction of intelligence and talent, promote technological innovation, empower high-quality development, and hold discussions	http://www.fzccpit.org/2022-08/26/content_31117472.htm	http://www.fzccpit.org/2022-08/26/content_31117472.htm
Ping Shan Jun 丨 For a Source of Living Water - Financial 'Living Water' Empowers Fujian's Real Economy	http://www.fjsen.com/2022-08/25/content_31116591.htm	http://www.fjsen.com/2022-08/25/content_31116591.htm
Inheriting and promoting the 'Jinjiang Experience', bravely standing at the forefront and writing a new chapter	http://fjnews.fjsen.com/2022-08/20/content_31113077.htm	http://fjnews.fjsen.com/2022-08/20/content_31113077.htm
Inheriting and promoting the "Jinjiang Experience" and supporting Quanzhou's construction of a "Maritime Silk Road City" in the 21st century - A spokesperson from the Fujian Provincial Development and Reform Commission answered questions from reporters	http://fjnews.fjsen.com/2022-08/18/content_31111688.htm	http://fjnews.fjsen.com/2022-08/18/content_31111688.htm
Inheriting and promoting the "Jinjiang Experience" and supporting Quanzhou's construction of a "Maritime Silk Road City" in the 21st century - Relevant person in charge of the Provincial Development and Reform Commission answers questions from reporters	http://fjnews.fjsen.com/2022-08/18/content_31111685.htm	http://fjnews.fjsen.com/2022-08/18/content_31111685.htm
Inheriting and promoting the "Jinjiang Experience" and supporting Quanzhou's construction of a "Maritime Silk Road City" in the 21st century - Relevant person in charge of the Provincial Development and Reform Commission answers questions from reporters	http://www.518fuzhou.com/2022-08/18/content_31111591.htm	http://www.518fuzhou.com/2022-08/18/content_31111591.htm
Inheriting and promoting the 'Jinjiang Experience' to support Quanzhou's construction of a 21st century 'Maritime Silk Road City'	http://money.fjsen.com/2022-08/18/content_31111562.htm	http://money.fjsen.com/2022-08/18/content_31111562.htm
Fuzhou: Innovation, Creating the Most Distinctive Urban Characteristics	http://fz.fjsen.com/2022-08/17/content_31110773.htm	http://fz.fjsen.com/2022-08/17/content_31110773.htm
Innovation, forging the most distinctive urban characteristics. Over the past decade, Fuzhou has deeply implemented an innovation driven development strategy	http://www.fzccpit.org/2022-08/17/content_31110601.htm	http://www.fzccpit.org/2022-08/17/content_31110601.htm
Leveraging the advantages of location to enhance the cultural and tourism economy	http://travel.fjsen.com/2022-08/17/content_31110502.htm	http://travel.fjsen.com/2022-08/17/content_31110502.htm
Leveraging the advantages of location to strengthen the cultural and tourism economy - Interview with Lian Xianghong, Secretary of the Hanjiang District Committee and Secretary of the Party Working Committee of Putian High tech Industrial Development Zone	http://fjnews.fjsen.com/2022-08/17/content_31110279.htm	http://fjnews.fjsen.com/2022-08/17/content_31110279.htm
Inheriting and promoting the 'Jinjiang experience', making every effort to promote high-quality development	http://money.fjsen.com/2022-08/16/content_31109458.htm	http://money.fjsen.com/2022-08/16/content_31109458.htm
Inheriting and promoting the 'Jinjiang experience', Quanzhou's county-level economy achieves multi-point flowering	http://fjnews.fjsen.com/2022-08/15/content_31108774.htm	http://fjnews.fjsen.com/2022-08/15/content_31108774.htm
[Min Shan Min Shui Wu Hua Xin · Extraordinary Ten Years] Gratitude and progress, blessed state with many blessings	http://wmf.fjsen.com/2022-08/08/content_31103769.htm	http://wmf.fjsen.com/2022-08/08/content_31103769.htm
Jinjiang: Deepening the Integration of Industry, City, and People to Lead the Way of County Development	http://qz.fjsen.com/2022-08/03/content_31099898.htm	http://qz.fjsen.com/2022-08/03/content_31099898.htm
The 'digital' gold mining is at the right time	http://money.fjsen.com/2022-08/03/content_31099904.htm	http://money.fjsen.com/2022-08/03/content_31099904.htm
Putian: "Digital" Gold Mining at the Right Time	http://fjnews.fjsen.com/2022-08/03/content_31099775.htm	http://fjnews.fjsen.com/2022-08/03/content_31099775.htm
Creating a new "engine" for Fuqing's economy - Significant achievements have been made in the digitalization construction of Fuqing City	http://fq.fjsen.com/2022-07/28/content_31095480.htm	http://fq.fjsen.com/2022-07/28/content_31095480.htm
The unveiling of the Shenzhen Hong Kong Macao Science and Technology Achievement (Changle) Three Innovation Base	http://fz.fjsen.com/2022-07/25/content_31092126.htm	http://fz.fjsen.com/2022-07/25/content_31092126.htm
The largest craft brewery in the Asia Pacific region has been built and put into operation in Putian	http://pt.fjsen.com/xw/2022-07/22/content_31090815.htm	http://pt.fjsen.com/xw/2022-07/22/content_31090815.htm
Fujian Province launches the third batch of "Entrepreneurial Star" and "Innovation Star" talent selection	http://fjnews.fjsen.com/2022-07/19/content_31087446.htm	http://fjnews.fjsen.com/2022-07/19/content_31087446.htm
Hanjiang: Cross border integration and development of cultural and tourism industries to create the "Five Color Cultural and Tourism" brand	http://www.fjsen.com/zhuanlan/2022-07/14/content_31186927.htm	http://www.fjsen.com/zhuanlan/2022-07/14/content_31186927.htm
Fujian Provincial Party Secretary Yin Li: Promote the fine tradition of "immediate action and practical work", focus on efficiency, effectiveness and benefits, and promote high-quality development	http://wmf.fjsen.com/2022-07/14/content_31084048.htm	http://wmf.fjsen.com/2022-07/14/content_31084048.htm
Yin Li published a signed article in the Study Times, promoting the fine tradition of "getting things done right away and working hard", emphasizing efficiency, effectiveness, and promoting high-quality development	http://fjjj.fjsen.com/2022-07/13/content_31084514.htm	http://fjjj.fjsen.com/2022-07/13/content_31084514.htm
Guided by reform, Quanzhou accelerates the process of "strengthening production and revitalizing the city"	http://fjnews.fjsen.com/2022-07/12/content_31082192.htm	http://fjnews.fjsen.com/2022-07/12/content_31082192.htm
Fujian Province widely solicits financing needs from technology-based enterprises	http://fjnews.fjsen.com/2022-07/04/content_31076007.htm	http://fjnews.fjsen.com/2022-07/04/content_31076007.htm
Fujian: Empowering and Stimulating the "Driving Force" of Technological Achievement Transformation	http://fjnews.fjsen.com/2022-06/28/content_31071605.htm	http://fjnews.fjsen.com/2022-06/28/content_31071605.htm
Xi Jinping in Fujian (30th): 'Comrade Xi Jinping's perspective on issues is grand'	http://wmf.fjsen.com/2022-06/21/content_31066174.htm	http://wmf.fjsen.com/2022-06/21/content_31066174.htm
Hai Chuang Hui: Innovative achievements "go global" on the main battlefield of development	http://www.fjsen.com/zhuanti/2022-06/18/content_31065644.htm	http://www.fjsen.com/zhuanti/2022-06/18/content_31065644.htm
Fujian launches the "Quality and Technology Assistance" campaign to enhance the quality and strengthen enterprises	http://www.fjsen.com/zhuanti/2022-06/16/content_31063026.htm	http://www.fjsen.com/zhuanti/2022-06/16/content_31063026.htm
[Review] Fujian State owned Assets and State owned Enterprises Showcase Technological Innovation Achievements at the Hai Chuang Conference	http://www.fjsen.com/zhuanti/2022-06/14/content_31060500.htm	http://www.fjsen.com/zhuanti/2022-06/14/content_31060500.htm
2022 Fishery Expo opens, tasting and appreciating "fishing" awaits you	http://fjnews.fjsen.com/2022-06/10/content_31058287.htm	http://fjnews.fjsen.com/2022-06/10/content_31058287.htm
Shanhai Fusion 2022 Fishery Expo and Mushroom Expo will open tomorrow. The reporter will take you to explore the museum in advance	http://fjnews.fjsen.com/2022-06/09/content_31057391.htm	http://fjnews.fjsen.com/2022-06/09/content_31057391.htm
Fuzhou: Continuing to strive and accelerating the construction of a modern international city	http://www.fzccpit.org/2022-06/07/content_31054438.htm	http://www.fzccpit.org/2022-06/07/content_31054438.htm
Pingtan: Timely Rain to Relieve Difficulties and Help Enterprises Get Out of the 'Cold Spring'	http://ptxw.fjsen.com/2022-06/06/content_31053563.htm	http://ptxw.fjsen.com/2022-06/06/content_31053563.htm
Xiamen's selection of popular science research masterpieces will be promoted nationwide	http://xm.fjsen.com/2022-06/01/content_31049848.htm	http://xm.fjsen.com/2022-06/01/content_31049848.htm
2022 Project Construction Tour Concentrated Interview Activity Enters Anxi Dehua	http://qz.fjsen.com/2022-05/26/content_31044410.htm	http://qz.fjsen.com/2022-05/26/content_31044410.htm
Pioneer in Entrepreneurship: Lin Yexiong: Plant Protection Drones Help Increase Production and Income	http://www.fjsen.com/zhuanti/2022-05/05/content_31025763.htm	http://www.fjsen.com/zhuanti/2022-05/05/content_31025763.htm
'High tech Blue' activates the new engine of marine economy. Fuzhou accelerates the promotion of high-end, intelligent and clustered modern marine engineering equipment industry	http://www.518fuzhou.com/2022-04/27/content_31020109.htm	http://www.518fuzhou.com/2022-04/27/content_31020109.htm
Fuzhou accelerates the promotion of high-end, intelligent and clustered modern marine engineering equipment industry	http://fz.fjsen.com/2022-04/27/content_31020015.htm	http://fz.fjsen.com/2022-04/27/content_31020015.htm
Drawing a blueprint to the end, forging ahead and creating a new chapter, seizing the opportunity to accelerate the construction of a modern international city	http://fjnews.fjsen.com/2022-04/26/content_31018823.htm	http://fjnews.fjsen.com/2022-04/26/content_31018823.htm
Fujian Province accelerates high-quality development of biopharmaceutical industry, answers questions from reporters at press conference	http://fjnews.fjsen.com/2022-04/21/content_31015017.htm	http://fjnews.fjsen.com/2022-04/21/content_31015017.htm
Young Siming sets sail with determination to lead the way and stand at the forefront of the trend	http://xm.fjsen.com/2022-04/21/content_31017139.htm	http://xm.fjsen.com/2022-04/21/content_31017139.htm
Establish a big food concept and make the 'Chinese rice bowl' better and healthier	http://www.fjsen.com/2022-04/20/content_31013131.htm	http://www.fjsen.com/2022-04/20/content_31013131.htm
Xiamen: Rising towards the sea, with surging 'blue kinetic energy'	http://fjnews.fjsen.com/2022-04/16/content_31009957.htm	http://fjnews.fjsen.com/2022-04/16/content_31009957.htm
Fuda Beidou independently developed Beidou satellite based multi network fusion application platform	http://www.fzccpit.org/2022-04/13/content_31006970.htm	http://www.fzccpit.org/2022-04/13/content_31006970.htm
Anti epidemic oath from private enterprises in Jinjiang: We will never back down when the city needs it	http://qz.fjsen.com/2022-04/07/content_31002452.htm	http://qz.fjsen.com/2022-04/07/content_31002452.htm
Chairman of the Board of Directors Xi Jinping encourages us to promote the spirit of Jiageng - Xi Jinping and college students	http://www.fjsen.com/2022-03/30/content_30995609.htm	http://www.fjsen.com/2022-03/30/content_30995609.htm
Pingshan Jun | Listen, the echoes of spring	http://fjnews.fjsen.com/2022-03/26/content_30992019.htm	http://fjnews.fjsen.com/2022-03/26/content_30992019.htm
Pioneer in Entrepreneurship: Zhou Honglei's "Road to Insect Farming"	http://www.fjsen.com/zhuanti/2022-03/25/content_30991742.htm	http://www.fjsen.com/zhuanti/2022-03/25/content_30991742.htm
Grateful for this year of progress | Fuzhou High tech Zone: Fulfilling the trust and high expectations, bravely forging ahead on the path of leading the way	http://fz.fjsen.com/2022-03/25/content_30991559.htm	http://fz.fjsen.com/2022-03/25/content_30991559.htm
Fuzhou High tech Zone lives up to its high expectations and bravely takes the lead in the industry	http://www.fzccpit.org/2022-03/25/content_30991290.htm	http://www.fzccpit.org/2022-03/25/content_30991290.htm
Fuzhou: Innovative and Dynamic Industries Upgrade Again	http://hk.fjsen.com/2022-03/22/content_30988782.htm	http://hk.fjsen.com/2022-03/22/content_30988782.htm
Liu Jianyang, deputy to the National People's Congress, member of the Standing Committee of the Fujian Provincial Party Committee, and secretary of the Quanzhou Municipal Party Committee: Inherit and carry forward the "Jinjiang experience", and be brave to promote high-quality development in an all-round way and surpass the main force	http://qz.fjsen.com/2022-03/09/content_30977980.htm	http://qz.fjsen.com/2022-03/09/content_30977980.htm
Industrial Bank Zhangzhou Branch: "Financing+Integrated Intelligence+Inclusive" Helps Achieve a "Good Start"	http://zzpd.fjsen.com/2022-03/04/content_30998954.htm	http://zzpd.fjsen.com/2022-03/04/content_30998954.htm
Embrace all rivers, gather talents, build dreams, integrate jade and create the future - Overview of Fuqing City's promotion of talent work in the new era	http://fq.fjsen.com/2022-03/02/content_30971905.htm	http://fq.fjsen.com/2022-03/02/content_30971905.htm
Fujian's first customized urban satellite launched into space	http://overseas.fjsen.com/2022-02/28/content_30969552.htm	http://overseas.fjsen.com/2022-02/28/content_30969552.htm
The launch of the "Xiamen Tianwei Technology One" pilot satellite provides guarantees for urban construction	http://xm.fjsen.com/2022-02/28/content_30969263.htm	http://xm.fjsen.com/2022-02/28/content_30969263.htm
Lan Pingyong, deputy to the National People's Congress: "Tax services help enterprises, Hongdong feeds back and benefits people, and jointly promote the development of blue ocean economy and industry"	http://www.fjsen.com/content/2022-02/25/content_30968766.htm	http://www.fjsen.com/content/2022-02/25/content_30968766.htm
Government Work Report of Quanzhou City in 2022	http://qz.fjsen.com/2022-02/15/content_30960373.htm	http://qz.fjsen.com/2022-02/15/content_30960373.htm
Integrating into the new pattern of development, ensuring people's livelihood and promoting harmony -- A documentary report on the high-quality development of China Life Insurance Fujian Branch to help rural revitalization	http://money.fjsen.com/2022-02/14/content_30959651.htm	http://money.fjsen.com/2022-02/14/content_30959651.htm
Industrial Bank Quanzhou Branch supports the debut of "Made in Quanzhou" at the Winter Olympics	http://qz.fjsen.com/2022-02/10/content_30957339.htm	http://qz.fjsen.com/2022-02/10/content_30957339.htm
Report on the Implementation of Fujian Province's 2021 Budget and the Draft Budget for 2022	http://fjnews.fjsen.com/2022-02/10/content_30957204.htm	http://fjnews.fjsen.com/2022-02/10/content_30957204.htm
Quanzhou Taiwan Business District Builds a Smart Supervision Service Platform for 'Pro Clean Homeland'	http://overseas.fjsen.com/2022-02/10/content_30957055.htm	http://overseas.fjsen.com/2022-02/10/content_30957055.htm
Report of the Secretary of the Party Committee (Party Group) of the City on the Work of Grassroots Party Building (Excerpted) (Part One)	http://fz.fjsen.com/2022-01/28/content_30949940.htm	http://fz.fjsen.com/2022-01/28/content_30949940.htm
What are the highlights and how should we proceed with the planned tasks—— Interpretation of the Implementation Status of the 2021 Plan and the Draft Report of the 2022 Plan	http://fjnews.fjsen.com/2022-01/23/content_30944922.htm	http://fjnews.fjsen.com/2022-01/23/content_30944922.htm
Remembering the instructions and forging ahead in the new development stage, the construction of New Fujian has achieved new results - focusing on the government work report	http://fjnews.fjsen.com/2022-01/23/content_30944920.htm	http://fjnews.fjsen.com/2022-01/23/content_30944920.htm
Municipal Market Supervision Administration: Polishing the 'Golden Brand' and Building a Quality Highland	http://nd.fjsen.com/2022-01/22/content_30944873.htm	http://nd.fjsen.com/2022-01/22/content_30944873.htm
These "C-digit" high-frequency words take you to the key points of the Fujian government work report	http://fjnews.fjsen.com/2022-01/22/content_30944789.htm	http://fjnews.fjsen.com/2022-01/22/content_30944789.htm
Representatives and members of the Provincial People's Congress and the Chinese People's Political Consultative Conference focus on expanding, optimizing, and strengthening Fuzhou, and provide suggestions and strategies	http://fz.fjsen.com/2022-01/22/content_30944598.htm	http://fz.fjsen.com/2022-01/22/content_30944598.htm
Fuzhou, raising the dragon head	http://fz.fjsen.com/2022-01/21/content_30943719.htm	http://fz.fjsen.com/2022-01/21/content_30943719.htm
Industrial and Economic Window | Agricultural Development Bank and Pingtan Shifa Group signed a strategic cooperation agreement	http://ptxw.fjsen.com/2022-01/18/content_30941101.htm	http://ptxw.fjsen.com/2022-01/18/content_30941101.htm
Xiamen Torch High tech Zone: Precise Talent Attraction, Innovative Talent Cultivation, and Warm Talent Retention - Building the "First Resource" for Innovation Driven Development	http://fjnews.fjsen.com/2022-01/17/content_30939139.htm	http://fjnews.fjsen.com/2022-01/17/content_30939139.htm
The online voting for the selection of the most beautiful women in science and technology has ended and will soon enter the expert evaluation stage	http://fz.fjsen.com/2022-01/12/content_30936293.htm	http://fz.fjsen.com/2022-01/12/content_30936293.htm
Interview with Cui Yonghui, member of the Standing Committee of the Fujian Provincial Party Committee and Secretary of the Xiamen Municipal Party Committee: bravely standing at the forefront and striving to take the lead in realizing socialist modernization	http://fjnews.fjsen.com/2022-01/10/content_30934236.htm	http://fjnews.fjsen.com/2022-01/10/content_30934236.htm
The work report of Xiamen Municipal Government specifies ten key areas of work for this year	http://xm.fjsen.com/2022-01/08/content_30933376.htm	http://xm.fjsen.com/2022-01/08/content_30933376.htm
To achieve the goal of increasing regional GDP by around 8%, Fuzhou plans to do so this year	http://fz.fjsen.com/2022-01/08/content_30933349.htm	http://fz.fjsen.com/2022-01/08/content_30933349.htm
Representatives and members of the Xiamen Two Sessions voice their opinions and suggestions to seek common development	http://xm.fjsen.com/2022-01/08/content_30933312.htm	http://xm.fjsen.com/2022-01/08/content_30933312.htm
GDP has exceeded 500 billion yuan! Interpretation of the 2022 Zhangzhou Municipal Government Work Report	http://zzpd.fjsen.com/2022-01/05/content_30930794.htm	http://zzpd.fjsen.com/2022-01/05/content_30930794.htm
Quan's answer sheet: A good start to the first year - A review of major events in the political and livelihood fields of Quanzhou in 2021	http://qz.fjsen.com/2022-01/05/content_30930693.htm	http://qz.fjsen.com/2022-01/05/content_30930693.htm
Fuzhou: The added value of the city's digital economy will exceed 650 billion yuan next year	http://fz.fjsen.com/2021-12/31/content_30928469.htm	http://fz.fjsen.com/2021-12/31/content_30928469.htm
Cold Wave 'Frozen', True Banyan City 'Warmth' Takes over	http://fz.fjsen.com/2021-12/28/content_30925066.htm	http://fz.fjsen.com/2021-12/28/content_30925066.htm
The First Session of the Fifth People's Congress of Xiang'an District, Xiamen was held on the 26th	http://xm.fjsen.com/2021-12/27/content_30923872.htm	http://xm.fjsen.com/2021-12/27/content_30923872.htm
Grasp Major Projects and Stabilize Economic Growth - Our Province Holds Fourth Quarter Major Project Concentrated Construction Activities	http://fjnews.fjsen.com/2021-12/24/content_30922435.htm	http://fjnews.fjsen.com/2021-12/24/content_30922435.htm
Fujian: Striving to Write a New Chapter in Reform and Opening Up	http://www.fjsen.com/2021-12/23/content_30921739.htm	http://www.fjsen.com/2021-12/23/content_30921739.htm
Liu Jianyang, member of the Standing Committee of the Provincial Party Committee and Secretary of the Quanzhou Municipal Party Committee, accepted an interview: Inheriting and promoting the "Jinjiang Experience" and accelerating the construction of a "Maritime Silk Road City" in the 21st century	http://qz.fjsen.com/2021-12/22/content_30920737.htm	http://qz.fjsen.com/2021-12/22/content_30920737.htm
Interview with Liu Jianyang, member of the Standing Committee of the Provincial Party Committee and Secretary of the Quanzhou Municipal Party Committee: Inheriting and Promoting the "Jinjiang Experience" and Accelerating the Construction of a 21st Century "Maritime Silk Road City"	http://fjnews.fjsen.com/2021-12/22/content_30920260.htm	http://fjnews.fjsen.com/2021-12/22/content_30920260.htm
General Secretary Xi Jinping's congratulatory letter has sparked a warm response in Fujian: standing at the forefront of the tide with courage and perseverance, making new contributions on the new journey	http://fjnews.fjsen.com/2021-12/22/content_30920258.htm	http://fjnews.fjsen.com/2021-12/22/content_30920258.htm
Opinions of the Fujian Provincial Committee of the Communist Party of China and the Fujian Provincial People's Government on Supporting Xiamen to Build a High Quality Development Leading Demonstration Zone	http://fjnews.fjsen.com/2021-12/21/content_30918726.htm	http://fjnews.fjsen.com/2021-12/21/content_30918726.htm
Summary of the Special Seminar on Learning and Implementing the Spirit of the Sixth Plenary Session of the 19th Central Committee of the Communist Party of China for Provincial Management Cadres	http://dsxxjy.fjsen.com/2021-12/20/content_30918180.htm	http://dsxxjy.fjsen.com/2021-12/20/content_30918180.htm
How to build an innovation leading zone in Mawei? CPPCC members enthusiastically offer suggestions	http://fz.fjsen.com/2021-12/20/content_30917775.htm	http://fz.fjsen.com/2021-12/20/content_30917775.htm
Offshore wind power giant completes penetration in Fuzhou	http://fjnews.fjsen.com/2021-12/19/content_30917466.htm	http://fjnews.fjsen.com/2021-12/19/content_30917466.htm
Advancing for 40 Years, Building Dreams for a New Era - One of the Series Reports on the 40th Anniversary of Xiamen Special Economic Zone Construction	http://fjnews.fjsen.com/2021-12/19/content_30917460.htm	http://fjnews.fjsen.com/2021-12/19/content_30917460.htm
Facing the sea, Fujian rushes forward with waves on the sea	http://hk.fjsen.com/2021-12/17/content_30916533.htm	http://hk.fjsen.com/2021-12/17/content_30916533.htm
Quanzhou City held a meeting of leading cadres	http://qz.fjsen.com/2021-12/13/content_30912500.htm	http://qz.fjsen.com/2021-12/13/content_30912500.htm
Proactively integrate into the overall development situation and fully promote the "Haisi" brand	http://qz.fjsen.com/2021-12/01/content_30903419.htm	http://qz.fjsen.com/2021-12/01/content_30903419.htm
Party members, cadres, and the masses in Xiamen earnestly study and implement the spirit of the 11th Provincial Party Congress	http://xm.fjsen.com/2021-12/01/content_30903279.htm	http://xm.fjsen.com/2021-12/01/content_30903279.htm
Fuzhou City has issued a special plan for scientific and technological innovation during the 14th Five Year Plan period	http://fz.fjsen.com/2021-11/30/content_30902380.htm	http://fz.fjsen.com/2021-11/30/content_30902380.htm
Fujian Provincial Cadres and Masses Discuss Report of the 11th Provincial Party Congress	http://fjnews.fjsen.com/2021-11/28/content_30900633.htm	http://fjnews.fjsen.com/2021-11/28/content_30900633.htm
Interpretation of the Report of the 11th Provincial Party Congress (Part 1)	http://fjnews.fjsen.com/2021-11/28/content_30900653.htm	http://fjnews.fjsen.com/2021-11/28/content_30900653.htm
Kehua Data: With innovation as the wing, serving the global market	http://fjnews.fjsen.com/2021-11/28/content_30900646.htm	http://fjnews.fjsen.com/2021-11/28/content_30900646.htm
These high-frequency words and new hot words will take you to understand the report of the 11th Party Congress of Fujian Province	http://ar.fjsen.com/2021-11/26/content_30900202.htm	http://ar.fjsen.com/2021-11/26/content_30900202.htm
Number one, number two, number says Fujian five years	http://fjnews.fjsen.com/2021-11/26/content_30899347.htm	http://fjnews.fjsen.com/2021-11/26/content_30899347.htm
[truncated: 1,390 more rows]
